# Supplementary material
Source: MDPI journal article supplement (https://www.mdpi.com/2071-1050/12/15/5958)
Supplement: s1 [file s1]

| Potential Assets |                    |  | Indicators of Measurements (Many of these need to be studies as changes between before and after the move) | Existing Risks/Opportunities (Status Quo)              | Risks Reduced/Risks Avoided (Benefits) | Continuing Risks (Opportunity Costs for the project/Residual Costs for the people) | Risks Created (short and long-term) (macro and micro narratives of development) |    | Notes                                                                                                  |
|------------------|--------------------|--|------------------------------------------------------------------------------------------------------------|--------------------------------------------------------|----------------------------------------|------------------------------------------------------------------------------------|---------------------------------------------------------------------------------|----|--------------------------------------------------------------------------------------------------------|
| Sevanagar        |                    |  |                                                                                                            | SEV                                                    | SEV (0/1)                              | SEV (0/-1)                                                                         | SEV (0/-1)                                                                      |    | SEV                                                                                                    |
| Socio-cultural   |                    |  |                                                                                                            |                                                        | 5                                      | -4                                                                                 | -10                                                                             | -9 |                                                                                                        |
| 1                | Health             |  | Out of pocket health expenditure                                                                           | No problems mentioned                                  | 0                                      | 0                                                                                  | -1                                                                              | -1 | Hospital expenses are high                                                                             |
|                  |                    |  | Incidence of illness, types of diseases                                                                    | Low risk                                               | 0                                      | 0                                                                                  | -1                                                                              | -1 | Increase in water and vector borne diseases                                                            |
|                  |                    |  | Distance from the closest health centre                                                                    | High risk                                              | 0                                      | 0                                                                                  | -1                                                                              | -1 | Distance to the health care has increased.                                                             |
| 2                | Education          |  | Skill training                                                                                             | High risk                                              | 0                                      | -1                                                                                 | 0                                                                               | -1 | They never had any form of skill training earlier and even now                                         |
|                  |                    |  | Quality of education                                                                                       | No information                                         | 0                                      | 0                                                                                  | -1                                                                              | -1 | No schools nearby                                                                                      |
|                  |                    |  | Dropouts rates                                                                                             | High risk (Earlier the school fees were high)          | 0                                      | -1                                                                                 | 0                                                                               | -1 | Post relocation, dropout rates of both men and women are high due to lack of schools in the vicinity   |
|                  |                    |  | Level of Female Education                                                                                  | High risk                                              | 0                                      | -1                                                                                 | 0                                                                               | -1 |                                                                                                        |
| 3                | Social Safety nets |  | FORMAL : Knowledge of Entitlements and channels                                                            | No problems mentioned                                  | 0                                      | 0                                                                                  | 0                                                                               | 0  |                                                                                                        |
|                  |                    |  | INFORMAL : Structure and channels                                                                          | In the old settlement, the social dependency was high. | 0                                      | 0                                                                                  | -1                                                                              | -1 | Post relocation, people have lost their social networks especially in terms of credits and livelihoods |
| 4                | Networks           |  | Neighbourhood relations                                                                                    |                                                        | 0                                      | 0                                                                                  | -1                                                                              | -1 | Few people from the old settlement were left behind                                                    |

| Potential Assets |                     |                                                     | Indicators of Measurements (Many of these need to be studies as changes between before and after the move) | Existing Risks/Opportunities (Status Quo) | Risks Reduced/Risks Avoided (Benefits) | Continuing Risks (Opportunity Costs for the project/Residual Costs for the people) | Risks Created (short and long-term) (macro and micro narratives of development) |    | Notes                                                                                   |
|------------------|---------------------|-----------------------------------------------------|------------------------------------------------------------------------------------------------------------|-------------------------------------------|----------------------------------------|------------------------------------------------------------------------------------|---------------------------------------------------------------------------------|----|-----------------------------------------------------------------------------------------|
|                  |                     |                                                     | Collective Activities (Social benefits/Economic benefits/Religious benefits)                               |                                           | 1                                      | 0                                                                                  | 0                                                                               | 1  |                                                                                         |
| 5                | Family Extensions   | Family structure                                    | One or multiple households/Joint family                                                                    | Nuclear families                          | 0                                      | 0                                                                                  | 0                                                                               | 0  |                                                                                         |
|                  |                     | Women                                               | Household structure/Head of family                                                                         | Mixed                                     | 1                                      | 0                                                                                  | 0                                                                               | 1  | Houses in the name of the women                                                         |
|                  |                     | Older People                                        | Family support structure                                                                                   | No information                            | 0                                      | 0                                                                                  | 0                                                                               | 0  |                                                                                         |
|                  |                     |                                                     | Levels of compensations in project                                                                         | None                                      | 0                                      | 0                                                                                  | -1                                                                              | -1 |                                                                                         |
|                  |                     | Children                                            | Support by Anganwadis                                                                                      | None                                      | 0                                      | 0                                                                                  | -1                                                                              | -1 |                                                                                         |
|                  |                     | Physically disabled                                 | Access to entitlements                                                                                     | No                                        | 0                                      | -1                                                                                 | 0                                                                               | -1 |                                                                                         |
| 6                | Community Structure |                                                     | Collective assets                                                                                          |                                           | 1                                      | 0                                                                                  | 0                                                                               | 1  | They have temple, church                                                                |
| 7                | Psychological risks | Privacy, Dignity, Safety against crime and conflict | Memory, Manifestation of shock, Insecurity (Stress) [Stratified sampling]                                  | Low risk                                  | 0                                      | 0                                                                                  | -1                                                                              | -1 | Alcoholism, women feel unsafe, many people have still not come out the relocation shock |
|                  |                     |                                                     | Safety                                                                                                     | Low-risk                                  | 0                                      | 0                                                                                  | -1                                                                              | -1 | Theft, unsafe for women                                                                 |
|                  |                     |                                                     | Toilets for women - use, location and number                                                               | High risk                                 | 1                                      | 0                                                                                  | 0                                                                               | 1  | Individual toilets at home                                                              |

| Potential Assets                       |                    |                                 | Indicators of Measurements (Many of these need to be studies as changes between before and after the move) | Existing Risks/Opportunities (Status Quo) | Risks Reduced/Risks Avoided (Benefits) | Continuing Risks (Opportunity Costs for the project/Residual Costs for the people) | Risks Created (short and long-term) (macro and micro narratives of development) |           | Notes                                                                                                                                                       |
|----------------------------------------|--------------------|---------------------------------|------------------------------------------------------------------------------------------------------------|-------------------------------------------|----------------------------------------|------------------------------------------------------------------------------------|---------------------------------------------------------------------------------|-----------|-------------------------------------------------------------------------------------------------------------------------------------------------------------|
| 8                                      | Cultural practices |                                 | Rituals and festivals                                                                                      |                                           | 1                                      | 0                                                                                  | 0                                                                               | 1         |                                                                                                                                                             |
| <b>Physical stock, (flow = access)</b> |                    |                                 |                                                                                                            |                                           | <b>14</b>                              | <b>-9</b>                                                                          | <b>-7</b>                                                                       | <b>-2</b> |                                                                                                                                                             |
| 1                                      | Buildings          | Before and after relocation     | Type of roof/ type of walls/ plinth                                                                        | High risk (kuchha house)                  | 1                                      | 0                                                                                  | 0                                                                               | 1         |                                                                                                                                                             |
|                                        |                    |                                 | Housing typology/form                                                                                      | Row housing                               | 0                                      | 0                                                                                  | -1                                                                              | -1        | Tenement structure (G+3)                                                                                                                                    |
|                                        |                    | Household level - built-up area | Modifications on provided/ modifications allowed                                                           |                                           | 1                                      | 0                                                                                  | 0                                                                               | 1         | People modified their houses (added shelves in the kitchen, made wash areas)                                                                                |
|                                        |                    | Household level                 | Size of the plot and covered area                                                                          |                                           | 0                                      | 0                                                                                  | -1                                                                              | -1        | people have mentioned that they had more space in the old house                                                                                             |
| 2                                      | Public systems     | Water                           | Quality/frequency/service provider                                                                         | No problems have been mentioned           | 0                                      | 0                                                                                  | -1                                                                              | -1        | Many people have complained about the quality of water, and also water infrastructure being broken. Many people have also died due to poor quality of water |
|                                        |                    |                                 | Type of supply                                                                                             | Hand pump                                 | 1                                      | 0                                                                                  | 0                                                                               | 1         | Piped water supply/water tank                                                                                                                               |
|                                        |                    | Sanitation                      | Type of disposal (before and after)                                                                        | Open defecation                           | 1                                      | 0                                                                                  | 0                                                                               | 1         | Have toilets at home                                                                                                                                        |
|                                        |                    |                                 | Type of toilet/ location                                                                                   | Open defecation                           | 1                                      | 0                                                                                  | 0                                                                               | 1         |                                                                                                                                                             |
|                                        |                    |                                 | Planning priorities and design                                                                             | Open defecation                           | 1                                      | 0                                                                                  | 0                                                                               | 1         | No problems mentioned                                                                                                                                       |

| Potential Assets |       |                         | Indicators of Measurements (Many of these need to be studies as changes between before and after the move) | Existing Risks/Opportunities (Status Quo)   | Risks Reduced/Risks Avoided (Benefits) | Continuing Risks (Opportunity Costs for the project/Residual Costs for the people) | Risks Created (short and long-term) (macro and micro narratives of development) |    | Notes                                                                                                        |
|------------------|-------|-------------------------|------------------------------------------------------------------------------------------------------------|---------------------------------------------|----------------------------------------|------------------------------------------------------------------------------------|---------------------------------------------------------------------------------|----|--------------------------------------------------------------------------------------------------------------|
|                  |       | Solid waste             | Collection system/disposal system                                                                          | No system exists                            | 0                                      | -1                                                                                 | 0                                                                               | -1 | Waste are being dumped within the colony behind the blocks                                                   |
|                  |       |                         | Reuse (approaches at local level)                                                                          | No system exists                            | 0                                      | -1                                                                                 | 0                                                                               | -1 |                                                                                                              |
|                  |       | Electricity             | Source/type of usage                                                                                       | No problems mentioned                       | 1                                      | 0                                                                                  | 0                                                                               | 1  |                                                                                                              |
|                  |       |                         | Reliability / resilience (opportunity/risk)                                                                | No problems mentioned                       | 1                                      | 0                                                                                  | 0                                                                               | 1  |                                                                                                              |
|                  |       | Energy                  | Consumption pattern (positive or negative)                                                                 | Thermal                                     | 0                                      | -1                                                                                 | 0                                                                               | -1 | Use of fire wood continues                                                                                   |
|                  |       | Transport               | Type of roads                                                                                              | Mud                                         | 1                                      | 0                                                                                  | 0                                                                               | 1  | Cement road                                                                                                  |
|                  |       |                         | Availability of public transportation                                                                      | No problems mentioned                       | 0                                      | 0                                                                                  | -1                                                                              | -1 | There is problem with frequency and access                                                                   |
|                  |       | Communication/ICT       | Early warning systems                                                                                      | No system exists                            | 0                                      | -1                                                                                 | 0                                                                               | -1 | No system exists                                                                                             |
|                  |       | Social infrastructure   | Health/education/information centre/temple                                                                 | Old site had access to these infrastructure | 0                                      | 0                                                                                  | -1                                                                              | -1 | However in the new site, they do not have access to any of the infrastructure other than a temple and church |
|                  |       | Critical infrastructure | Resilience                                                                                                 | No cyclone shelters                         | 0                                      | -1                                                                                 | 0                                                                               | -1 | None even now                                                                                                |
| 3                | O & M |                         | Community/individual/government/private                                                                    | Community/NGO                               | 1                                      | 0                                                                                  | 0                                                                               | 1  |                                                                                                              |
|                  |       | Reliability             | Resources available (ex: staff)                                                                            | Community/NGO                               | 1                                      | 0                                                                                  | 0                                                                               | 1  |                                                                                                              |

| Potential Assets |                                      |      | Indicators of Measurements (Many of these need to be studied as changes between before and after the move) | Existing Risks/Opportunities (Status Quo)                | Risks Reduced/Risks Avoided (Benefits) | Continuing Risks (Opportunity Costs for the project/Residual Costs for the people) | Risks Created (short and long-term) (macro and micro narratives of development) |     | Notes                                   |
|------------------|--------------------------------------|------|------------------------------------------------------------------------------------------------------------|----------------------------------------------------------|----------------------------------------|------------------------------------------------------------------------------------|---------------------------------------------------------------------------------|-----|-----------------------------------------|
| 4                | Land                                 |      | Productivity/tenure/inundation/expenditure                                                                 | Non alienable                                            | 1                                      | 0                                                                                  | 0                                                                               | 1   |                                         |
|                  |                                      |      | Site location/quality of soil/hazard exposure/distance from previous site                                  | High risk (exposed to floods)                            | 0                                      | -1                                                                                 | 0                                                                               | -1  |                                         |
| 5                | Public spaces                        |      | Types of public spaces                                                                                     | No information                                           | 0                                      | -1                                                                                 | 0                                                                               | -1  | Church and temple                       |
|                  |                                      |      | Available/ usage                                                                                           |                                                          | 0                                      | 0                                                                                  | 0                                                                               | 0   |                                         |
|                  |                                      |      | Play area availability and access                                                                          |                                                          | 0                                      | -1                                                                                 | 0                                                                               | -1  |                                         |
|                  |                                      |      | Proximity                                                                                                  |                                                          | 0                                      | -1                                                                                 | 0                                                                               | -1  |                                         |
| 6                | Trees and natural capital            |      | Kind of ownership/type                                                                                     |                                                          | 1                                      | 0                                                                                  | 0                                                                               | 1   |                                         |
|                  |                                      |      | Utility - (ecological balance/livelihood/quality of life)                                                  |                                                          | 0                                      | 0                                                                                  | -1                                                                              | -1  |                                         |
| 7                | No of assets                         |      | Productive/life line assets                                                                                | Few people have their own autos                          | 1                                      | 0                                                                                  | 0                                                                               | 1   |                                         |
|                  |                                      |      | Kind of ownership/usage                                                                                    |                                                          | 0                                      | 0                                                                                  | -1                                                                              | -1  | Not using like before due to relocation |
| Economic         |                                      |      |                                                                                                            |                                                          | 4                                      | -11                                                                                | -3                                                                              | -10 |                                         |
| 1                | Livelihoods - nature and composition | Type | Formal/informal                                                                                            | Informal and lack of sufficient social safety net access | 0                                      | -1                                                                                 | 0                                                                               | -1  |                                         |
|                  |                                      |      | Self-employed/daily wage labour                                                                            | Daily wage/self employed                                 | 0                                      | -1                                                                                 | 0                                                                               | -1  |                                         |
|                  |                                      |      | Diversity of income                                                                                        | Diverse income                                           | 0                                      | -1                                                                                 | 0                                                                               | -1  |                                         |

| Potential Assets |                                      |        | Indicators of Measurements (Many of these need to be studies as changes between before and after the move) | Existing Risks/Opportunities (Status Quo)  | Risks Reduced/Risks Avoided (Benefits) | Continuing Risks (Opportunity Costs for the project/Residual Costs for the people) | Risks Created (short and long-term) (macro and micro narratives of development) |    | Notes                                                                                          |
|------------------|--------------------------------------|--------|------------------------------------------------------------------------------------------------------------|--------------------------------------------|----------------------------------------|------------------------------------------------------------------------------------|---------------------------------------------------------------------------------|----|------------------------------------------------------------------------------------------------|
|                  | Household level                      |        | Sole/multiple earners                                                                                      | Sole                                       | 0                                      | 0                                                                                  | -1                                                                              | -1 | Post relocation, many women have started working as their husbands spends the money on alcohol |
|                  |                                      |        | Gender perspective                                                                                         | Equal                                      | 1                                      | 0                                                                                  | 0                                                                               | 1  | Titles in the name of women                                                                    |
|                  |                                      | Labour | Skill and education status                                                                                 | Traditional risk                           | 0                                      | -1                                                                                 | 0                                                                               | -1 |                                                                                                |
|                  | Pattern of consumption               |        | Type and quantum of savings                                                                                | No bank accounts earlier                   | 1                                      | 0                                                                                  | 0                                                                               | 1  | New bank accounts have been created                                                            |
|                  |                                      |        |                                                                                                            |                                            |                                        |                                                                                    |                                                                                 |    |                                                                                                |
| 2                | Marketable and non-marketable assets |        | Usage and type (Ex: refrigerator, car )                                                                    | Not many people have non-marketable assets | 0                                      | -1                                                                                 | 0                                                                               | -1 | There's been no change in terms of access to marketable assets.                                |
|                  |                                      |        | Economic asset ownership patterns                                                                          |                                            | 0                                      | -1                                                                                 | 0                                                                               | -1 |                                                                                                |
|                  |                                      |        | House ownership                                                                                            | None                                       | 1                                      | 0                                                                                  | 0                                                                               | 1  | and ownership is non-alienable and not freely marketable                                       |
| 3                | Access to financial services         |        | Type (formal, informal)                                                                                    | Earlier they had no bank accounts          | 1                                      | 0                                                                                  | 0                                                                               | 1  | Now they have bank accounts                                                                    |
|                  |                                      |        | How they access                                                                                            | Social networks                            | 0                                      | 0                                                                                  | -1                                                                              | -1 | Relocation has broken their networks                                                           |
| 4                | Financial/capital investments        |        | Mutual funds/bonds/savings - all channels but liquids                                                      |                                            | 0                                      | 0                                                                                  | -1                                                                              | -1 | Not saving now                                                                                 |
|                  |                                      |        | House/land/other assets                                                                                    |                                            | 0                                      | -1                                                                                 | 0                                                                               | -1 |                                                                                                |

| Potential Assets |                               |                      | Indicators of Measurements (Many of these need to be studies as changes between before and after the move)             | Existing Risks/Opportunities (Status Quo) | Risks Reduced/Risks Avoided (Benefits) | Continuing Risks (Opportunity Costs for the project/Residual Costs for the people) | Risks Created (short and long-term) (macro and micro narratives of development) |    | Notes                                                                          |
|------------------|-------------------------------|----------------------|------------------------------------------------------------------------------------------------------------------------|-------------------------------------------|----------------------------------------|------------------------------------------------------------------------------------|---------------------------------------------------------------------------------|----|--------------------------------------------------------------------------------|
| 5                | Risk transfer and sharing     |                      | Formal and informal (SHG, local chit funds, other channels)                                                            |                                           | 0                                      | -1                                                                                 | 0                                                                               | -1 |                                                                                |
|                  |                               |                      | Insurance - micro/business                                                                                             |                                           | 0                                      | -1                                                                                 | 0                                                                               | -1 |                                                                                |
|                  |                               |                      | Insurance - life (health, accident)/ non-life (endowment, child, building, crop, vehicle, fire, catastrophic, weather) |                                           | 0                                      | -1                                                                                 | 0                                                                               | -1 |                                                                                |
|                  |                               |                      | Cooperative/ individual arrangements                                                                                   |                                           | 0                                      | -1                                                                                 | 0                                                                               | -1 |                                                                                |
| Environmental    |                               |                      |                                                                                                                        |                                           | 1                                      | -2                                                                                 | -4                                                                              | -5 |                                                                                |
| 1                | Quality and quantity of water |                      | Scenario - before and after                                                                                            | No problems were mentioned                | 0                                      | 0                                                                                  | -1                                                                              | -1 | People have complained about the poor quality of water                         |
|                  |                               | State of environment | Primary and secondary impacts on individuals                                                                           | No problems were mentioned                | 0                                      | 0                                                                                  | -1                                                                              | -1 | People dump garbage near their houses which eventually affects the environment |
|                  |                               | source               | Surface water/ground water                                                                                             | Ground water                              | 1                                      | 0                                                                                  | 0                                                                               | 1  | Ground water. Bore well                                                        |
| 2                | Quality of air                |                      | Secondary level impacts on individuals ( ex: health, respiratory problems)                                             |                                           | 0                                      | 0                                                                                  | -1                                                                              | -1 | The site stinks due to improper garbage disposal and broken sewerage           |
| 3                | Green cover                   |                      | Type of vegetation                                                                                                     |                                           | 0                                      | -1                                                                                 | 0                                                                               | -1 |                                                                                |
|                  |                               |                      | Proportion of green cover                                                                                              | Less cover                                | 0                                      | -1                                                                                 | 0                                                                               | -1 |                                                                                |

| Potential Assets                                       |              |                         | Indicators of Measurements (Many of these need to be studies as changes between before and after the move) | Existing Risks/Opportunities (Status Quo) | Risks Reduced/Risks Avoided (Benefits) | Continuing Risks (Opportunity Costs for the project/Residual Costs for the people) | Risks Created (short and long-term) (macro and micro narratives of development) |           | Notes                                                                                           |
|--------------------------------------------------------|--------------|-------------------------|------------------------------------------------------------------------------------------------------------|-------------------------------------------|----------------------------------------|------------------------------------------------------------------------------------|---------------------------------------------------------------------------------|-----------|-------------------------------------------------------------------------------------------------|
| 4                                                      | Biodiversity |                         | Secondary level impacts on individuals (narrative)                                                         | None                                      | 0                                      | 0                                                                                  | -1                                                                              | -1        | Dogs and pigs                                                                                   |
| <b>Institutional/Governance and regulatory (I/G/R)</b> |              |                         |                                                                                                            |                                           | <b>1</b>                               |                                                                                    | <b>0</b>                                                                        | <b>0</b>  |                                                                                                 |
| 1                                                      |              |                         | Types of existing institutions (Formal/informal)                                                           | Community level committees                | 1                                      | 0                                                                                  | 0                                                                               | 1         |                                                                                                 |
| 2                                                      |              | Risk created by (I/G/R) | National/state/district level                                                                              |                                           | 0                                      | 0                                                                                  | 0                                                                               | 0         |                                                                                                 |
|                                                        |              |                         | Differential impacts on other groups (community based, old aged/marginalised populations)                  | High (community based)                    | 0                                      | -1                                                                                 | 0                                                                               | -1        | Lack of sufficient entitlements for the marginalised (old and disabled in particular) continues |
| 3                                                      |              | Risk to (I/G/R)         | Decision leading to risks                                                                                  |                                           | 0                                      | 0                                                                                  | 0                                                                               | 0         |                                                                                                 |
| <b>Quality of Life and Political agency</b>            |              |                         |                                                                                                            |                                           | <b>0</b>                               | <b>0</b>                                                                           | <b>-6</b>                                                                       | <b>-6</b> |                                                                                                 |
|                                                        |              |                         | Access to public transportation                                                                            |                                           | 0                                      | 0                                                                                  | -1                                                                              | -1        | High risk                                                                                       |
|                                                        |              |                         | Access to primary, secondary and tertiary education                                                        |                                           | 0                                      | 0                                                                                  | -1                                                                              | -1        | High risk (no schools/anganwadis in the vicinity)                                               |
|                                                        |              |                         | Access to public spaces                                                                                    |                                           | 0                                      | 0                                                                                  | -1                                                                              | -1        | High risk (only a temple and church exists)                                                     |
|                                                        |              |                         | Access to public distribution system/any other sources                                                     |                                           | 0                                      | 0                                                                                  | -1                                                                              | -1        | High risk                                                                                       |
|                                                        |              |                         | Access to adequate health facilities                                                                       |                                           | 0                                      | 0                                                                                  | -1                                                                              | -1        | High risk (no hospitals in the vicinity)                                                        |



| Potential Assets |  |  | Indicators of Measurements (Many of these need to be studies as changes between before and after the move) | Existing Risks/Opportunities (Status Quo) | Risks Reduced/Risks Avoided (Benefits) | Continuing Risks (Opportunity Costs for the project/Residual Costs for the people) | Risks Created (short and long-term) (macro and micro narratives of development) |     | Notes     |
|------------------|--|--|------------------------------------------------------------------------------------------------------------|-------------------------------------------|----------------------------------------|------------------------------------------------------------------------------------|---------------------------------------------------------------------------------|-----|-----------|
|                  |  |  | Access to entitlements                                                                                     |                                           | 0                                      | 0                                                                                  | -1                                                                              | -1  | High risk |
|                  |  |  |                                                                                                            |                                           | 25                                     | -27                                                                                | -30                                                                             | -32 |           |

| Potential Assets     |           |  | Indicators of Measurements (Many of these need to be studies as changes between before and after the move) | Existing Risks/Opportunities (Status Quo) | Risks Reduced/Risks Avoided (Benefits) | Continuing Risks (Opportunity Costs for the project/Residual Costs for the people) | Risks Created (short and long-term) (macro and micro narratives of development) |     | Notes                                                                                                                                                                                      |
|----------------------|-----------|--|------------------------------------------------------------------------------------------------------------|-------------------------------------------|----------------------------------------|------------------------------------------------------------------------------------|---------------------------------------------------------------------------------|-----|--------------------------------------------------------------------------------------------------------------------------------------------------------------------------------------------|
| Paradesipalem ( PAP) |           |  |                                                                                                            | PAP                                       | PAP (0/1)                              | PAP (0/-1)                                                                         | PAP (0/-1)                                                                      |     | PAP                                                                                                                                                                                        |
| Socio-cultural       |           |  |                                                                                                            |                                           | 3                                      | -5                                                                                 | -8                                                                              | -10 |                                                                                                                                                                                            |
| 1                    | Health    |  | Out of pocket health expenditure                                                                           | High risk                                 | 0                                      | 0                                                                                  | -1                                                                              | -1  | No government hospital close by. They need to travel 5 km even to access a private hospital. Many people mentioned that they need to spend on travel and hospital expenses are little high |
|                      |           |  | Incidence of illness, types of diseases                                                                    | Medium risk                               | 0                                      | -1                                                                                 | 0                                                                               | -1  | 11 out of 23 samples complained about regular cold and fever. Rest of them mentioned about infections, vector & water borne diseases                                                       |
|                      |           |  | Move to working in hazardous conditions                                                                    | None                                      | 0                                      | 0                                                                                  | 0                                                                               | 0   |                                                                                                                                                                                            |
|                      |           |  | Distance from the closest health centre                                                                    | Low risk                                  | 0                                      | 0                                                                                  | -1                                                                              | -1  | Many people complained about access, even during emergency they would either walk or take private transport ( 1-5 km)                                                                      |
| 2                    | Education |  | Skill training                                                                                             | Mason training                            | 0                                      | -1                                                                                 | 0                                                                               | -1  | State could have provided skill training as part of in-situ project development                                                                                                            |
|                      |           |  | Quality of education                                                                                       | No problems mentioned                     | 0                                      | 0                                                                                  | 0                                                                               | 0   |                                                                                                                                                                                            |

| Potential Assets |                    |  | Indicators of Measurements (Many of these need to be studies as changes between before and after the move) | Existing Risks/Opportunities (Status Quo)                        | Risks Reduced/Risks Avoided (Benefits) | Continuing Risks (Opportunity Costs for the project/Residual Costs for the people) | Risks Created (short and long-term) (macro and micro narratives of development) |    | Notes                                                                                                                                                                                                                                                                                  |
|------------------|--------------------|--|------------------------------------------------------------------------------------------------------------|------------------------------------------------------------------|----------------------------------------|------------------------------------------------------------------------------------|---------------------------------------------------------------------------------|----|----------------------------------------------------------------------------------------------------------------------------------------------------------------------------------------------------------------------------------------------------------------------------------------|
|                  |                    |  | Learning ecosystems                                                                                        |                                                                  | 0                                      | 0                                                                                  | 0                                                                               | 0  |                                                                                                                                                                                                                                                                                        |
|                  |                    |  | Dropouts rates                                                                                             | Medium risk                                                      | 0                                      | 0                                                                                  | -1                                                                              | -1 | people mentioned about dropouts after moving to new site. Due to increased travel time and no proper transportation facility. It would get late by the time children reach their home (from the city which is more than 25 km). No street lights along the approach road - feel unsafe |
|                  |                    |  | Level of Female Education                                                                                  | High drop outs                                                   | 0                                      | -1                                                                                 | 0                                                                               | -1 |                                                                                                                                                                                                                                                                                        |
| 3                | Social Safety nets |  | FORMAL : Knowledge of Entitlements and channels                                                            | Low risk (Within communities)                                    | 0.5                                    | -0.5                                                                               | 0                                                                               | 0  | Women and men are very active through groups and they know how to access                                                                                                                                                                                                               |
|                  |                    |  | INFORMAL : Structure and channels                                                                          | low risk                                                         | 0                                      | 0                                                                                  | -1                                                                              | -1 | Lost their networks                                                                                                                                                                                                                                                                    |
| 4                | Networks           |  | Neighbourhood relations                                                                                    | None of them mentioned about their bonding with their neighbours | 1                                      | 0                                                                                  | 0                                                                               | 1  | livelihood and women groups. It is Close knit community                                                                                                                                                                                                                                |

| Potential Assets |                   |                     | Indicators of Measurements (Many of these need to be studies as changes between before and after the move) | Existing Risks/Opportunities (Status Quo) | Risks Reduced/Risks Avoided (Benefits) | Continuing Risks (Opportunity Costs for the project/Residual Costs for the people) | Risks Created (short and long-term) (macro and micro narratives of development) |    | Notes                                                                                                                                                                                  |
|------------------|-------------------|---------------------|------------------------------------------------------------------------------------------------------------|-------------------------------------------|----------------------------------------|------------------------------------------------------------------------------------|---------------------------------------------------------------------------------|----|----------------------------------------------------------------------------------------------------------------------------------------------------------------------------------------|
| 5                |                   |                     | Collective Activities (Social benefits/Economic benefits/Religious benefits)                               | Low risk (Within communities)             | 0.5                                    | -0.5                                                                               | 0                                                                               | 0  | They solve their community level problems collectively. Women are quite active ex: they do collective representations (most of them mention about similar problems at community level) |
|                  |                   |                     | Stories of reliance/Dependence                                                                             |                                           | 0                                      | 0                                                                                  | 0                                                                               | 0  |                                                                                                                                                                                        |
|                  | Family Extensions | Family structure    | One or multiple households/Joint family                                                                    | Joint families                            | 0                                      | 0                                                                                  | -1                                                                              | -1 | Old aged people or parents started living separately - size of the new house                                                                                                           |
|                  |                   | Women               | Household structure/Head of family                                                                         | No much information                       | 0                                      | 0                                                                                  | 0                                                                               | 0  | Women mostly active in managing household expenditure                                                                                                                                  |
|                  |                   | Older People        | Family support structure                                                                                   | Started moving out                        | 0                                      | 0                                                                                  | -1                                                                              | -1 | together before not after                                                                                                                                                              |
|                  |                   |                     | Levels of compensations in project                                                                         |                                           | 0                                      | 0                                                                                  | 0                                                                               | 0  |                                                                                                                                                                                        |
|                  |                   | Children            | Support by Anganwadis                                                                                      | No much information                       | 0                                      | 0                                                                                  | 0                                                                               | 0  |                                                                                                                                                                                        |
|                  |                   | Physically disabled | Access to entitlements                                                                                     | No much information                       | 0                                      | 0                                                                                  | 0                                                                               | 0  | No samples                                                                                                                                                                             |
|                  |                   |                     | Levels of compensations in project                                                                         |                                           | 0                                      | 0                                                                                  | 0                                                                               | 0  |                                                                                                                                                                                        |

| Potential Assets |                     |                                                     | Indicators of Measurements (Many of these need to be studies as changes between before and after the move) | Existing Risks/Opportunities (Status Quo) | Risks Reduced/Risks Avoided (Benefits) | Continuing Risks (Opportunity Costs for the project/Residual Costs for the people) | Risks Created (short and long-term) (macro and micro narratives of development) |    | Notes                                                                                                                                      |
|------------------|---------------------|-----------------------------------------------------|------------------------------------------------------------------------------------------------------------|-------------------------------------------|----------------------------------------|------------------------------------------------------------------------------------|---------------------------------------------------------------------------------|----|--------------------------------------------------------------------------------------------------------------------------------------------|
| 6                | Community Structure |                                                     | Collective assets                                                                                          | No problems mentioned                     | 0                                      | -1                                                                                 | 0                                                                               | -1 | sewerage treatment plant. They don't have access to community hall, play area, temple etc., - as they used to have access within proximity |
| 7                | Psychological risks | Privacy, Dignity, Safety against crime and conflict | Memory, Manifestation of shock, Insecurity (Stress) [Stratified sampling]                                  | No problems mentioned                     | 0                                      | 0                                                                                  | 0                                                                               | 0  | most of them used to live in pucca house for rent                                                                                          |
|                  |                     |                                                     | Safety                                                                                                     | High risk                                 | 0                                      | 0                                                                                  | -1                                                                              | -1 | no street lights                                                                                                                           |
|                  |                     |                                                     | Space creation                                                                                             | Medium risk                               | 0                                      | 0                                                                                  | -1                                                                              | -1 | Space                                                                                                                                      |
|                  |                     |                                                     | Number of incidences and their dimensions                                                                  | No problems mentioned                     | 0                                      | 0                                                                                  | 0                                                                               | 0  |                                                                                                                                            |
|                  |                     |                                                     | Toilets for women - use, location and number                                                               | Low risk                                  | 1                                      | 0                                                                                  | 0                                                                               | 1  | have access to toilets at home                                                                                                             |
|                  |                     |                                                     | Transit housing quality and standards, Project considerations for cultural sensitivities                   | No problems mentioned                     | 0                                      | 0                                                                                  | 0                                                                               | 0  |                                                                                                                                            |
| 8                | Cultural practices  |                                                     | Rituals and festivals                                                                                      | No problems mentioned                     | 0                                      | 0                                                                                  | 0                                                                               | 0  |                                                                                                                                            |

| Potential Assets                |                |                                 | Indicators of Measurements (Many of these need to be studies as changes between before and after the move) | Existing Risks/Opportunities (Status Quo)                                                  | Risks Reduced/Risks Avoided (Benefits) | Continuing Risks (Opportunity Costs for the project/Residual Costs for the people) | Risks Created (short and long-term) (macro and micro narratives of development) |    | Notes                                                                                                                                                      |
|---------------------------------|----------------|---------------------------------|------------------------------------------------------------------------------------------------------------|--------------------------------------------------------------------------------------------|----------------------------------------|------------------------------------------------------------------------------------|---------------------------------------------------------------------------------|----|------------------------------------------------------------------------------------------------------------------------------------------------------------|
| Physical stock, (flow = access) |                |                                 |                                                                                                            |                                                                                            | 12.5                                   | -11                                                                                | -8.5                                                                            | -7 |                                                                                                                                                            |
| 1                               | Buildings      | Before and after relocation     | Type of roof/ type of walls/ plinth                                                                        | low risk- only a few people mentioned about - Exposed to risks and damages during cyclones | 1                                      | 0                                                                                  | 0                                                                               | 1  | risk avoided - frequent roof and wall damages                                                                                                              |
|                                 |                |                                 | Housing typology/form                                                                                      | row housing                                                                                | 0                                      | 0                                                                                  | -1                                                                              | -1 | old people can't climb stairs                                                                                                                              |
|                                 |                | Household level - built-up area | Modifications on provided/ modifications allowed                                                           | No much information                                                                        | 1                                      | 0                                                                                  | 0                                                                               | 1  | . Yes, few people made                                                                                                                                     |
|                                 |                | Household level                 | Size of the plot and covered area                                                                          | No much information                                                                        | 0.5                                    | -0.5                                                                               | 0                                                                               | 0  | Not sufficient for large HH size                                                                                                                           |
| 2                               | Public systems | Water                           | Quality/frequency/service provider                                                                         | Hand pump - high risk                                                                      | 1                                      | 0                                                                                  | 0                                                                               | 1  | many people complained about access. Despite having household level water connections, most of them use hand pump to collect drinking water (water colour) |
|                                 |                |                                 | Type of supply                                                                                             | Hand pump/ Public tap                                                                      | 1                                      | 0                                                                                  | 0                                                                               | 1  | HH connections                                                                                                                                             |
|                                 |                |                                 | Sources and usage - drinking and non-drinking                                                              | Ground water/ Hand pump                                                                    | 0                                      | -1                                                                                 | 0                                                                               | -1 | Ground water                                                                                                                                               |
|                                 |                |                                 | Type of storage                                                                                            | No problems mentioned                                                                      | 0                                      | -0.5                                                                               | 0.5                                                                             | 0  | No enough space for storage                                                                                                                                |
|                                 |                | Sanitation                      | Type of disposal (before and after)                                                                        | No problems mentioned                                                                      | 1                                      | 0                                                                                  | 0                                                                               | 1  | have access to toilets at home                                                                                                                             |
|                                 |                |                                 | Type of toilet/ location                                                                                   | No problems mentioned                                                                      | 1                                      | 0                                                                                  | 0                                                                               | 1  | at home                                                                                                                                                    |

| Potential Assets |       |                         | Indicators of Measurements (Many of these need to be studies as changes between before and after the move) | Existing Risks/Opportunities (Status Quo)                | Risks Reduced/Risks Avoided (Benefits) | Continuing Risks (Opportunity Costs for the project/Residual Costs for the people) | Risks Created (short and long-term) (macro and micro narratives of development) |    | Notes                                                         |
|------------------|-------|-------------------------|------------------------------------------------------------------------------------------------------------|----------------------------------------------------------|----------------------------------------|------------------------------------------------------------------------------------|---------------------------------------------------------------------------------|----|---------------------------------------------------------------|
|                  |       |                         | Planning priorities and design                                                                             | No problems mentioned                                    | 0                                      | 0                                                                                  | 0                                                                               | 0  | No problems mentioned                                         |
|                  |       | Solid waste             | Collection system/disposal system                                                                          | No system exists. High risk                              | 0                                      | -1                                                                                 | 0                                                                               | -1 | State government would have created a space for dumping waste |
|                  |       |                         | Reuse (approaches at local level)                                                                          | No system exists                                         | 0                                      | -1                                                                                 | 0                                                                               | -1 |                                                               |
|                  |       | Electricity             | Source/type of usage                                                                                       | No problems mentioned                                    | 1                                      | 0                                                                                  | 0                                                                               | 1  |                                                               |
|                  |       |                         | Reliability / resilience (opportunity/risk)                                                                | No problems mentioned                                    | 0                                      | 0                                                                                  | -1                                                                              | -1 | No electricity in public spaces- Street lights                |
|                  |       | Energy                  | Consumption pattern (positive or negative)                                                                 | No problems mentioned                                    | 1                                      | 0                                                                                  | 0                                                                               | 1  | have gas connections - through government scheme              |
|                  |       | Transport               | Type of roads                                                                                              | Main road is made of cement, rest is mud                 | 1                                      | 0                                                                                  | 0                                                                               | 1  |                                                               |
|                  |       |                         | Availability of public transportation                                                                      | Low risk                                                 | 0                                      | 0                                                                                  | -1                                                                              | -1 | High risk - no proper access to public transportation         |
|                  |       | Communication/ ICT      | Early warning systems                                                                                      | Announcements are done                                   | 0                                      | -1                                                                                 | 0                                                                               | -1 | No arrangements are made                                      |
|                  |       | Social infrastructure   | Health/education/information centre/ temple                                                                | Low risk - they have access to all these within vicinity | 0                                      | 0                                                                                  | -1                                                                              | -1 | No access                                                     |
|                  |       | Critical infrastructure | Resilience                                                                                                 | They don't have anything as such                         | 0                                      | -1                                                                                 | 0                                                                               | -1 | Nothing is provided yet                                       |
| 3                | O & M |                         | Community/individual/ government/ private                                                                  | No information                                           | 1                                      | 0                                                                                  | 0                                                                               | 1  | NGO is involved with community people                         |

| Potential Assets |                           |                 | Indicators of Measurements (Many of these need to be studies as changes between before and after the move) | Existing Risks/Opportunities (Status Quo) | Risks Reduced/Risks Avoided (Benefits) | Continuing Risks (Opportunity Costs for the project/Residual Costs for the people) | Risks Created (short and long-term) (macro and micro narratives of development) |    | Notes                                                                 |
|------------------|---------------------------|-----------------|------------------------------------------------------------------------------------------------------------|-------------------------------------------|----------------------------------------|------------------------------------------------------------------------------------|---------------------------------------------------------------------------------|----|-----------------------------------------------------------------------|
|                  |                           | Reliability     | Resources available (ex: staff)                                                                            | No information                            | 0                                      | -1                                                                                 | 0                                                                               | -1 | No person is appointed                                                |
|                  |                           | Community level | Issues if any/ways of resolution                                                                           | No information                            | 0                                      | -1                                                                                 | 0                                                                               | -1 | Collective efforts are being made by community people                 |
|                  |                           | Community level | Awareness about channels (ex: approaching officials)                                                       | No information                            | 1                                      | 0                                                                                  | 0                                                                               | 1  | Collective efforts are being made by community people                 |
| 4                | Land                      |                 | Productivity/tenure/inundation/expenditure                                                                 | They used to stay for rent                | 0                                      | -1                                                                                 | 0                                                                               | -1 | High productivity/non alienable                                       |
|                  |                           |                 | Site location/quality of soil/hazard exposure/distance from previous site                                  | High risk                                 | 0                                      | 0                                                                                  | -1                                                                              | -1 | Far from city                                                         |
| 5                | Public spaces             |                 | Types of public spaces                                                                                     | Low risk- at least they used have access  | 0                                      | 0                                                                                  | -1                                                                              | -1 | Need to travel more than 10 km - nothing is available within vicinity |
|                  |                           |                 | Available/ usage                                                                                           | No information                            | 0                                      | 0                                                                                  | 0                                                                               | 0  |                                                                       |
|                  |                           |                 | Play area availability and access                                                                          | No information                            | 0                                      | -1                                                                                 | 0                                                                               | -1 | Don't have any - high risk                                            |
|                  |                           |                 | Proximity                                                                                                  | low risk                                  | 0                                      | 0                                                                                  | -1                                                                              | -1 | very far – at least they need to travel for more than 5 km            |
| 6                | Trees and natural capital |                 | Kind of ownership/type                                                                                     | No information                            | 1                                      | 0                                                                                  | 0                                                                               | 1  | people use outside space for growing vegetables                       |
|                  |                           |                 | Utility - (ecological balance/livelihood/quality of life)                                                  | No information                            | 0                                      | 0                                                                                  | -1                                                                              | -1 | Un-cleared bushes - threat of attack by snakes                        |



| Potential Assets |                                      |                 | Indicators of Measurements (Many of these need to be studies as changes between before and after the move) | Existing Risks/Opportunities (Status Quo)      | Risks Reduced/Risks Avoided (Benefits) | Continuing Risks (Opportunity Costs for the project/Residual Costs for the people) | Risks Created (short and long-term) (macro and micro narratives of development) |     | Notes                                                                                                                 |
|------------------|--------------------------------------|-----------------|------------------------------------------------------------------------------------------------------------|------------------------------------------------|----------------------------------------|------------------------------------------------------------------------------------|---------------------------------------------------------------------------------|-----|-----------------------------------------------------------------------------------------------------------------------|
| 7                | No of assets                         |                 | Productive/life line assets                                                                                | Autos, watch repair tools, cooking equipment   | 0                                      | -1                                                                                 | 0                                                                               | -1  | Most of use their houses to run shops - grocery, breakfast. Most of them rely on the asset they have it from earlier  |
|                  |                                      |                 | Kind of ownership/usage                                                                                    | Individual                                     | 0                                      | 0                                                                                  | -1                                                                              | -1  | Post relocation - most of them don't use that quite often - they go to work alternate days before it is not like this |
| 8                | Food                                 |                 | Staples/kind of food                                                                                       | No problems mentioned                          |                                        |                                                                                    |                                                                                 | 0   |                                                                                                                       |
|                  |                                      |                 | Consumption pattern (quantity and expenditure)                                                             | No problems mentioned                          |                                        |                                                                                    |                                                                                 | 0   | Expenditure increased after relocation                                                                                |
|                  |                                      |                 | Availability                                                                                               | No problems mentioned                          |                                        |                                                                                    |                                                                                 | 0   |                                                                                                                       |
| Economic         |                                      |                 |                                                                                                            |                                                | 4                                      | -10.5                                                                              | -4.5                                                                            | -11 |                                                                                                                       |
| 1                | Livelihoods - nature and composition | Type            | Formal/informal                                                                                            | Informal                                       | 0                                      | -1                                                                                 | 0                                                                               | -1  | very diverse income activities                                                                                        |
|                  |                                      |                 | Self-employed/daily wage labour                                                                            | Daily wage and self - employed                 | 0                                      | -1                                                                                 | 0                                                                               | -1  | Lost their networks                                                                                                   |
|                  |                                      |                 | Diversity of income                                                                                        | Yes, very diversified                          | 0                                      | -1                                                                                 | 0                                                                               | -1  | May not support each other                                                                                            |
|                  |                                      | Household level | Sole/multiple earners                                                                                      | More than one person on an average are earners | 0                                      | 0                                                                                  | -1                                                                              | -1  | women stopped working - lost their alternate source of income                                                         |
|                  |                                      |                 | Gender perspective                                                                                         | Low risk                                       | 0                                      | 0                                                                                  | -1                                                                              | -1  | most of the women stopped working - as they relocated very far - increase in travel expenditure- lost their networks  |

| Potential Assets |                                      |        | Indicators of Measurements (Many of these need to be studies as changes between before and after the move) | Existing Risks/Opportunities (Status Quo)                  | Risks Reduced/Risks Avoided (Benefits) | Continuing Risks (Opportunity Costs for the project/Residual Costs for the people) | Risks Created (short and long-term) (macro and micro narratives of development) |    | Notes                                                                                       |
|------------------|--------------------------------------|--------|------------------------------------------------------------------------------------------------------------|------------------------------------------------------------|----------------------------------------|------------------------------------------------------------------------------------|---------------------------------------------------------------------------------|----|---------------------------------------------------------------------------------------------|
|                  |                                      | Labour | Skill and education status                                                                                 | Not enough information                                     | 0                                      | -1                                                                                 | 0                                                                               | -1 | Could have been trained                                                                     |
|                  | Pattern of consumption               |        | Type and quantum of savings                                                                                | No savings                                                 | 0                                      | -1                                                                                 | 0                                                                               | -1 | Though they have bank accounts – won't save much                                            |
| 2                | Marketable and non-marketable assets |        | Usage and type (Ex: refrigerator, car )                                                                    | No information                                             | 0.5                                    | -0.5                                                                               | 0                                                                               | 0  | No change in terms of access to marketable assets. They could invested in marketable assets |
|                  |                                      |        | Economic asset ownership patterns                                                                          | No information                                             | 0.5                                    | -0.5                                                                               | 0                                                                               | 0  | No change in terms of access to economic assets. They could invested                        |
|                  |                                      |        | House ownership                                                                                            | Individual                                                 | 0                                      | -1                                                                                 | 0                                                                               | -1 | Land ownership is non-alienable and not freely marketable                                   |
| 3                | Access to financial services         |        | Type (formal, informal)                                                                                    | Both formal and informal banking systems, but no insurance | 1                                      | 0                                                                                  | 0                                                                               | 1  | New bank accounts could help save more                                                      |
|                  |                                      |        | How they access                                                                                            | Social networks                                            | 1                                      | 0                                                                                  | 0                                                                               | 1  | Can continue                                                                                |
| 4                | Financial/capital investments        |        | Mutual funds/bonds/savings - all channels but liquids                                                      | Not saving much                                            | 0                                      | -0.5                                                                               | 0.5                                                                             | 0  | Earlier they used to save some - expenditure increased                                      |
|                  |                                      |        | House/land/other assets                                                                                    | medium risk                                                | 0                                      | -1                                                                                 | 0                                                                               | -1 | Livelihood                                                                                  |
| 5                | Risk transfer and sharing            |        | Formal and informal (SHG, local chit funds, other channels)                                                | Both                                                       | 1                                      | 0                                                                                  | -1                                                                              | 0  | women save through SHG's and chits - most of them lost their networks                       |

| Potential Assets |                               |                      | Indicators of Measurements (Many of these need to be studies as changes between before and after the move)             | Existing Risks/Opportunities (Status Quo) | Risks Reduced/Risks Avoided (Benefits) | Continuing Risks (Opportunity Costs for the project/Residual Costs for the people) | Risks Created (short and long-term) (macro and micro narratives of development) |    | Notes                                                                  |
|------------------|-------------------------------|----------------------|------------------------------------------------------------------------------------------------------------------------|-------------------------------------------|----------------------------------------|------------------------------------------------------------------------------------|---------------------------------------------------------------------------------|----|------------------------------------------------------------------------|
|                  |                               |                      | Insurance - micro/business                                                                                             | No                                        | 0                                      | 0                                                                                  | -1                                                                              | -1 | Lost their networks                                                    |
|                  |                               |                      | Insurance - life (health, accident)/ non-life (endowment, child, building, crop, vehicle, fire, catastrophic, weather) | No                                        | 0                                      | -1                                                                                 | 0                                                                               | -1 |                                                                        |
|                  |                               |                      | Insurance - asset/output based                                                                                         | No                                        | 0                                      | -1                                                                                 | 0                                                                               | -1 |                                                                        |
|                  |                               |                      | Cooperative/ individual arrangements                                                                                   | used to have access to informal networks  | 0                                      | 0                                                                                  | -1                                                                              | -1 | No access to networks                                                  |
| Environmental    |                               |                      |                                                                                                                        |                                           | 1.5                                    | -1.5                                                                               | -1                                                                              | -1 |                                                                        |
| 1                | Quality and quantity of water |                      | Scenario - before and after                                                                                            | No mention of such issues                 | 0                                      | 0                                                                                  | -1                                                                              | -1 | Quality - high risk                                                    |
|                  |                               | State of environment | Primary and secondary impacts on individuals                                                                           | No mention of such issues                 | 0                                      | 0                                                                                  | 0                                                                               | 0  |                                                                        |
|                  |                               | source               | Surface water/ground water                                                                                             | No mention of such issues                 | 0.5                                    | -0.5                                                                               | 0                                                                               | 0  | Ground water                                                           |
| 2                | Quality of air                |                      | Secondary level impacts on individuals ( ex: health, respiratory problems)                                             | No mention of such issues                 | 0.5                                    | -0.5                                                                               | 0                                                                               | 0  | People mentioned about good environment and no breathing problems      |
| 3                | Green cover                   |                      | Type of vegetation                                                                                                     | Diverse vegetation                        | 0                                      | 0                                                                                  | 0                                                                               | 0  |                                                                        |
|                  |                               |                      | Proportion of green cover                                                                                              | Good cover                                | 0.5                                    | -0.5                                                                               | 0                                                                               | 0  | They want to clear the vegetation around the site - threat from snakes |

| Potential Assets                                       |              |                         | Indicators of Measurements (Many of these need to be studies as changes between before and after the move) | Existing Risks/Opportunities (Status Quo) | Risks Reduced/Risks Avoided (Benefits) | Continuing Risks (Opportunity Costs for the project/Residual Costs for the people) | Risks Created (short and long-term) (macro and micro narratives of development) |           | Notes                                                            |
|--------------------------------------------------------|--------------|-------------------------|------------------------------------------------------------------------------------------------------------|-------------------------------------------|----------------------------------------|------------------------------------------------------------------------------------|---------------------------------------------------------------------------------|-----------|------------------------------------------------------------------|
| 4                                                      | Biodiversity |                         | Secondary level impacts on individuals (narrative)                                                         | None                                      | 0                                      | 0                                                                                  | 0                                                                               | 0         |                                                                  |
| <b>Institutional/Governance and regulatory (I/G/R)</b> |              |                         |                                                                                                            |                                           | <b>0.5</b>                             | <b>-1.5</b>                                                                        | <b>0</b>                                                                        | <b>-1</b> |                                                                  |
| 1                                                      |              |                         | Types of existing institutions (Formal/informal)                                                           | Formal and informal                       | 0.5                                    | -0.5                                                                               | 0                                                                               | 0         |                                                                  |
|                                                        |              |                         | Norms and governance systems (informal institutions/reasons for creating norms)                            |                                           | 0                                      | 0                                                                                  | 0                                                                               | 0         | Community level committee is responsible to make representations |
| 2                                                      |              | Risk created by (I/G/R) | National/state/district level                                                                              |                                           | 0                                      | 0                                                                                  | 0                                                                               | 0         |                                                                  |
|                                                        |              |                         | Differential impacts on other groups (community based, old aged/marginalised populations)                  | High community based                      | 0                                      | -1                                                                                 | 0                                                                               | -1        | Lack of sufficient entitlements for old                          |
| 3                                                      |              | Risk to (I/G/R)         | Decision leading to risks                                                                                  |                                           | 0                                      | 0                                                                                  | 0                                                                               | 0         |                                                                  |
| <b>Quality of Life and Political agency</b>            |              |                         |                                                                                                            |                                           | <b>0.5</b>                             | <b>-3.5</b>                                                                        | <b>-2</b>                                                                       | <b>-5</b> |                                                                  |
|                                                        |              |                         | Access to public transportation                                                                            |                                           | 0                                      | 0                                                                                  | -1                                                                              | -1        | High risk                                                        |
|                                                        |              |                         | Access to primary, secondary and tertiary education                                                        |                                           | 0                                      | 0                                                                                  | -1                                                                              | -1        | High Risk                                                        |
|                                                        |              |                         | Access to public spaces                                                                                    |                                           | 0                                      | -1                                                                                 | 0                                                                               | -1        | High risk                                                        |
|                                                        |              |                         | Access to public distribution system/any other sources                                                     |                                           | 0                                      | -1                                                                                 | 0                                                                               | -1        |                                                                  |

| Potential Assets |  |  | Indicators of Measurements (Many of these need to be studies as changes between before and after the move) | Existing Risks/Opportunities (Status Quo) | Risks Reduced/Risks Avoided (Benefits) | Continuing Risks (Opportunity Costs for the project/Residual Costs for the people) | Risks Created (short and long-term) (macro and micro narratives of development) |     | Notes       |
|------------------|--|--|------------------------------------------------------------------------------------------------------------|-------------------------------------------|----------------------------------------|------------------------------------------------------------------------------------|---------------------------------------------------------------------------------|-----|-------------|
|                  |  |  | Access to adequate health facilities                                                                       |                                           | 0                                      | -1                                                                                 | 0                                                                               | -1  | High risk   |
|                  |  |  | Access to entitlements                                                                                     |                                           | 0.5                                    | -0.5                                                                               | 0                                                                               | 0   | Medium risk |
|                  |  |  |                                                                                                            |                                           | 22                                     | -33                                                                                | -24                                                                             | -35 |             |

| Potential Assets |           |  | Indicators of Measurements (Many of these need to be studies as changes between before and after the move) | Existing Risks/Opportunities (Status Quo)                                             | Risks Reduced/Risks Avoided (Benefits) | Continuing Risks (Opportunity Costs for the project/Residual Costs for the people) | Risks Created (short and long-term) (macro and micro narratives of development) |    | Notes                                                                                                                 |
|------------------|-----------|--|------------------------------------------------------------------------------------------------------------|---------------------------------------------------------------------------------------|----------------------------------------|------------------------------------------------------------------------------------|---------------------------------------------------------------------------------|----|-----------------------------------------------------------------------------------------------------------------------|
| Sonia Gandhi     |           |  |                                                                                                            | SGN                                                                                   | SGN (0/1)                              | SGN (-1/0)                                                                         | SGN (-1/0)                                                                      |    | SGN                                                                                                                   |
| Socio-cultural   |           |  |                                                                                                            |                                                                                       | 11                                     | -5                                                                                 | -5                                                                              | 1  |                                                                                                                       |
| 1                | Health    |  | Out of pocket health expenditure                                                                           | No problems mentioned                                                                 | 1                                      | 0                                                                                  | 0                                                                               | 1  | Still accessing the same hospitals and no new risks created                                                           |
|                  |           |  | Incidence of illness, types of diseases                                                                    | Moderate Risk ( regular cold and fever, water and vector borne diseases)              | 0                                      | -1                                                                                 | 0                                                                               | -1 | no change of water sources                                                                                            |
|                  |           |  | Distance from the closest health centre                                                                    | High Risk ( 7/11 respondents said the hospital is more than 1 km from their location) | 0                                      | -1                                                                                 | 0                                                                               | -1 | Many people complained about access, even during emergency they would either walk or take private transport ( 1-5 km) |
| 2                | Education |  | Skill training                                                                                             | traditional skills                                                                    | 0                                      | -1                                                                                 | 0                                                                               | -1 | No training was provided for beneficiaries during construction                                                        |
|                  |           |  | Quality of education                                                                                       | No information                                                                        | 1                                      | 0                                                                                  | 0                                                                               | 1  | No change                                                                                                             |
|                  |           |  | Dropouts rates                                                                                             | High risk                                                                             | 0                                      | -1                                                                                 | 0                                                                               | -1 | Of 45 members, 18 of them are either dropped out of education or never attended ( which is 40% of total sample)       |
|                  |           |  | Level of Female Education                                                                                  | High drop outs                                                                        | 0                                      | -1                                                                                 | 0                                                                               | -1 | of 22 members, 8 of them are dropped outs and 9 of them never attended school                                         |

| Potential Assets |                    |                  | Indicators of Measurements (Many of these need to be studies as changes between before and after the move) | Existing Risks/Opportunities (Status Quo)                                 | Risks Reduced/Risks Avoided (Benefits) | Continuing Risks (Opportunity Costs for the project/Residual Costs for the people) | Risks Created (short and long-term) (macro and micro narratives of development) |    | Notes                                                                                                                                                     |
|------------------|--------------------|------------------|------------------------------------------------------------------------------------------------------------|---------------------------------------------------------------------------|----------------------------------------|------------------------------------------------------------------------------------|---------------------------------------------------------------------------------|----|-----------------------------------------------------------------------------------------------------------------------------------------------------------|
| 3                | Social Safety nets |                  | FORMAL : Knowledge of Entitlements and channels                                                            | No much information                                                       | 1                                      | 0                                                                                  | 0                                                                               | 1  | They know and have access to certain entitlements provided by state government ex 9/11 have either BPL or ration card and all of them have gas connection |
|                  |                    |                  | INFORMAL : Structure and channels                                                                          | No much information                                                       | 1                                      | 0                                                                                  | 0                                                                               | 1  | Avoided risk by not moving them to a different location. They have strong networks and channels : ex: access to informal credit sources                   |
| 4                | Networks           |                  | Neighbourhood relations                                                                                    | It was Close knit community                                               | 0                                      | 0                                                                                  | -1                                                                              | -1 | lost connections between social networks ex: neighbours were allocated elsewhere in the other block                                                       |
|                  |                    |                  | Collective Activities (Social benefits/Economic benefits/Religious benefits)                               | Low risk (Within communities - would help neighbours within their groups) | 0                                      | 0                                                                                  | -1                                                                              | -1 | They used to help each other in daily activities ex: getting vegetables from market, looking after kids when they use to live next to each other          |
| 5                | Family Extensions  | Family structure | One or multiple households/Joint family                                                                    | Joint families                                                            | 0                                      | 0                                                                                  | -1                                                                              | -1 | Joint families to nuclear families. Old aged people or parents started living separately - size of the new house                                          |

| Potential Assets |   |                     | Indicators of Measurements (Many of these need to be studies as changes between before and after the move) | Existing Risks/Opportunities (Status Quo)               | Risks Reduced/Risks Avoided (Benefits) | Continuing Risks (Opportunity Costs for the project/Residual Costs for the people) | Risks Created (short and long-term) (macro and micro narratives of development) |    | Notes                                                                                                                                                                                                  |
|------------------|---|---------------------|------------------------------------------------------------------------------------------------------------|---------------------------------------------------------|----------------------------------------|------------------------------------------------------------------------------------|---------------------------------------------------------------------------------|----|--------------------------------------------------------------------------------------------------------------------------------------------------------------------------------------------------------|
|                  |   | Women               | Household structure/ Head of family                                                                        | No much information                                     | 1                                      | 0                                                                                  | 0                                                                               | 1  | Some of the women have got pattas in their name. Allocation of house name may not indicate who takes the major decisions in the family, but the status quo can also remain the same in this situation. |
|                  |   | Older People        | Family support structure                                                                                   | Used to stay together in one house                      | 0                                      | 0                                                                                  | -1                                                                              | -1 | Older people started living separately because of which they had to start earning and could not depend on their children                                                                               |
|                  |   | Children            | Support by Anganwadis                                                                                      | No information                                          | 1                                      | 0                                                                                  | 0                                                                               | 1  | Anganwadi run by private institution in the neighbouring colony of ASR Nagar                                                                                                                           |
|                  |   | Physically disabled | Access to entitlements                                                                                     | No information                                          | 0                                      | 0                                                                                  | 0                                                                               | 0  |                                                                                                                                                                                                        |
|                  |   |                     | Levels of compensations in project                                                                         | No information                                          | 0                                      | 0                                                                                  | 0                                                                               | 0  |                                                                                                                                                                                                        |
|                  | 6 | Community Structure | Collective assets                                                                                          | Dhobi ghat - operation and maintenance by the residents | 1                                      | 0                                                                                  | 0                                                                               | 1  | Have avoided risk by not demolishing or relocating from the existing location                                                                                                                          |



| Potential Assets                |                     |                                                     | Indicators of Measurements (Many of these need to be studies as changes between before and after the move) | Existing Risks/Opportunities (Status Quo)                               | Risks Reduced/Risks Avoided (Benefits) | Continuing Risks (Opportunity Costs for the project/Residual Costs for the people) | Risks Created (short and long-term) (macro and micro narratives of development) |    | Notes                                                                                                              |
|---------------------------------|---------------------|-----------------------------------------------------|------------------------------------------------------------------------------------------------------------|-------------------------------------------------------------------------|----------------------------------------|------------------------------------------------------------------------------------|---------------------------------------------------------------------------------|----|--------------------------------------------------------------------------------------------------------------------|
| 7                               | Psychological risks | Privacy, Dignity, Safety against crime and conflict | Memory, Manifestation of shock, Insecurity (Stress) [Stratified sampling]                                  | Low risk                                                                | 1                                      | 0                                                                                  | 0                                                                               | 1  | Safe structures wrt cyclones, compared to what it was earlier - others also have taken shelter in these structures |
|                                 |                     |                                                     | Safety                                                                                                     | No much information                                                     | 1                                      | 0                                                                                  | 0                                                                               | 1  | People are used to live that location - risk avoided by in situ development                                        |
|                                 |                     |                                                     | Toilets for women - use, location and number                                                               | High Risk - Open defecation - public toilets only built few years back. | 1                                      | 0                                                                                  | 0                                                                               | 1  | risk avoided by construction of toilets - they used to go for open defecation before                               |
|                                 |                     |                                                     | Transit housing quality and standards, Project considerations for cultural sensitivities                   | High risk - people temporarily moved across the highway                 | 0                                      | 0                                                                                  | -1                                                                              | -1 | No provisions for rent provided                                                                                    |
| 8                               | Cultural practices  |                                                     | Rituals and festivals                                                                                      | No much information                                                     | 1                                      | 0                                                                                  | 0                                                                               | 1  | Avoided by in situ construction                                                                                    |
| Physical stock, (flow = access) |                     |                                                     |                                                                                                            |                                                                         | 20                                     | -7                                                                                 | 0                                                                               | 13 |                                                                                                                    |
| 1                               | Buildings           | Before and after relocation                         | Type of roof/ type of walls/ plinth                                                                        | Temporary materials - Exposed to risks and damages during cyclones      | 1                                      | 0                                                                                  | 0                                                                               | 1  | RCC structures                                                                                                     |
|                                 |                     |                                                     | Housing typology/form                                                                                      | Squatters - high density                                                | 1                                      | 0                                                                                  | 0                                                                               | 1  | G+3                                                                                                                |
|                                 |                     | Household level - built-up area                     | Modifications on provided/ modifications allowed                                                           | No much information                                                     | 1                                      | 0                                                                                  | 0                                                                               | 1  | Whoever could afford have made modifications                                                                       |

| Potential Assets |                |                 | Indicators of Measurements (Many of these need to be studies as changes between before and after the move) | Existing Risks/Opportunities (Status Quo) | Risks Reduced/Risks Avoided (Benefits) | Continuing Risks (Opportunity Costs for the project/Residual Costs for the people) | Risks Created (short and long-term) (macro and micro narratives of development) |    | Notes                                                                          |
|------------------|----------------|-----------------|------------------------------------------------------------------------------------------------------------|-------------------------------------------|----------------------------------------|------------------------------------------------------------------------------------|---------------------------------------------------------------------------------|----|--------------------------------------------------------------------------------|
|                  |                | Household level | Size of the plot and covered area                                                                          | No much information                       | 0                                      | -1                                                                                 | 0                                                                               | -1 | Small size                                                                     |
| 2                | Public systems | Water           | Quality/frequency/service provider                                                                         | Low Risk                                  | 0                                      | -1                                                                                 | 0                                                                               | -1 | No mention of such issues                                                      |
|                  |                |                 | Type of supply                                                                                             | Hand pumps + public water taps + well     | 0                                      | -1                                                                                 | 0                                                                               | -1 | Connections have to be installed but families have made alternate arrangements |
|                  |                | Sanitation      | Type of disposal (before and after)                                                                        | Open defecation                           | 1                                      | 0                                                                                  | 0                                                                               | 1  | Septic tanks                                                                   |
|                  |                |                 | Type of toilet/location                                                                                    | Open defecation/public toilet             | 1                                      | 0                                                                                  | 0                                                                               | 1  | Attached toilets                                                               |
|                  |                |                 | Planning priorities and design                                                                             | None exists                               | 1                                      | 0                                                                                  | 0                                                                               | 1  | Attached toilets                                                               |
|                  |                | Solid waste     | Collection system/disposal system                                                                          | None exists                               | 0                                      | -1                                                                                 | 0                                                                               | -1 | No solid waste system in place                                                 |
|                  |                |                 | Reuse (approaches at local level)                                                                          | No mention of such issues                 | 0                                      | -1                                                                                 | 0                                                                               | -1 | No plans for solid waste disposal                                              |
|                  |                | Electricity     | Source/type of usage                                                                                       | No connections                            | 1                                      | 0                                                                                  | 0                                                                               | 1  | Have got connections                                                           |
|                  |                |                 | Reliability / resilience (opportunity/risk)                                                                |                                           | 0                                      | -1                                                                                 | 0                                                                               | -1 | Highly dependent for water pumps + frequent power cuts                         |
|                  |                | Energy          | Consumption pattern (positive or negative)                                                                 | used to depend of firewood                | 1                                      | 0                                                                                  | 0                                                                               | 1  | All of them have got gas connections now                                       |
|                  |                | Transport       | Type of roads                                                                                              | Main road is made of cement, rest is mud  | 1                                      | 0                                                                                  | 0                                                                               | 1  | All concrete roads                                                             |

| Potential Assets |               |                         | Indicators of Measurements (Many of these need to be studies as changes between before and after the move) | Existing Risks/Opportunities (Status Quo)                          | Risks Reduced/Risks Avoided (Benefits) | Continuing Risks (Opportunity Costs for the project/Residual Costs for the people) | Risks Created (short and long-term) (macro and micro narratives of development) |    | Notes                                                                         |
|------------------|---------------|-------------------------|------------------------------------------------------------------------------------------------------------|--------------------------------------------------------------------|----------------------------------------|------------------------------------------------------------------------------------|---------------------------------------------------------------------------------|----|-------------------------------------------------------------------------------|
|                  |               |                         | Availability of public transportation                                                                      | No change - they have access to public transportation              | 1                                      | 0                                                                                  | 0                                                                               | 1  | Avoided by in situ construction                                               |
|                  |               | Communication/ICT       | Early warning systems                                                                                      | Government made announcements before cyclone                       | 1                                      | 0                                                                                  | 0                                                                               | 1  | Have access to tv/radio/mobile and is centrally located in the city           |
|                  |               | Social infrastructure   | Health/education/information centre/temple                                                                 | Government school, Dhobi ghat, temple located adjacent to the site | 1                                      | 0                                                                                  | 0                                                                               | 1  | New community centre was built as part of the project                         |
|                  |               | Critical infrastructure | Resilience                                                                                                 | KV and government primary school                                   | 1                                      | 0                                                                                  | 0                                                                               | 1  | Two schools - KV and a Government School located adjacent to the site         |
| 3                | O & M         |                         | Community/individual/government/private                                                                    | No information                                                     | 0                                      | 0                                                                                  | 0                                                                               | 0  |                                                                               |
|                  |               | Reliability             | Resources available (ex: staff)                                                                            | No information                                                     | 0                                      | 0                                                                                  | 0                                                                               | 0  |                                                                               |
| 4                | Land          |                         | Productivity/tenure/inundation/expenditure                                                                 | No tenure                                                          | 1                                      | 0                                                                                  | 0                                                                               | 1  | Non-alienable pattas                                                          |
|                  |               |                         | Site location/quality of soil/hazard exposure/distance from previous site                                  | centrally located in the city next to the highway/safe from surge  | 1                                      | 0                                                                                  | 0                                                                               | 1  | Avoided by in situ construction                                               |
| 5                | Public spaces |                         | Types of public spaces                                                                                     | One temple adjacent to the site, gather on the street              | 1                                      | 0                                                                                  | 0                                                                               | 1  | Have created a community centre                                               |
|                  |               |                         | Play area availability and access                                                                          | Play on the streets and in the school                              | 0                                      | -1                                                                                 | 0                                                                               | -1 | No designated space - unsafe for kids because of the highway next to the site |

| Potential Assets |                                      |                 | Indicators of Measurements (Many of these need to be studies as changes between before and after the move) | Existing Risks/Opportunities (Status Quo)      | Risks Reduced/Risks Avoided (Benefits) | Continuing Risks (Opportunity Costs for the project/Residual Costs for the people) | Risks Created (short and long-term) (macro and micro narratives of development) |    | Notes                                                                   |
|------------------|--------------------------------------|-----------------|------------------------------------------------------------------------------------------------------------|------------------------------------------------|----------------------------------------|------------------------------------------------------------------------------------|---------------------------------------------------------------------------------|----|-------------------------------------------------------------------------|
|                  |                                      |                 | Available/ usage                                                                                           | High                                           | 1                                      | 0                                                                                  | 0                                                                               | 1  | No change                                                               |
|                  |                                      |                 | Proximity                                                                                                  | Very close                                     | 1                                      | 0                                                                                  | 0                                                                               | 1  | No change                                                               |
| 6                | Trees and natural capital            |                 | Kind of ownership/type                                                                                     |                                                | 0                                      | 0                                                                                  | 0                                                                               | 0  |                                                                         |
|                  |                                      |                 | Utility - (ecological balance/livelihood/quality of life)                                                  |                                                | 0                                      | 0                                                                                  | 0                                                                               | 0  |                                                                         |
| 7                | No of assets                         |                 | Productive/life line assets                                                                                | No much information                            | 1                                      | 0                                                                                  | 0                                                                               | 1  | Use houses as small shops and some own autos                            |
|                  |                                      |                 | Kind of ownership/usage                                                                                    | No much information                            | 1                                      | 0                                                                                  | 0                                                                               | 1  | Most of them have pattas to their houses                                |
| Economic         |                                      |                 |                                                                                                            |                                                | 11.5                                   | -7.5                                                                               | 0                                                                               | 4  |                                                                         |
| 1                | Livelihoods - nature and composition | Type            | Formal/informal                                                                                            | Informal                                       | 0                                      | -1                                                                                 | 0                                                                               | -1 | no change of economic activity                                          |
|                  |                                      |                 | Self-employed/daily wage labour                                                                            | Daily wage and self - employed                 | 0                                      | -1                                                                                 | 0                                                                               | -1 | still continuing the same work                                          |
|                  |                                      |                 | Diversity of income                                                                                        | Yes, very diversified                          | 0.5                                    | -0.5                                                                               | 0                                                                               | 0  | Some of have started small shops etc., in the houses that they have got |
|                  |                                      | Household level | Sole/multiple earners                                                                                      | More than one person on an average are earners | 1                                      | 0                                                                                  | 0                                                                               | 1  | No change                                                               |
|                  |                                      |                 | Gender perspective                                                                                         | Equal                                          | 1                                      | 0                                                                                  | 0                                                                               | 1  | No change                                                               |
|                  |                                      | Labour          | Skill and education status                                                                                 | traditional skills                             | 0                                      | -1                                                                                 | 0                                                                               | -1 | No change - some women have tailoring skills, but no opportunity        |

| Potential Assets |                                      |  | Indicators of Measurements (Many of these need to be studies as changes between before and after the move) | Existing Risks/Opportunities (Status Quo)                    | Risks Reduced/Risks Avoided (Benefits) | Continuing Risks (Opportunity Costs for the project/Residual Costs for the people) | Risks Created (short and long-term) (macro and micro narratives of development) |    | Notes                                                                   |
|------------------|--------------------------------------|--|------------------------------------------------------------------------------------------------------------|--------------------------------------------------------------|----------------------------------------|------------------------------------------------------------------------------------|---------------------------------------------------------------------------------|----|-------------------------------------------------------------------------|
| 2                | Pattern of consumption               |  | Type and quantum of savings                                                                                | No much information                                          | 1                                      | 0                                                                                  | 0                                                                               | 1  | most of them have access to bank accounts                               |
|                  | Marketable and non-marketable assets |  | Usage and type (Ex: refrigerator, car )                                                                    | No much information                                          | 1                                      | 0                                                                                  | 0                                                                               | 1  | most of them electronic goods, mobile, 2 wheelers, some own autos       |
|                  |                                      |  | Economic asset ownership patterns                                                                          | No much information                                          | 1                                      | 0                                                                                  | 0                                                                               | 1  | No change in ownership - likely to invest with no investment on housing |
|                  |                                      |  | House ownership                                                                                            | no house/land pattas before                                  | 1                                      | 0                                                                                  | 0                                                                               | 1  | Have got pattas for the new house                                       |
| 3                | Access to financial services         |  | Type (formal, informal)                                                                                    | Both formal and informal - bank accounts and social networks | 1                                      | 0                                                                                  | 0                                                                               | 1  | Bank accounts for all                                                   |
|                  |                                      |  | How they access                                                                                            | Social Networks and formal channels                          | 1                                      | 0                                                                                  | 0                                                                               | 1  | No change                                                               |
| 4                | Financial/capital investments        |  | Mutual funds/bonds/savings - all channels but liquid                                                       | no savings                                                   | 0                                      | -1                                                                                 | 0                                                                               | -1 | no savings                                                              |
|                  |                                      |  | House/land/other assets                                                                                    | no pattas                                                    | 1                                      | 0                                                                                  | 0                                                                               | 1  | New house and patta                                                     |
| 5                | Risk transfer and sharing            |  | Formal and informal (SHG, local chit funds, other channels)                                                | Informal                                                     | 1                                      | 0                                                                                  | 0                                                                               | 1  | No change                                                               |
|                  |                                      |  | Insurance - micro/business                                                                                 | No                                                           | 0                                      | -1                                                                                 | 0                                                                               | -1 | No insurance                                                            |

| Potential Assets |                               |                      | Indicators of Measurements (Many of these need to be studies as changes between before and after the move)             | Existing Risks/Opportunities (Status Quo) | Risks Reduced/Risks Avoided (Benefits) | Continuing Risks (Opportunity Costs for the project/Residual Costs for the people) | Risks Created (short and long-term) (macro and micro narratives of development) |    | Notes                                    |
|------------------|-------------------------------|----------------------|------------------------------------------------------------------------------------------------------------------------|-------------------------------------------|----------------------------------------|------------------------------------------------------------------------------------|---------------------------------------------------------------------------------|----|------------------------------------------|
|                  |                               |                      | Insurance - life (health, accident)/ non-life (endowment, child, building, crop, vehicle, fire, catastrophic, weather) | No                                        | 0                                      | -1                                                                                 | 0                                                                               | -1 | No insurance                             |
|                  |                               |                      | Insurance - asset/output based                                                                                         | No                                        | 0                                      | -1                                                                                 | 0                                                                               | -1 | No insurance                             |
|                  |                               |                      | Cooperative/ individual arrangements                                                                                   | Yes                                       | 1                                      | 0                                                                                  | 0                                                                               | 1  | No change                                |
| Environmental    |                               |                      |                                                                                                                        |                                           | 4                                      | -2                                                                                 | 0                                                                               | 2  |                                          |
| 1                | Quality and quantity of water |                      | Scenario - before and after                                                                                            | No mention of such issues                 | 1                                      | 0                                                                                  | 0                                                                               | 1  | No change                                |
|                  |                               | State of environment | Primary and secondary impacts on individuals                                                                           | No much information                       | 1                                      | 0                                                                                  | 0                                                                               | 1  | No water related problems issues         |
|                  |                               | source               | Surface water/ground water                                                                                             | Ground water                              | 0                                      | -1                                                                                 | 0                                                                               | -1 | No change                                |
| 2                | Quality of air                |                      | Secondary level impacts on individuals ( ex: health, respiratory problems)                                             | No mention of such issues                 | 0                                      | -1                                                                                 | 0                                                                               | -1 | located next to highway                  |
| 3                | Green cover                   |                      | Type of vegetation                                                                                                     | Urban plantation                          | 1                                      | 0                                                                                  | 0                                                                               | 1  | some loss after hud-hud but growing back |
|                  |                               |                      | Proportion of green cover                                                                                              | Low/Sparse                                | 1                                      | 0                                                                                  | 0                                                                               | 1  | No change                                |
| 4                | Biodiversity                  |                      | Secondary level impacts on individuals (narrative)                                                                     | None                                      | 0                                      | 0                                                                                  | 0                                                                               | 0  | No change                                |

| Potential Assets                                |  |                         | Indicators of Measurements (Many of these need to be studies as changes between before and after the move) | Existing Risks/Opportunities (Status Quo)        | Risks Reduced/Risks Avoided (Benefits) | Continuing Risks (Opportunity Costs for the project/Residual Costs for the people) | Risks Created (short and long-term) (macro and micro narratives of development) |    | Notes                                                                                                                                                            |
|-------------------------------------------------|--|-------------------------|------------------------------------------------------------------------------------------------------------|--------------------------------------------------|----------------------------------------|------------------------------------------------------------------------------------|---------------------------------------------------------------------------------|----|------------------------------------------------------------------------------------------------------------------------------------------------------------------|
| Institutional/Governance and regulatory (I/G/R) |  |                         |                                                                                                            |                                                  | 1                                      | -0.5                                                                               | -0.5                                                                            | 0  |                                                                                                                                                                  |
| 1                                               |  |                         | Types of existing institutions (Formal/informal)                                                           | No much information                              | 1                                      | 0                                                                                  | 0                                                                               | 1  | housing society                                                                                                                                                  |
| 2                                               |  | Risk created by (I/G/R) | National/state/district level                                                                              | None                                             | 0                                      | 0                                                                                  | 0                                                                               | 0  |                                                                                                                                                                  |
|                                                 |  |                         | Differential impacts on other groups (community based, old aged/marginalised populations)                  | High (different caste based groups)              | 0                                      | -0.5                                                                               | -0.5                                                                            | -1 | Lack of sufficient entitlements for the marginalised (old and disabled in particular) continues + new issues created because of allotment of houses only to some |
| 3                                               |  | Risk to (I/G/R)         | Decision leading to risks                                                                                  | None                                             | 0                                      | 0                                                                                  | 0                                                                               | 0  |                                                                                                                                                                  |
| Quality of Life and Political agency            |  |                         |                                                                                                            |                                                  | 4                                      | -2                                                                                 | 0                                                                               | 2  |                                                                                                                                                                  |
|                                                 |  |                         | Access to public transportation                                                                            | low risk                                         | 1                                      | 0                                                                                  | 0                                                                               | 1  | No change + next to highway                                                                                                                                      |
|                                                 |  |                         | Access to primary, secondary and tertiary education                                                        | High Risk ( only primary education is available) | 0                                      | -1                                                                                 | 0                                                                               | -1 | schools across the highway are not accessible                                                                                                                    |
|                                                 |  |                         | Access to public spaces                                                                                    |                                                  | 1                                      | 0                                                                                  | 0                                                                               | 1  | Community centre                                                                                                                                                 |
|                                                 |  |                         | Access to public distribution system/any other sources                                                     | some of them have access to BPL/ration cards     | 1                                      | 0                                                                                  | 0                                                                               | 1  | no change                                                                                                                                                        |
|                                                 |  |                         | Access to adequate health facilities                                                                       | High risk (only a nursing home in the vicinity)  | 0                                      | -1                                                                                 | 0                                                                               | -1 | no change                                                                                                                                                        |
|                                                 |  |                         | Access to entitlements                                                                                     |                                                  | 1                                      | 0                                                                                  | 0                                                                               | 1  | house patta for most                                                                                                                                             |
|                                                 |  |                         |                                                                                                            |                                                  | 51.5                                   | -24                                                                                | -5.5                                                                            | 22 |                                                                                                                                                                  |
