# Supplementary material
Source: MDPI journal article supplement (https://www.mdpi.com/2071-1050/12/15/5958)
Supplement: s1 [file s1]

## MASTER SHEET – CIRF PROJECT

|                               |                               |   |                                                         |                                           |  |
|-------------------------------|-------------------------------|---|---------------------------------------------------------|-------------------------------------------|--|
| <b>A. General Information</b> |                               |   |                                                         | Survey Start time - hour/mins - am/pm     |  |
| 1                             | S. No                         |   |                                                         | Case/ type of settlement/ team/ sample no |  |
| 2                             | Survey Date - date/month/year |   |                                                         | Interviewer/ Translator/ Documentor       |  |
| 3                             | Where do you stay now?        |   |                                                         | Where did you stay before relocation?     |  |
| 6                             | Type of responder             | 1 | Non-beneficiaries                                       | Total no of working members               |  |
|                               |                               | 2 | Beneficiaries of in-situ housing upgradation            | Total no of family members                |  |
|                               |                               | 3 | Beneficiaries in the process of relocation              | Owner/ Renter/ Alooted/ Illegal           |  |
|                               |                               | 4 | Relocated/resettled beneficiaries                       |                                           |  |
|                               |                               | 5 | Beneficiaries identified for infrastructure upgradation |                                           |  |
|                               |                               | 6 | Beneficiaries identified for relocation                 |                                           |  |
|                               |                               | 0 | For ALL / Ask everyone                                  |                                           |  |

|      | 0    | 0         | 0   | 0                            | 0                  | 0                               | 0                                  | 0                              | 0                                          | 4, 3                                                 | 4, 3                                 | 4, 3                          |
|------|------|-----------|-----|------------------------------|--------------------|---------------------------------|------------------------------------|--------------------------------|--------------------------------------------|------------------------------------------------------|--------------------------------------|-------------------------------|
| S.no | Name | Sex (M/F) | Age | Currently in School (Yes/No) | Level of Education | Dropped out of school (Yes, No) | Reasons for dropping out of school | Are you working now? (Yes, No) | What kind of work are you involved in now? | Did you do the same work before moving? (Yes, N, NA) | If not, then what did you do before? | Why Did you change your work? |
| 1    |      |           |     |                              |                    |                                 |                                    |                                |                                            |                                                      |                                      |                               |
| 2    |      |           |     |                              |                    |                                 |                                    |                                |                                            |                                                      |                                      |                               |
| 3    |      |           |     |                              |                    |                                 |                                    |                                |                                            |                                                      |                                      |                               |
| 4    |      |           |     |                              |                    |                                 |                                    |                                |                                            |                                                      |                                      |                               |
| 5    |      |           |     |                              |                    |                                 |                                    |                                |                                            |                                                      |                                      |                               |
| 6    |      |           |     |                              |                    |                                 |                                    |                                |                                            |                                                      |                                      |                               |
|      |      |           |     |                              |                    |                                 |                                    |                                |                                            |                                                      |                                      |                               |

| Options for level of education : Please enter number code accordingly |                                                                        |    |                                                          |
|-----------------------------------------------------------------------|------------------------------------------------------------------------|----|----------------------------------------------------------|
| 1                                                                     | Illiterate                                                             | 7  | Non technical diploma or certificate not equal to degree |
| 2                                                                     | Below Primary                                                          | 8  | Technical diploma or certificate not equal to degree     |
| 3                                                                     | Primary ( 1st - 4th)                                                   | 9  | Graduate and above                                       |
| 4                                                                     | Middle ( 5th - 7th)                                                    | 10 | DKCS                                                     |
| 5                                                                     | Matriculation/Secondary (8th - 10th)                                   | 11 | DNA                                                      |
| 6                                                                     | High secondary/ Intermediate/ PreUniversity/ Senior Secondary ( +1/+2) | 12 | Yet to Start                                             |

| Options for reasons for dropping out of school : Please enter number code accordingly |                                        |    |                  |
|---------------------------------------------------------------------------------------|----------------------------------------|----|------------------|
| 1                                                                                     | Financial Reasons                      | 6  | DNA              |
| 2                                                                                     | Health related - including handicapped | 7  | DKCS             |
| 3                                                                                     | Family didn't allow                    | 8  | Never Attended   |
| 4                                                                                     | Marriage                               | 9  | NA               |
| 5                                                                                     | No interest                            | 10 | After Relocation |

**FAMILY INFORMATION (EVERYONE)**

|                                        |                                                                                                                                                                                                         |                                                                                                                                                                                                                                                                                                                                                                                                                                |                                                                                                                                                                                                                                                                                                                                                                                                                                                                                                   |                                    |                                     |                              |                                       |                               |                                        |                             |
|----------------------------------------|---------------------------------------------------------------------------------------------------------------------------------------------------------------------------------------------------------|--------------------------------------------------------------------------------------------------------------------------------------------------------------------------------------------------------------------------------------------------------------------------------------------------------------------------------------------------------------------------------------------------------------------------------|---------------------------------------------------------------------------------------------------------------------------------------------------------------------------------------------------------------------------------------------------------------------------------------------------------------------------------------------------------------------------------------------------------------------------------------------------------------------------------------------------|------------------------------------|-------------------------------------|------------------------------|---------------------------------------|-------------------------------|----------------------------------------|-----------------------------|
| <p><b>0</b></p>                        | <p><b>Since when</b> have you been <b>living in this city/ town/ neighbourhood?</b></p> <p><i>H: App is sahar me kab se rah rahe hain?</i></p> <p><i>T: Meeru ee vurilo yapudu nunchi vuntunaru</i></p> | <p><input type="checkbox"/> &lt;1 year</p> <p><input type="checkbox"/> 1- 5 years</p> <p><input type="checkbox"/> 5 - 10 years</p> <p><input type="checkbox"/> 10 - 50 years</p> <p><input type="checkbox"/> 50 + years</p>                                                                                                                                                                                                    | <p><input type="checkbox"/> DKCS</p> <p><input type="checkbox"/> DNA</p> <p><input type="checkbox"/> NA</p>                                                                                                                                                                                                                                                                                                                                                                                       |                                    |                                     |                              |                                       |                               |                                        |                             |
| <p><b>0</b></p>                        | <p><b>Since when</b> have you been <b>living in this house?</b></p> <p><i>H: Is ghar mein aap kab se rah rahe hain?</i></p> <p><i>T: Ee intilo yapudu nunchi vuntunaru</i></p>                          | <p><input type="checkbox"/> &lt;1 year</p> <p><input type="checkbox"/> 1- 5 years</p> <p><input type="checkbox"/> 5 - 10 years</p> <p><input type="checkbox"/> 10 - 50 years</p> <p><input type="checkbox"/> 50 + years</p>                                                                                                                                                                                                    | <p><input type="checkbox"/> DKCS</p> <p><input type="checkbox"/> DNA</p> <p><input type="checkbox"/> NA</p>                                                                                                                                                                                                                                                                                                                                                                                       |                                    |                                     |                              |                                       |                               |                                        |                             |
| <p><b>4</b><br/><b>3</b></p>           | <p>Did you move together as a community or only your family?</p> <p><i>T: Meetho patu mee chuttupakkavalu kuda illu maripoyara?</i></p>                                                                 | <p><input type="checkbox"/> As entire community</p> <p><input type="checkbox"/> As part of a community</p> <p><input type="checkbox"/> As a family</p> <p><input type="checkbox"/> No</p>                                                                                                                                                                                                                                      | <p><input type="checkbox"/> DKCS</p> <p><input type="checkbox"/> DNA</p> <p><input type="checkbox"/> NA</p>                                                                                                                                                                                                                                                                                                                                                                                       |                                    |                                     |                              |                                       |                               |                                        |                             |
| <p><b>4</b></p>                        | <p>How long did you live in the original house?</p> <p><i>H: Aap purani jagh par kitne time rahe?</i></p> <p><i>T: Mee pata intilo yenni savachralu vunaru</i></p>                                      | <table border="0"> <tr> <td><input type="checkbox"/> &lt;1 year</td> <td><input type="checkbox"/> 50+ years</td> </tr> <tr> <td><input type="checkbox"/> 1- 5 years</td> <td><input type="checkbox"/> DNA</td> </tr> <tr> <td><input type="checkbox"/> 5 - 10 years</td> <td><input type="checkbox"/> DKCS</td> </tr> <tr> <td><input type="checkbox"/> 10 - 50 years</td> <td><input type="checkbox"/> NA</td> </tr> </table> | <input type="checkbox"/> <1 year                                                                                                                                                                                                                                                                                                                                                                                                                                                                  | <input type="checkbox"/> 50+ years | <input type="checkbox"/> 1- 5 years | <input type="checkbox"/> DNA | <input type="checkbox"/> 5 - 10 years | <input type="checkbox"/> DKCS | <input type="checkbox"/> 10 - 50 years | <input type="checkbox"/> NA |
| <input type="checkbox"/> <1 year       | <input type="checkbox"/> 50+ years                                                                                                                                                                      |                                                                                                                                                                                                                                                                                                                                                                                                                                |                                                                                                                                                                                                                                                                                                                                                                                                                                                                                                   |                                    |                                     |                              |                                       |                               |                                        |                             |
| <input type="checkbox"/> 1- 5 years    | <input type="checkbox"/> DNA                                                                                                                                                                            |                                                                                                                                                                                                                                                                                                                                                                                                                                |                                                                                                                                                                                                                                                                                                                                                                                                                                                                                                   |                                    |                                     |                              |                                       |                               |                                        |                             |
| <input type="checkbox"/> 5 - 10 years  | <input type="checkbox"/> DKCS                                                                                                                                                                           |                                                                                                                                                                                                                                                                                                                                                                                                                                |                                                                                                                                                                                                                                                                                                                                                                                                                                                                                                   |                                    |                                     |                              |                                       |                               |                                        |                             |
| <input type="checkbox"/> 10 - 50 years | <input type="checkbox"/> NA                                                                                                                                                                             |                                                                                                                                                                                                                                                                                                                                                                                                                                |                                                                                                                                                                                                                                                                                                                                                                                                                                                                                                   |                                    |                                     |                              |                                       |                               |                                        |                             |
| <p><b>4</b></p>                        | <p>Did everyone in your original community get allocated in the same relocation site?</p> <p><i>T: meetho paatu me me parisarallo unna vallki kuda illu ochinda?</i></p>                                | <p><input type="checkbox"/> Yes <input type="checkbox"/> DNA</p> <p><input type="checkbox"/> No <input type="checkbox"/> DKCS</p> <p><input type="checkbox"/> NA</p>                                                                                                                                                                                                                                                           |                                                                                                                                                                                                                                                                                                                                                                                                                                                                                                   |                                    |                                     |                              |                                       |                               |                                        |                             |
| <p><b>0</b></p>                        | <p>(Did/ Do) you <b>want a new house?</b> - YES/No – if yes, What Kind?</p> <p><i>H : Kya aap naya ghar chahte the?</i></p> <p><i>T: meeku government echee kotha illu kavali ani unda?</i></p>         | <p><input type="checkbox"/> Yes - Insitu</p> <p><input type="checkbox"/> Yes - Relocation</p> <p><input type="checkbox"/> Yes – Any kind</p> <p><input type="checkbox"/> No</p> <p><input type="checkbox"/> DNA</p> <p><input type="checkbox"/> DKCS</p> <p><input type="checkbox"/> NA</p>                                                                                                                                    | <p>If yes - What are the reasons</p> <p><input type="checkbox"/> House not strong</p> <p><input type="checkbox"/> Area not sufficient</p> <p><input type="checkbox"/> Want patta and safe</p> <p><input type="checkbox"/> Renting</p> <p><input type="checkbox"/> Got but want in-situ</p> <p><input type="checkbox"/> Should support work</p> <p><input type="checkbox"/> Other services like toilets schools, etc.</p> <p><input type="checkbox"/> DNA</p> <p><input type="checkbox"/> DKCS</p> |                                    |                                     |                              |                                       |                               |                                        |                             |

# MASTER SHEET – CIRF PROJECT

|             |                                                                                                             |                                                    |                                            |  |
|-------------|-------------------------------------------------------------------------------------------------------------|----------------------------------------------------|--------------------------------------------|--|
| 4<br>3<br>2 | (Are/ Were) you happy with the NEW house that you got?                                                      | <input type="checkbox"/> Yes                       | <input type="checkbox"/> DNA               |  |
|             | T: Meeku sarkaru ichina illu nachinda                                                                       | <input type="checkbox"/> No                        | <input type="checkbox"/> DKCS              |  |
|             |                                                                                                             | <input type="checkbox"/> NA                        |                                            |  |
| 4<br>3      | What motivated you to relocate from old site?<br><br>T: Meeru patha intiloki nduku vellali ani anipinchindi | <input type="checkbox"/> Own house                 | <input type="checkbox"/> Better facilities |  |
|             |                                                                                                             | <input type="checkbox"/> Safe house                | <input type="checkbox"/> Can't afford rent |  |
|             |                                                                                                             | <input type="checkbox"/> Forcibly evicted          | <input type="checkbox"/> DKCS              |  |
|             |                                                                                                             | <input type="checkbox"/> Better livelihood options | <input type="checkbox"/> NA                |  |
|             |                                                                                                             |                                                    | <input type="checkbox"/> DNA               |  |
|             |                                                                                                             |                                                    |                                            |  |

|                                      |                                |    |                         |                        |      |     |
|--------------------------------------|--------------------------------|----|-------------------------|------------------------|------|-----|
| 0                                    | Do you face any problems here? |    |                         |                        |      |     |
| <i>Livelihood/ economic ativity</i>  | Yes                            | No | Earlier yes but not now | Earlier no but now yes | DKCS | DNA |
| <i>Rent</i>                          | Yes                            | No | Earlier yes but not now | Earlier no but now yes | DKCS | DNA |
| <i>Housing</i>                       | Yes                            | No | Earlier yes but not now | Earlier no but now yes | DKCS | DNA |
| <i>Water</i>                         | Yes                            | No | Earlier yes but not now | Earlier no but now yes | DKCS | DNA |
| <i>Sanitation</i>                    | Yes                            | No | Earlier yes but not now | Earlier no but now yes | DKCS | DNA |
| <i>Electricity</i>                   | Yes                            | No | Earlier yes but not now | Earlier no but now yes | DKCS | DNA |
| <i>Health</i>                        | Yes                            | No | Earlier yes but not now | Earlier no but now yes | DKCS | DNA |
| <i>Education</i>                     | Yes                            | No | Earlier yes but not now | Earlier no but now yes | DKCS | DNA |
| <i>Transport/Access</i>              | Yes                            | No | Earlier yes but not now | Earlier no but now yes | DKCS | DNA |
| <i>Community/ Living with family</i> | Yes                            | No | Earlier yes but not now | Earlier no but now yes | DKCS | DNA |
| <i>Others</i>                        | Yes                            | No | Earlier yes but not now | Earlier no but now yes | DKCS | DNA |

|                                     |                                               |    |                         |                        |      |     |
|-------------------------------------|-----------------------------------------------|----|-------------------------|------------------------|------|-----|
| 4                                   | What were the problems in your original site? |    |                         |                        |      |     |
| <i>Livelihood/ economic ativity</i> | Yes                                           | No | Earlier yes but not now | Earlier no but now yes | DKCS | DNA |
| <i>Rent</i>                         | Yes                                           | No | Earlier yes but not now | Earlier no but now yes | DKCS | DNA |
| <i>Housing</i>                      | Yes                                           | No | Earlier yes but not now | Earlier no but now yes | DKCS | DNA |
| <i>Water</i>                        | Yes                                           | No | Earlier yes but not now | Earlier no but now yes | DKCS | DNA |
| <i>Sanitation</i>                   | Yes                                           | No | Earlier yes but not now | Earlier no but now yes | DKCS | DNA |
| <i>Electricity</i>                  | Yes                                           | No | Earlier yes but not now | Earlier no but now yes | DKCS | DNA |

# MASTER SHEET – CIRF PROJECT

|                               |     |    |                         |                        |      |     |
|-------------------------------|-----|----|-------------------------|------------------------|------|-----|
| Health                        | Yes | No | Earlier yes but not now | Earlier no but now yes | DKCS | DNA |
| Education                     | Yes | No | Earlier yes but not now | Earlier no but now yes | DKCS | DNA |
| Transport/Access              | Yes | No | Earlier yes but not now | Earlier no but now yes | DKCS | DNA |
| Community/ Living with family | Yes | No | Earlier yes but not now | Earlier no but now yes | DKCS | DNA |
| Others                        | Yes | No | Earlier yes but not now | Earlier no but now yes | DKCS | DNA |

|                               |                                                           |    |                         |                        |      |     |
|-------------------------------|-----------------------------------------------------------|----|-------------------------|------------------------|------|-----|
| <b>3</b>                      | What problems are you likely to face in the new location? |    |                         |                        |      |     |
| Livelihood/ economic ativity  | Yes                                                       | No | Earlier yes but not now | Earlier no but now yes | DKCS | DNA |
| Rent                          | Yes                                                       | No | Earlier yes but not now | Earlier no but now yes | DKCS | DNA |
| Housing                       | Yes                                                       | No | Earlier yes but not now | Earlier no but now yes | DKCS | DNA |
| Water                         | Yes                                                       | No | Earlier yes but not now | Earlier no but now yes | DKCS | DNA |
| Sanitation                    | Yes                                                       | No | Earlier yes but not now | Earlier no but now yes | DKCS | DNA |
| Electricity                   | Yes                                                       | No | Earlier yes but not now | Earlier no but now yes | DKCS | DNA |
| Health                        | Yes                                                       | No | Earlier yes but not now | Earlier no but now yes | DKCS | DNA |
| Education                     | Yes                                                       | No | Earlier yes but not now | Earlier no but now yes | DKCS | DNA |
| Transport/Access              | Yes                                                       | No | Earlier yes but not now | Earlier no but now yes | DKCS | DNA |
| Community/ Living with family | Yes                                                       | No | Earlier yes but not now | Earlier no but now yes | DKCS | DNA |
| Others                        | Yes                                                       | No | Earlier yes but not now | Earlier no but now yes | DKCS | DNA |

|                      |                                                                                                                                                                                                                                                                               |                                                                                                                                                                                                                                                                    |  |
|----------------------|-------------------------------------------------------------------------------------------------------------------------------------------------------------------------------------------------------------------------------------------------------------------------------|--------------------------------------------------------------------------------------------------------------------------------------------------------------------------------------------------------------------------------------------------------------------|--|
| <b>4</b><br><b>2</b> | <p>Did you <b>live</b> in a <b>joint family</b> before relocation/ in-situ?</p> <p><i>H: Is naye makaan mein aane se pahle aap apne pure parivar/ sankut parivar ke saath rahte the?</i></p> <p><i>T: Ee Intiki Maaraka mundu me kutumbam antha okadegera vunday vara</i></p> | <input type="checkbox"/> Yes<br><input type="checkbox"/> DKCS<br><input type="checkbox"/> No<br><input type="checkbox"/> DNA<br><input type="checkbox"/> NA<br><input type="checkbox"/> Earlier yes but not now<br><input type="checkbox"/> Earlier no but now yes |  |
| <b>4</b>             | <p>Are there any family members staying in previous location?</p> <p><i>T: Mee patha inti degra me bandulu inka akkadae unnara?</i></p>                                                                                                                                       | <input type="checkbox"/> Yes <input type="checkbox"/> DNA<br><input type="checkbox"/> No <input type="checkbox"/> DKCS<br><input type="checkbox"/> Earlier yes but not now<br><input type="checkbox"/> Earlier no but now yes                                      |  |

# MASTER SHEET – CIRF PROJECT

|             |                                                                                                                                                                                                              |                                                                                                                                                                                                                                                                                     |                                                                                                                                                            |
|-------------|--------------------------------------------------------------------------------------------------------------------------------------------------------------------------------------------------------------|-------------------------------------------------------------------------------------------------------------------------------------------------------------------------------------------------------------------------------------------------------------------------------------|------------------------------------------------------------------------------------------------------------------------------------------------------------|
| 4<br>2<br>3 | <p>Has there been a change in how older family members stayed from before and now?</p> <p>T: Meeru illu maripoyaka Mee intlo peedavallu methone untunara</p>                                                 | <input type="checkbox"/> Together before not after<br><input type="checkbox"/> Together after not Before<br><input type="checkbox"/> No change<br><input type="checkbox"/> None <input type="checkbox"/> DNA<br><input type="checkbox"/> DKCS<br><input type="checkbox"/> DNA       |                                                                                                                                                            |
| O           | <p>Who makes <b>major decision</b> in your family?</p> <p>H: <i>Aapke parivar me hone wale zruri/ pramukh nirnay kon leta hain?</i></p> <p>T: <i>Mee intilo mukhyamainya nirnayalu avaru tesukuntaru</i></p> | <input type="checkbox"/> Father<br><input type="checkbox"/> Mother<br><input type="checkbox"/> Husband<br><input type="checkbox"/> Wife<br><input type="checkbox"/> Elder Child<br><input type="checkbox"/> Family<br><input type="checkbox"/> DNA<br><input type="checkbox"/> DKCS | <p>What kind?</p> <input type="checkbox"/> Financial<br><input type="checkbox"/> Household level – expenditure<br><input type="checkbox"/> Others<br>_____ |

## ALTERNATE SOURCE OF INCOME - (EVERYONE)

|   |                                                                                                                                                                         |                                                                                                                                                                                                     |
|---|-------------------------------------------------------------------------------------------------------------------------------------------------------------------------|-----------------------------------------------------------------------------------------------------------------------------------------------------------------------------------------------------|
| O | <p>Do you have an additional source of income?</p> <p>H: <i>Paise kamane ka koi aur sadhan hai?</i></p> <p>T: <i>Idi kakunda inka yekadina adanapu adayam vunda</i></p> | <input type="checkbox"/> Yes<br><input type="checkbox"/> No <input type="checkbox"/> DNA<br><input type="checkbox"/> DKCS                                                                           |
| O | <p>If yes, what is it? (Type of work / income)</p> <p>H: <i>Agar haan, kya sadhan hai?</i></p> <p>T: <i>Avunu, iyetay ... yamiti adi</i></p>                            |                                                                                                                                                                                                     |
| 4 | <p>Did you have an additional source of income before relocation?</p> <p>T: <i>Meeku deniki mundu meeru chasay pani kakunda inka amiyina adayam vunday dha</i></p>      | <input type="checkbox"/> Yes<br><input type="checkbox"/> No<br><input type="checkbox"/> Same as before <input type="checkbox"/> DNA<br><input type="checkbox"/> DKCS<br><input type="checkbox"/> NA |

LOSSES

|                                      |                                                                                                                                                                                                                 |                                                                                                                                                                                                                                                                                    |                                                                                                                                                                                                                           |
|--------------------------------------|-----------------------------------------------------------------------------------------------------------------------------------------------------------------------------------------------------------------|------------------------------------------------------------------------------------------------------------------------------------------------------------------------------------------------------------------------------------------------------------------------------------|---------------------------------------------------------------------------------------------------------------------------------------------------------------------------------------------------------------------------|
| 4                                    | Where were you living during Phailin/Hud Hud?<br><br><i>T: meeru Hud Hud ochina time lo ekkada unnaru?</i>                                                                                                      | <input type="checkbox"/> Relocation Site<br><input type="checkbox"/> Original location<br><input type="checkbox"/> DKCS<br><input type="checkbox"/> DNA<br><input type="checkbox"/> NA                                                                                             |                                                                                                                                                                                                                           |
| O                                    | Did you <b>find out</b> about <b>Phailin/ Hud Hud</b> in <b>advance</b> ?<br><br><i>H: Kya aapko Hud Hudntufaan ke baare mein pahle se pata tha</i><br><br><i>T: Meeku Hud Hud ela telsukunaru</i>              | <input type="checkbox"/> Yes <input type="checkbox"/> DNA<br><input type="checkbox"/> No <input type="checkbox"/> DKCS                                                                                                                                                             |                                                                                                                                                                                                                           |
| O                                    | If yes, then how?<br><br><i>T: ela</i>                                                                                                                                                                          | <input type="checkbox"/> TV/ Radio<br><input type="checkbox"/> Government Announcement<br><input type="checkbox"/> Neighbours/Relatives<br><input type="checkbox"/> Others<br><input type="checkbox"/> DKCS<br><input type="checkbox"/> DNA                                        |                                                                                                                                                                                                                           |
| O                                    | Where did you stay during Phailin/Hud Hud?<br><br><i>T: meeru Hud Hud ochinapudu ekkada unnaru</i>                                                                                                              | <input type="checkbox"/> Same House<br><input type="checkbox"/> Friends/Relatives/Neighbours<br><input type="checkbox"/> Government School / Cyclone Shelter<br><input type="checkbox"/> Private Buildings/ Others<br><input type="checkbox"/> NA<br><input type="checkbox"/> DKCS |                                                                                                                                                                                                                           |
| <b>Housing losses due to Hud Hud</b> |                                                                                                                                                                                                                 |                                                                                                                                                                                                                                                                                    |                                                                                                                                                                                                                           |
|                                      |                                                                                                                                                                                                                 | House                                                                                                                                                                                                                                                                              | Roof                                                                                                                                                                                                                      |
| O                                    | Did your current <b>house face losses</b> during Phailin/Hud Hud?<br><br><i>H: Hud Hudi/ hudhud tufaan ke samay aapko koi nuksaan hua?</i><br><br><i>T: Hud Hud valla mee intiki ami iyna nasatalu vachayaa</i> | <input type="checkbox"/> Complete Damage<br><input type="checkbox"/> Partial Damage<br><input type="checkbox"/> No Damage<br><input type="checkbox"/> DNA<br><input type="checkbox"/> DKCS<br><input type="checkbox"/> NA                                                          | <input type="checkbox"/> Complete Damage<br><input type="checkbox"/> Partial Damage<br><input type="checkbox"/> No Damage<br><input type="checkbox"/> DNA<br><input type="checkbox"/> DKCS<br><input type="checkbox"/> NA |
| O                                    | Amount spent on reconstruction/<br><b>recovery</b><br><br><i>H: Aapko kitna kharcha karna pada firse sab cheese theek karne mein?</i>                                                                           | <input type="checkbox"/> _____<br><input type="checkbox"/> DNA<br><input type="checkbox"/> DKCS                                                                                                                                                                                    | <input type="checkbox"/> Complete Damage<br><input type="checkbox"/> Partial Damage<br><input type="checkbox"/> No Damage<br><input type="checkbox"/> DNA<br><input type="checkbox"/> DKCS<br><input type="checkbox"/> NA |

**MASTER SHEET – CIRF PROJECT**

|                      |                                                                                                                                                                                                                              |                                                                                                                                                                                                                                                                                                   |  |
|----------------------|------------------------------------------------------------------------------------------------------------------------------------------------------------------------------------------------------------------------------|---------------------------------------------------------------------------------------------------------------------------------------------------------------------------------------------------------------------------------------------------------------------------------------------------|--|
|                      | <i>T: Hud Hud tarvatha mee inti marmatulu ki yentha karchu iynadi</i>                                                                                                                                                        | <input type="checkbox"/> NA                                                                                                                                                                                                                                                                       |  |
| <b>O</b>             | How long did it take for reconstruction?<br><br><i>T: meeru illu malli eda vidiga kattukovadaniki enta samayam pattindi</i>                                                                                                  | <input type="checkbox"/> < 1 week<br><input type="checkbox"/> 1 - 2 weeks<br><input type="checkbox"/> More than 2 weeks<br><input type="checkbox"/> Still living in the damaged house<br><input type="checkbox"/> Still affected<br><input type="checkbox"/> DNA<br><input type="checkbox"/> DKCS |  |
| <b>4<br/>3<br/>2</b> | Did your previous house face losses during cyclone?<br><br><i>T: Edi varaku mee patha illu emaina nattapoina</i>                                                                                                             | <input type="checkbox"/> Yes <input type="checkbox"/> DNA<br><input type="checkbox"/> No <input type="checkbox"/> DKCS<br><input type="checkbox"/> NA                                                                                                                                             |  |
| <b>O</b>             | Did you receive any <b>compensation</b> after cyclone from the government?<br><br><i>H: Kya aapko tufaan ke baad sarkaar ki traf se koi muavaja mila?</i><br><br><i>T: Mee intni maramatulu ku ami iyna sahayam vachinda</i> | <input type="checkbox"/> Yes <input type="checkbox"/> DNA<br><input type="checkbox"/> No <input type="checkbox"/> DKCS<br><input type="checkbox"/> NA                                                                                                                                             |  |
| <b>O</b>             | What kind?<br><br><i>T: em echaru</i>                                                                                                                                                                                        | <input type="checkbox"/> Standard Package _____<br><input type="checkbox"/> Othergoods - Taurpalin, Solar Lantern – Others<br><input type="checkbox"/> Extra money after damage asesment/ after pursual                                                                                           |  |

| Drinking water and sanitation problems due to Hud Hud – FOR EVERYONE |                                                                                                                                                                                                                                                                                 |                                                                                                                                                                                                                                                                    |                                                                                                                                           |
|----------------------------------------------------------------------|---------------------------------------------------------------------------------------------------------------------------------------------------------------------------------------------------------------------------------------------------------------------------------|--------------------------------------------------------------------------------------------------------------------------------------------------------------------------------------------------------------------------------------------------------------------|-------------------------------------------------------------------------------------------------------------------------------------------|
| O                                                                    | <b>(Drinking Water)</b><br>Did you face <b>trouble</b> for drinking water during Phailin/Hud Hud?<br><br><i>H: Hud Hud tuffan ke samay pine ke paani ki koi samsaya aai thi?</i><br><br><i>T: Hud Hud vala meeku tragay neeti kortha vahinda ?</i>                              | <input type="checkbox"/> Yes <input type="checkbox"/> DNA<br><input type="checkbox"/> No <input type="checkbox"/> DKCS                                                                                                                                             |                                                                                                                                           |
| O                                                                    | How long?<br><br><i>T: enni rojulu</i>                                                                                                                                                                                                                                          | <input type="checkbox"/> < 1 week<br><input type="checkbox"/> 1 - 2 weeks<br><input type="checkbox"/> More than 2 weeks<br><input type="checkbox"/> Still affected<br><input type="checkbox"/> NA<br><input type="checkbox"/> DKCS<br><input type="checkbox"/> DNA | Details<br><input type="checkbox"/> Stored water before<br><input type="checkbox"/> Bought water<br><input type="checkbox"/> Others _____ |
| O                                                                    | <b>(Defecation)</b><br>Did you face <b>trouble</b> for defecation during Phailin/Hud Hud?<br><br><i>H: Hud Hud tuffan ke samay shochalye se sambandhi koi samsaya aai thi?</i><br><br><i>T: Hud Hud toofanu samayam lo meeku marugu dodiki veladam lo elanti kastalu vachay</i> | <input type="checkbox"/> Yes <input type="checkbox"/> DNA<br><input type="checkbox"/> No <input type="checkbox"/> DKCS                                                                                                                                             |                                                                                                                                           |
| O                                                                    | How Long<br><br><i>T: enni rojulu</i>                                                                                                                                                                                                                                           | <input type="checkbox"/> < 1 week<br><input type="checkbox"/> 1 - 2 weeks<br><input type="checkbox"/> More than 2 weeks<br><input type="checkbox"/> Still affected<br><input type="checkbox"/> NA<br><input type="checkbox"/> DKCS                                 | Details<br><input type="checkbox"/> Toilet available at home<br><input type="checkbox"/> Others _____                                     |
| O                                                                    | <b>(Electricity )</b><br>Did you face trouble accesing electricity during / after Phailin/Hud Hud?<br><i>T: Hud Hud toofanu samayam lo meeku karentu undadam lo elanti kastalu vachay</i>                                                                                       | <input type="checkbox"/> Yes<br><input type="checkbox"/> No<br><input type="checkbox"/> DNA<br><input type="checkbox"/> DKCS<br><input type="checkbox"/> NA                                                                                                        |                                                                                                                                           |
| O                                                                    | How Long<br><br><i>T: enni rojulu</i>                                                                                                                                                                                                                                           | <input type="checkbox"/> < 1 week<br><input type="checkbox"/> 1 - 2 weeks                                                                                                                                                                                          | Details                                                                                                                                   |



**MASTER SHEET – CIRF PROJECT**

|   |                                                                                                                                                                                               |                                                                                                                                                             |                                                                                                                                                                                                                                                                                                                                     |
|---|-----------------------------------------------------------------------------------------------------------------------------------------------------------------------------------------------|-------------------------------------------------------------------------------------------------------------------------------------------------------------|-------------------------------------------------------------------------------------------------------------------------------------------------------------------------------------------------------------------------------------------------------------------------------------------------------------------------------------|
|   |                                                                                                                                                                                               | <input type="checkbox"/> More than 2 weeks<br><input type="checkbox"/> Still affected<br><input type="checkbox"/> NA<br><input type="checkbox"/> DKCS       |                                                                                                                                                                                                                                                                                                                                     |
| O | <b>(Education)</b><br>Did kids education get affected / after Phailin/Hud Hud?<br><br><i>T: Hud Hud toofanu samayam lo mee pillala school ki velladaniki elanti ebandalu ochai</i>            | <input type="checkbox"/> Yes<br><input type="checkbox"/> No<br><input type="checkbox"/> DNA<br><input type="checkbox"/> DKCS<br><input type="checkbox"/> NA | If Yes, <b>How long was the school closed? Details</b><br><i>T: enni rojulu school ki vellalaedu</i><br><br><input type="checkbox"/> < 1 week<br><input type="checkbox"/> 1 - 2 weeks<br><input type="checkbox"/> More than 2 weeks<br><input type="checkbox"/> DNA<br><input type="checkbox"/> NA<br><input type="checkbox"/> DKCS |
|   | <b>Details?</b>                                                                                                                                                                               |                                                                                                                                                             |                                                                                                                                                                                                                                                                                                                                     |
| O | <b>(Transportation and Access)</b><br>Did you face problems to commute / after Phailin/Hud Hud?<br><br><i>T: Hud Hud toofanu samayam lo meeru bhyataki velladaniki elanti ebbandulu ochai</i> | <input type="checkbox"/> Yes<br><input type="checkbox"/> No<br><input type="checkbox"/> DNA<br><input type="checkbox"/> DKCS<br><input type="checkbox"/> NA | If yes, for how long? Details<br><br><input type="checkbox"/> < 1 week<br><input type="checkbox"/> 1 - 2 weeks<br><input type="checkbox"/> More than 2 weeks<br><input type="checkbox"/> DNA<br><input type="checkbox"/> NA<br><input type="checkbox"/> DKCS                                                                        |
|   | <b>Details?</b>                                                                                                                                                                               |                                                                                                                                                             |                                                                                                                                                                                                                                                                                                                                     |
| O |                                                                                                                                                                                               |                                                                                                                                                             |                                                                                                                                                                                                                                                                                                                                     |

| Agriculture- losses due to Phailin/ Hud Hud |                                                                                                                                                                                                                 |                                                                                                                                                             |  |
|---------------------------------------------|-----------------------------------------------------------------------------------------------------------------------------------------------------------------------------------------------------------------|-------------------------------------------------------------------------------------------------------------------------------------------------------------|--|
| O                                           | Did your <b>farm face losses</b> during Phailin / HudHud?<br><br><i>H: Phailin/ hudhud tufaan ke samay kheti-badi mein nuksaan hua?</i><br><br><i>T: Phailin valla mee panta ki yemi iyna nastalu vachinaya</i> | <input type="checkbox"/> Yes<br><input type="checkbox"/> No<br><input type="checkbox"/> DKCS<br><input type="checkbox"/> DNA<br><input type="checkbox"/> NA |  |
|                                             | If yes, Amount of loss in rupees<br><br><i>H: Agar haan, kitne paiso ka nuksaan hua?</i><br><br><i>T: Oka vela nastam vastay, yentha nasta, vachindi ?</i>                                                      | <input type="checkbox"/> _____<br><input type="checkbox"/> DNA<br><input type="checkbox"/> DKCS                                                             |  |

|          |                                                                                                                                                                                                    |                                                                                                                                                                                                                                    |
|----------|----------------------------------------------------------------------------------------------------------------------------------------------------------------------------------------------------|------------------------------------------------------------------------------------------------------------------------------------------------------------------------------------------------------------------------------------|
|          |                                                                                                                                                                                                    | <input type="checkbox"/> NA                                                                                                                                                                                                        |
| <b>O</b> | <p>Amount spent on <b>recovery</b>?</p> <p><i>H: Nuksaan ki vasuli mein kitna kharch hua?</i></p> <p><i>T: Nastam nunchi kolukovadaniki yenhta karchu iynadi ?</i></p>                             |                                                                                                                                                                                                                                    |
| <b>O</b> | <p>How long the <b>agriculture</b> activity was <b>got affected</b>?</p> <p><i>H: Kitne samay tak kheti-baadi ka kaam band raha?</i></p> <p><i>T: Mee vayasayam yeni rojulu nastapoyindi ?</i></p> | <input type="checkbox"/> < 1 week<br><input type="checkbox"/> 1 - 2 weeks<br><input type="checkbox"/> More than 2 weeks<br><input type="checkbox"/> Still affected<br><input type="checkbox"/> NA<br><input type="checkbox"/> DKCS |

| Horticulture - losses due to Phailin/ Hud Hud |                                                                                                                                                                                                                               |                                                                                                                                                                                                                                    |
|-----------------------------------------------|-------------------------------------------------------------------------------------------------------------------------------------------------------------------------------------------------------------------------------|------------------------------------------------------------------------------------------------------------------------------------------------------------------------------------------------------------------------------------|
| <b>O</b>                                      | <p>Did your trees &amp; plants face losses during Phailin / HudHud?</p> <p><i>H: Phailin/ hudhud tufaan ke samay kheti-badi mein nuksaan hua?</i></p> <p><i>T: Phailin valla mee panta ki yemi iyna nastalu vachinaya</i></p> | <input type="checkbox"/> Yes<br><input type="checkbox"/> No<br><input type="checkbox"/> DKCS<br><input type="checkbox"/> DNA<br><input type="checkbox"/> NA                                                                        |
| <b>O</b>                                      | <p>If yes, Amount of loss in rupees</p> <p><i>H: Agar haan, kitne paiso ka nuksaan hua?</i></p> <p><i>T: Oka vela nastam vastay, yentha nasta, vachindi ?</i></p>                                                             | <input type="checkbox"/> _____<br><input type="checkbox"/> DNA<br><input type="checkbox"/> DKCS<br><input type="checkbox"/> NA                                                                                                     |
| <b>O</b>                                      | <p>Amount spent on <b>recovery</b>?</p> <p><i>H: Nuksaan ki vasuli mein kitna kharch hua?</i></p> <p><i>T: Nastam nunchi kolukovadaniki yenhta karchu iynadi ?</i></p>                                                        |                                                                                                                                                                                                                                    |
| <b>O</b>                                      | <p>How long was the horticulture affected?</p> <p><i>H: Kitne samay tak kheti-baadi ka kaam band raha?</i></p> <p><i>T: Mee vayasayam yeni rojulu nastapoyindi ?</i></p>                                                      | <input type="checkbox"/> < 1 week<br><input type="checkbox"/> 1 - 2 weeks<br><input type="checkbox"/> More than 2 weeks<br><input type="checkbox"/> Still affected<br><input type="checkbox"/> NA<br><input type="checkbox"/> DKCS |

| Fishing - losses due to Phailin/ Hud Hud |                                                                                                                                                                                                                                                                            |                                                                                                                                                                                                                                    |
|------------------------------------------|----------------------------------------------------------------------------------------------------------------------------------------------------------------------------------------------------------------------------------------------------------------------------|------------------------------------------------------------------------------------------------------------------------------------------------------------------------------------------------------------------------------------|
| <b>O</b>                                 | <p>Did your <b>fishing activity/ boats/ nets, etc</b> face <b>losses</b> during Phailin / HudHud?</p> <p><i>H: Phailin/ Hudhud tufaan ke samay machli pakdne mein koi nuksaan hua?</i></p> <p><i>T: Phailin vala meeku chapalu patadam yeni iyna koratha vachinda?</i></p> | <input type="checkbox"/> Yes<br><input type="checkbox"/> No<br><input type="checkbox"/> DNA<br><input type="checkbox"/> DKCS<br><input type="checkbox"/> NA                                                                        |
| <b>O</b>                                 | <p>If yes, <b>Amount of loss</b> in rupees</p> <p><i>H: Agar haan, kitne paion ka nuksaan hua?</i></p> <p><i>T: Korta vala yentha nastam vachindi ?</i></p>                                                                                                                | <input type="checkbox"/> _____<br><input type="checkbox"/> DNA<br><input type="checkbox"/> DKCS<br><input type="checkbox"/> NA                                                                                                     |
| <b>O</b>                                 | <p>Amount spent on reconstruction/ <b>recovery</b>?</p> <p><i>H: Nuksaan ko pura karne ke liye kine paiso ka kharcha hua?</i></p> <p><i>T: Nasatm nunchi korukodaniki yentha karchu iynadi ?</i></p>                                                                       |                                                                                                                                                                                                                                    |
| <b>O</b>                                 | <p>How long was the <b>fishing activity</b> affected?</p> <p><i>H: Kitne samaye tak machali pakdne ka kaam band raha?</i></p> <p><i>T: Chapalu veta yemi iyna agipoyindi ?</i></p>                                                                                         | <input type="checkbox"/> < 1 week<br><input type="checkbox"/> 1 - 2 weeks<br><input type="checkbox"/> More than 2 weeks<br><input type="checkbox"/> Still affected<br><input type="checkbox"/> NA<br><input type="checkbox"/> DKCS |

| (If any other profession like business - Alternate sources of livelihood) - losses due to Phailin/ Hud Hud |                                                                                                                                                                                                                                     |                                                                                                                                                                                                                                                                                                                                                                                    |
|------------------------------------------------------------------------------------------------------------|-------------------------------------------------------------------------------------------------------------------------------------------------------------------------------------------------------------------------------------|------------------------------------------------------------------------------------------------------------------------------------------------------------------------------------------------------------------------------------------------------------------------------------------------------------------------------------------------------------------------------------|
| <b>O</b>                                                                                                   | <p>Did you <b>face losses at work</b> during Phailin/Hud Hud?</p> <p><i>H: Hud Hudtufaan ke samay kisi aur kaam ka nuksaan hua?</i></p> <p><i>T: Hud Hud / hudhud vala meeku pani ki veladaniki ami iyna nastam kaliginda ?</i></p> | <div> <input type="checkbox"/> Yes<br/> <input type="checkbox"/> No<br/> <input type="checkbox"/> DNA<br/> <input type="checkbox"/> DKCS<br/> <input type="checkbox"/> NA         </div> <div> <p>Amount of loss in rupees</p> <input type="checkbox"/> _____<br/> <input type="checkbox"/> DNA<br/> <input type="checkbox"/> DKCS<br/> <input type="checkbox"/> NA         </div> |

|   |                                                                                                                                       |                                                                                                                                                                                                                         |
|---|---------------------------------------------------------------------------------------------------------------------------------------|-------------------------------------------------------------------------------------------------------------------------------------------------------------------------------------------------------------------------|
| O | What kind of losses did you face ?                                                                                                    | If yes, for how long? Details                                                                                                                                                                                           |
|   | <input type="checkbox"/> Loss of work days<br><input type="checkbox"/> Equipment Damage<br><input type="checkbox"/> Workplace damaged | <input type="checkbox"/> < 1 week<br><input type="checkbox"/> 1 - 2 weeks<br><input type="checkbox"/> More than 2 weeks<br><input type="checkbox"/> DNA<br><input type="checkbox"/> NA<br><input type="checkbox"/> DKCS |

| ASSETS |                                                                                                                                                                |                                                                                                                                                                                                                                       |                                                                                                                                                             |                                                                                                                                                             |
|--------|----------------------------------------------------------------------------------------------------------------------------------------------------------------|---------------------------------------------------------------------------------------------------------------------------------------------------------------------------------------------------------------------------------------|-------------------------------------------------------------------------------------------------------------------------------------------------------------|-------------------------------------------------------------------------------------------------------------------------------------------------------------|
|        |                                                                                                                                                                | Household assets                                                                                                                                                                                                                      | Work related assets                                                                                                                                         | Others                                                                                                                                                      |
| 4      | Did your assets got damaged/lost after relocation?<br><br><i>T: Illu mare samapyamlo mee viluvaina vastuvulu emaina nastapoyara?</i>                           | <input type="checkbox"/> Yes<br><input type="checkbox"/> No<br><input type="checkbox"/> DNA<br><input type="checkbox"/> DKCS<br><input type="checkbox"/> NA                                                                           | <input type="checkbox"/> Yes<br><input type="checkbox"/> No<br><input type="checkbox"/> DNA<br><input type="checkbox"/> DKCS<br><input type="checkbox"/> NA | <input type="checkbox"/> Yes<br><input type="checkbox"/> No<br><input type="checkbox"/> DNA<br><input type="checkbox"/> DKCS<br><input type="checkbox"/> NA |
| O      | Did your assets get damaged/lost after Phailin/Hud Hud?                                                                                                        | Household assets                                                                                                                                                                                                                      | Work related assets                                                                                                                                         | Others                                                                                                                                                      |
|        | <i>T: Hud Hud samapyamlo mee viluvaina vastuvulu emaina nastapoyara?</i>                                                                                       | <input type="checkbox"/> Yes<br><input type="checkbox"/> No<br><input type="checkbox"/> DNA<br><input type="checkbox"/> DKCS<br><input type="checkbox"/> NA                                                                           | <input type="checkbox"/> Yes<br><input type="checkbox"/> No<br><input type="checkbox"/> DNA<br><input type="checkbox"/> DKCS<br><input type="checkbox"/> NA | <input type="checkbox"/> Yes<br><input type="checkbox"/> No<br><input type="checkbox"/> DNA<br><input type="checkbox"/> DKCS<br><input type="checkbox"/> NA |
| O      | Did you carry /place anything safe with you when you (evacuated) during phailin / Hud Hud?<br><br><i>T: Hud Hud samapyamlo meetho meeru e mem pattukellaru</i> | <input type="checkbox"/> Documents<br><input type="checkbox"/> Cloths<br><input type="checkbox"/> Food<br><input type="checkbox"/> Work related assets<br><input type="checkbox"/> Others<br><input type="checkbox"/> Didn't evacuate |                                                                                                                                                             |                                                                                                                                                             |

| 4, 2, 3     | RISK SHARING – Relocation specific                                                                                                                       |                                                                                                                                                                                                                                                                                                        |                                                                                                                                                                                                                         |
|-------------|----------------------------------------------------------------------------------------------------------------------------------------------------------|--------------------------------------------------------------------------------------------------------------------------------------------------------------------------------------------------------------------------------------------------------------------------------------------------------|-------------------------------------------------------------------------------------------------------------------------------------------------------------------------------------------------------------------------|
| 4<br>2<br>3 | Did you seek help from any one after relocation?                                                                                                         | <input type="checkbox"/> Yes <input type="checkbox"/> DNA<br><input type="checkbox"/> No <input type="checkbox"/> DKCS<br><input type="checkbox"/> NA                                                                                                                                                  |                                                                                                                                                                                                                         |
| 4<br>2<br>3 | If yes, from whom?<br><i>H: Agar haan, kis se madat maangi?</i><br><i>T: Adigitay avarini adigaru</i>                                                    | <input type="checkbox"/> Government<br><input type="checkbox"/> Relatives/ Friends/ Neighbours<br><input type="checkbox"/> Employer<br><input type="checkbox"/> Money lender<br><input type="checkbox"/> Other Institutions                                                                            | <input type="checkbox"/> Community<br><input type="checkbox"/> Others<br><input type="checkbox"/> DKCS<br><input type="checkbox"/> DNA<br><input type="checkbox"/> NA                                                   |
| 4<br>2<br>3 | If yes, what kind of help?<br><i>H: Agar haan, kaisi madat maangi?</i><br><i>T: Yelanti madatu adigaru ?</i>                                             | <input type="checkbox"/> Money<br><input type="checkbox"/> In kind<br><input type="checkbox"/> Labour<br><input type="checkbox"/> Place to stay/cook<br><input type="checkbox"/> Others<br><input type="checkbox"/> DNA<br><input type="checkbox"/> NA                                                 |                                                                                                                                                                                                                         |
| 4<br>2<br>3 | Did you <b>borrow loan</b> ? (loan if has to be repaid)<br><i>H: Aapne kisi sanstha se udhaar liya?</i><br><i>T: Yekadinunchi iyna appu tesukunara ?</i> | <input type="checkbox"/> Yes<br><input type="checkbox"/> No<br><input type="checkbox"/> DNA<br><input type="checkbox"/> DKCS<br><input type="checkbox"/> NA                                                                                                                                            | Details of the loan<br><i>H: Kitna udhar liya?</i><br><i>T: Yentha appu chasaru ?</i><br><input type="checkbox"/> _____<br><input type="checkbox"/> DNA<br><input type="checkbox"/> DKCS<br><input type="checkbox"/> NA |
| 4<br>2<br>3 | What was the <b>interest</b> /Interest rate?<br><i>H: Kitne bayaj par udhar mila?</i><br><i>T: Vaadi yentha padinidi mee appu ki</i>                     | Percentage :<br><input type="checkbox"/> 1 <input type="checkbox"/> 5 or more<br><input type="checkbox"/> 2 <input type="checkbox"/> no interest<br><input type="checkbox"/> 3 <input type="checkbox"/> DNA<br><input type="checkbox"/> 4 <input type="checkbox"/> DKCS<br><input type="checkbox"/> NA |                                                                                                                                                                                                                         |

| RISK SHARING – After Phailin/ Hud Hud - EVERYONE |                                                                                                                                                                                                                                                                                                                                       |                                                                                                                                                                                                                                                                                                        |                                                                                                                                                                                                                                 |
|--------------------------------------------------|---------------------------------------------------------------------------------------------------------------------------------------------------------------------------------------------------------------------------------------------------------------------------------------------------------------------------------------|--------------------------------------------------------------------------------------------------------------------------------------------------------------------------------------------------------------------------------------------------------------------------------------------------------|---------------------------------------------------------------------------------------------------------------------------------------------------------------------------------------------------------------------------------|
| O                                                | Did you seek help from any one after cyclone?                                                                                                                                                                                                                                                                                         | <input type="checkbox"/> Yes <input type="checkbox"/> DNA<br><input type="checkbox"/> No <input type="checkbox"/> DKCS                                                                                                                                                                                 |                                                                                                                                                                                                                                 |
| O                                                | If yes, from whom?<br><i>H: Agar haan, kis se madat maangi?</i><br><i>T: Adigitay avarini adigaru</i>                                                                                                                                                                                                                                 | <input type="checkbox"/> Government<br><input type="checkbox"/> Relatives/ Friends/ Neighbours<br><input type="checkbox"/> Employer<br><input type="checkbox"/> Money lender<br><input type="checkbox"/> Other Institutions<br><input type="checkbox"/> NA                                             |                                                                                                                                                                                                                                 |
| O                                                | If yes, what kind of help?<br><i>H: Agar haan, kaisi madat maangi?</i><br><i>T: Yelanti madatu adigaru ?</i>                                                                                                                                                                                                                          | <input type="checkbox"/> Money<br><input type="checkbox"/> In kind<br><input type="checkbox"/> Labour<br><input type="checkbox"/> Place to stay/cook<br><input type="checkbox"/> Others<br><input type="checkbox"/> NA                                                                                 |                                                                                                                                                                                                                                 |
| O                                                | Did you <b>borrow loan</b> ? (loan if has to be repaid)<br><i>H: Aapne kisi sanstha se udhaar liya?</i><br><i>T: Yekadinunchi iyna appu tesukunara ?</i>                                                                                                                                                                              | <input type="checkbox"/> Yes<br><input type="checkbox"/> No<br><input type="checkbox"/> DNA<br><input type="checkbox"/> DKCS<br><input type="checkbox"/> NA                                                                                                                                            | Details of the loan<br><i>H: Kitna udhar liya?</i><br><br><i>T: Yentha appu chasaru ?</i><br><br><input type="checkbox"/> _____<br><input type="checkbox"/> DNA<br><input type="checkbox"/> DKCS<br><input type="checkbox"/> NA |
| O                                                | What was the <b>interest</b> /Interest rate?<br><i>H: Kitne bayaj par udhar mila?</i><br><i>T: Vaadi yentha padinidi mee appu ki</i>                                                                                                                                                                                                  | Percentage :<br><input type="checkbox"/> 1 <input type="checkbox"/> 5 or more<br><input type="checkbox"/> 2 <input type="checkbox"/> no interest<br><input type="checkbox"/> 3 <input type="checkbox"/> DNA<br><input type="checkbox"/> 4 <input type="checkbox"/> DKCS<br><input type="checkbox"/> NA |                                                                                                                                                                                                                                 |
| O                                                | If you were to find out today that there is a cyclone [tomorrow] what actions would you take?<br><br><i>H: Agar aapko pata lage ki aaj ya kal firse tufaan/ chakrwat aane wala hain to aap us se bachne ke liye kya karoge?</i><br><br><i>T: Meeku koni gantalu lo toofanu vastadi ani telistay meeru ami charoyalu tesukuntaru ?</i> | <input type="checkbox"/> Stay in the same place<br><input type="checkbox"/> Move to safe shelter<br><input type="checkbox"/> DNA<br><input type="checkbox"/> DKCS<br><input type="checkbox"/> NA<br><input type="checkbox"/> We will do what community does                                            |                                                                                                                                                                                                                                 |

# MASTER SHEET – CIRF PROJECT

|          |                                                                                                                                                  |                                                                                                                                                                                 |
|----------|--------------------------------------------------------------------------------------------------------------------------------------------------|---------------------------------------------------------------------------------------------------------------------------------------------------------------------------------|
| <b>O</b> | What will you carry/ protect along with you?                                                                                                     | <input type="checkbox"/> Documents<br><input type="checkbox"/> Food<br><input type="checkbox"/> Other HH items<br><input type="checkbox"/> No action                            |
| <b>O</b> | If you learn that there will be a cyclone [every year] what actions would you take?<br><br><i>T: Prati savamcham ami chariyalu tesukuntaru ?</i> | <input type="checkbox"/> No Change<br><input type="checkbox"/> Move permanently<br><input type="checkbox"/> DNA<br><input type="checkbox"/> DKCS<br><input type="checkbox"/> NA |

## SAVINGS - (EVERYONE)

|          |                                                                                                                                                        |                                                                                                                                                                                                                                                                                                                                                             |                                                                                              |
|----------|--------------------------------------------------------------------------------------------------------------------------------------------------------|-------------------------------------------------------------------------------------------------------------------------------------------------------------------------------------------------------------------------------------------------------------------------------------------------------------------------------------------------------------|----------------------------------------------------------------------------------------------|
| <b>O</b> | Do you have a bank account?<br><br><i>H: Kya aapka bank me khata hai?</i><br><br><i>T: Meeku bank lo katha vunda ?</i>                                 | <input type="checkbox"/> Yes <input type="checkbox"/> DNA<br><input type="checkbox"/> No <input type="checkbox"/> DKCS                                                                                                                                                                                                                                      |                                                                                              |
| <b>O</b> | How long ago did you open a bank account?<br><br><i>T: Meeru bank account eppudu open chesaru</i>                                                      | <input type="checkbox"/> <1 year <input type="checkbox"/> >5 years<br><input type="checkbox"/> 1 - 2 years <input type="checkbox"/> DNA<br><input type="checkbox"/> 2 - 5 years <input type="checkbox"/> DKCS<br><input type="checkbox"/> NA                                                                                                                |                                                                                              |
| <b>O</b> | What made you open a <b>bank account</b> ?<br><br><i>H: Bank khata kyon khulwaya aapne?</i><br><br><i>T: Bank lo katha yenduku tesukunaru ?</i>        | <input type="checkbox"/> For compensation<br><input type="checkbox"/> For work<br><input type="checkbox"/> For savings<br><input type="checkbox"/> For receiving govt. benefits<br><input type="checkbox"/> Zero Balance - PMJDY<br><input type="checkbox"/> Others                                                                                         | <input type="checkbox"/> DNA<br><input type="checkbox"/> DKCS<br><input type="checkbox"/> NA |
| <b>O</b> | How do you save?<br><br><i>H: Kya aap aane wale time ke liye kuch paise bacha paate ho?</i><br><br><i>T: Meeru ami iyna dabulu podupu chasukutara?</i> | <input type="checkbox"/> Bank <input type="checkbox"/> Postal<br><input type="checkbox"/> Local chits <input type="checkbox"/> Assets<br><input type="checkbox"/> Relatives/friends <input type="checkbox"/> DKCS<br><input type="checkbox"/> At home <input type="checkbox"/> DNA<br><input type="checkbox"/> SHG's<br><input type="checkbox"/> No Savings |                                                                                              |

**MASTER SHEET – CIRF PROJECT**

|                |                                                                                                                                                                                                                                                           |                                                                                                                                                                                                                                                                                                       |                                                                                                                                                               |
|----------------|-----------------------------------------------------------------------------------------------------------------------------------------------------------------------------------------------------------------------------------------------------------|-------------------------------------------------------------------------------------------------------------------------------------------------------------------------------------------------------------------------------------------------------------------------------------------------------|---------------------------------------------------------------------------------------------------------------------------------------------------------------|
| <b>O</b>       | Do you save regularly?<br><i>T: meeru prathi nela dachukuntara</i>                                                                                                                                                                                        | <input type="checkbox"/> Yes<br><input type="checkbox"/> No<br><input type="checkbox"/> No Savings                                                                                                                                                                                                    | <input type="checkbox"/> DNA<br><input type="checkbox"/> DKCS<br><input type="checkbox"/> NA                                                                  |
| <b>O</b>       | What would you save money for?<br>(even if no savings)<br><br><i>T: meeru nduku dachukovali anukuntaru</i>                                                                                                                                                | <input type="checkbox"/> Education<br><input type="checkbox"/> Heath<br><input type="checkbox"/> House<br><input type="checkbox"/> Kids Marriage<br><input type="checkbox"/> Livelihood/ work<br><input type="checkbox"/> House<br><input type="checkbox"/> Future<br><input type="checkbox"/> Others |                                                                                                                                                               |
| <b>4<br/>2</b> | Is there a difference in your saving pattern after relocation (or in-situ)?<br><br><i>T: meeru illu marina tarwata mee podupu lo emaina marpulu ochai ah</i>                                                                                              | <input type="checkbox"/> Yes - Increased<br><input type="checkbox"/> Yes - Reduced<br><input type="checkbox"/> No change                                                                                                                                                                              | <input type="checkbox"/> DNA<br><input type="checkbox"/> DKCS<br><input type="checkbox"/> NA                                                                  |
| <b>O</b>       | Is there a <b>difference in your saving</b> pattern after phailin / Hud Hud?<br><br><i>H: Hud Hud tufaan ke baad aapke bachat karne ke tarike mein koi parivartan aaya hai?</i><br><br><i>T: Hud Hud taravatha mee podupu lo yemi iyna marpu vachinda</i> | <input type="checkbox"/> Yes - Increased<br><input type="checkbox"/> Yes - Reduced<br><input type="checkbox"/> No change                                                                                                                                                                              | <input type="checkbox"/> DNA<br><input type="checkbox"/> DKCS<br><input type="checkbox"/> NA                                                                  |
| <b>O</b>       | Do members in your <b>family</b> have <b>insurance</b> ?<br><br><i>H: Aapke parvar walon ka bima hain?</i><br><i>T: Mee intilo valaki bhima vunda ?</i>                                                                                                   | <input type="checkbox"/> Yes<br><input type="checkbox"/> No<br><input type="checkbox"/> DNA<br><input type="checkbox"/> DKCS                                                                                                                                                                          | What kind?<br><input type="checkbox"/> Life insurance- LIC<br><input type="checkbox"/> Life Insurance - PMBY<br><input type="checkbox"/> Non life insurance   |
| <b>O</b>       | When did you get insurance?<br><br><i>T: Meeru eppufu insurance eppudu cheyincharu</i>                                                                                                                                                                    | <input type="checkbox"/> After hud hud<br><input type="checkbox"/> After relocation<br><input type="checkbox"/> Before relocation<br><input type="checkbox"/> NA                                                                                                                                      | <input type="checkbox"/> Before Phailin<br><input type="checkbox"/> when offered by an agent<br><input type="checkbox"/> DKCS<br><input type="checkbox"/> DNA |



MIGRATION – (EVERYONE)

|                 |                                                                                                                                                                                                                                                                                            |                                                                                                                                                                                                                                  |                                                                                                                                                                    |
|-----------------|--------------------------------------------------------------------------------------------------------------------------------------------------------------------------------------------------------------------------------------------------------------------------------------------|----------------------------------------------------------------------------------------------------------------------------------------------------------------------------------------------------------------------------------|--------------------------------------------------------------------------------------------------------------------------------------------------------------------|
| <p><b>O</b></p> | <p>Do you migrate for work?</p> <p><i>H: Kaam ke liye aap kisi aur jagh ja kar rahte ho kya?</i></p> <p><i>T: Pani ki patnaniki potuvuntara?</i></p>                                                                                                                                       | <p><input type="checkbox"/> Yes</p> <p><input type="checkbox"/> No</p> <p><input type="checkbox"/> DKCS</p> <p><input type="checkbox"/> DNA</p> <p><input type="checkbox"/> NA</p>                                               |                                                                                                                                                                    |
| <p><b>O</b></p> | <p><b>If you get a chance to shift to another city/ town/ place would you move? if yes, why?</b></p> <p><i>H: Agar aap ko koi dusray sher jaanay ho tho app konsay sher jaogay</i></p> <p><i>T: Meeku inko adiyina vuru vellipovali anay paristithi vastay meeru aa vuru velitaru?</i></p> | <p><input type="checkbox"/> No</p> <p><input type="checkbox"/> Not by choice</p> <p><input type="checkbox"/> Don't mind, but cannot</p> <p><input type="checkbox"/> Yes</p> <p><input type="checkbox"/> Yes, if there's work</p> | <p><input type="checkbox"/> Already migrate</p> <p><input type="checkbox"/> Move back</p> <p><input type="checkbox"/> DNA</p> <p><input type="checkbox"/> DKCS</p> |

|                 |                                                                                                                                                                                                                                                                                                                  |                                                                                                                                                                                                 |
|-----------------|------------------------------------------------------------------------------------------------------------------------------------------------------------------------------------------------------------------------------------------------------------------------------------------------------------------|-------------------------------------------------------------------------------------------------------------------------------------------------------------------------------------------------|
| <p><b>O</b></p> | <p>What kind of work do you do when you migrate?</p> <p><i>H: Kya kaam karte ho dusre sahar ja kar?</i></p> <p><i>T: MEERU inko vurilo yelanti pani chastuvuntaru ?</i></p>                                                                                                                                      |                                                                                                                                                                                                 |
| <p><b>O</b></p> | <p>Since when have you been migrating?</p> <p><i>H: Kitna samay ho gaya dusre sahar jaate hue?</i></p> <p><i>T: Yepudu nunchi ela inko vurilo pani ki veladam modalu petaru ?</i></p>                                                                                                                            | <p><input type="checkbox"/> After Cyclone</p> <p><input type="checkbox"/> Before Cyclone</p> <p><input type="checkbox"/> After relocation</p> <p><input type="checkbox"/> Before relocation</p> |
| <p><b>O</b></p> | <p>How much do you spend on travel to migrate?</p> <p><i>H: Aane jaane mein kitna kharcha hota h jab dusre sahar jaate ho?</i></p> <p><i>T: Velli ravadaniki yentha karchu peduuvuntaru ?</i></p>                                                                                                                |                                                                                                                                                                                                 |
| <p><b>O</b></p> | <p>How much do you earn per day?</p> <p><i>H: Ek din mein kitna kama lete ho?</i></p> <p><i>T: Oka roju lo yenha sampadincha galaru ?</i></p>                                                                                                                                                                    |                                                                                                                                                                                                 |
| <p><b>O</b></p> | <p>What <b>kind of problems</b> do you (<b>women</b>) face while your husband is away?</p> <p><i>H: Aapko kaisi pareshaniyan jhelni padti hai jab aapke pati bahar hote hai?</i></p> <p><i>T: Mee inti manishi (ayena)</i><br/><i>Paka vuriki pani ki vellinapudu meeku elanti kastalu yaduruavtuntaie ?</i></p> |                                                                                                                                                                                                 |

# MASTER SHEET – CIRF PROJECT

## SEASONAL CALENDAR OF LIVELIHOODS

**Q. In a year when do you do (kind of work - fishing/ farming/ migrate/ others)?**

| MONTH                 | JANUARY | FEBRUARY | MARCH | APRIL | MAY | JUNE |
|-----------------------|---------|----------|-------|-------|-----|------|
| INCOME<br>ACTIVITY    |         |          |       |       |     |      |
| ANY OTHER<br>RESPONSE |         |          |       |       |     |      |

| MONTH                 | JULY | AUGUST | SEPTEMBER | OCTOBER | NOVEMBER | DECEMBER |
|-----------------------|------|--------|-----------|---------|----------|----------|
| INCOME<br>ACTIVITY    |      |        |           |         |          |          |
| ANY OTHER<br>RESPONSE |      |        |           |         |          |          |



**DAILY ACTIVITY CHART**

| Plan your day (when do start work, where do you go for work, distance travelled, activity done during work, etc. )<br>Plan the respondents day according to the time sheet | Men | Women | Kids |
|----------------------------------------------------------------------------------------------------------------------------------------------------------------------------|-----|-------|------|
| 02:00 AM -04:00AM                                                                                                                                                          |     |       |      |
| 04:00 AM -06:00AM                                                                                                                                                          |     |       |      |
| 06:00 AM -08:00AM                                                                                                                                                          |     |       |      |
| 08:00 AM -10:00AM                                                                                                                                                          |     |       |      |
| 10:00 AM -12:00PM                                                                                                                                                          |     |       |      |
| 12:00 PM -02:00PM                                                                                                                                                          |     |       |      |
| 02:00 PM -04:00PM                                                                                                                                                          |     |       |      |

## MASTER SHEET – CIRF PROJECT

|                   |  |  |  |
|-------------------|--|--|--|
|                   |  |  |  |
| 04:00 PM -06:00PM |  |  |  |
| 06:00 PM -08:00PM |  |  |  |
| 08:00 PM -10:00PM |  |  |  |
| 10:00 PM -12:00AM |  |  |  |
| 12:00 AM -02:00AM |  |  |  |

Capture additional information here

AGRICULTURE – LIVELIHOOD

|                |                                                                                                                                                                                                                                               |                                                                                                                                                                                                                                                                                                                         |                                                                                              |
|----------------|-----------------------------------------------------------------------------------------------------------------------------------------------------------------------------------------------------------------------------------------------|-------------------------------------------------------------------------------------------------------------------------------------------------------------------------------------------------------------------------------------------------------------------------------------------------------------------------|----------------------------------------------------------------------------------------------|
| <b>0</b>       | <b>Size of agriculture land?</b><br><i>H: Kheti-badi karne waali zameen kitni hai?</i><br><br><i>T: Mee yentha bhoomi lo vayasayam chasrunaru ?</i>                                                                                           |                                                                                                                                                                                                                                                                                                                         |                                                                                              |
| <b>0</b>       | <b>Do you own the land?</b>                                                                                                                                                                                                                   | <input type="checkbox"/> No<br><input type="checkbox"/> Yes - Self<br><input type="checkbox"/> Yes - Jointly<br><input type="checkbox"/> NA                                                                                                                                                                             |                                                                                              |
| <b>0</b>       | <b>How far is that land</b> from where you stay?<br><i>H: Vo zameen kitni durr thi aapke ghar se?</i><br><br><i>T: Meru yavasayam chasay polam yentha dooram mee intiki ?</i>                                                                 | <input type="checkbox"/> < 1 km<br><input type="checkbox"/> 1 - 5 km<br><input type="checkbox"/> > 5 km                                                                                                                                                                                                                 | <input type="checkbox"/> DKCS<br><input type="checkbox"/> NA                                 |
| <b>4<br/>3</b> | <b>How far is that land</b> before relocation?<br><i>H: Ab jagh badlne ke baad kitni durr hain vo zameen?</i><br><br><i>T: Mee kota initiki nunchi yentha dooram ?</i>                                                                        | <input type="checkbox"/> No Change<br><input type="checkbox"/> Increased<br><input type="checkbox"/> Reduced<br><input type="checkbox"/> NA                                                                                                                                                                             |                                                                                              |
| <b>0</b>       | <b>What do you cultivate?</b>                                                                                                                                                                                                                 |                                                                                                                                                                                                                                                                                                                         |                                                                                              |
| <b>0</b>       | <b>Do you practice multi crop farming</b>                                                                                                                                                                                                     | <input type="checkbox"/> Yes <input type="checkbox"/> DNA<br><input type="checkbox"/> DKCS<br><input type="checkbox"/> No <input type="checkbox"/> NA                                                                                                                                                                   |                                                                                              |
| <b>4<br/>3</b> | <b>Do you face problems in operating</b> from the new <b>relocated site?</b><br><i>H: Yahan dusri jgh aane ke baad kaam ke liye aane jaane mein koi pareshaani hoti hai?</i><br><br><i>T: Mee kotha inti nunchi mee polam yentha dooram ?</i> | <input type="checkbox"/> Yes <input type="checkbox"/> DNA<br><input type="checkbox"/> DKCS<br><input type="checkbox"/> No <input type="checkbox"/> NA                                                                                                                                                                   |                                                                                              |
| <b>0</b>       | <b>What would you like your children to work as?</b><br><i>H: Aap kya chahte ho ki aapke bachche kya kaam kare?</i><br><br><i>T: Mee me pillalu ni yemi chastu chudalianukuntunaru ?</i>                                                      | <input type="checkbox"/> Continue our profession but better<br><input type="checkbox"/> Not in our control<br><input type="checkbox"/> Educate and get jobs<br><input type="checkbox"/> Work in Industries<br><input type="checkbox"/> Work as a police / govt. job<br><input type="checkbox"/> Others (marriage, etc.) | <input type="checkbox"/> DKCS<br><input type="checkbox"/> DNA<br><input type="checkbox"/> NA |

HORTICULTURE – LIVELIHOOD

|                      |                                                                                                                                                                                                                                    |                                                                                                                                                                                                                                                                                                                                                                                                                         |                                                                                              |
|----------------------|------------------------------------------------------------------------------------------------------------------------------------------------------------------------------------------------------------------------------------|-------------------------------------------------------------------------------------------------------------------------------------------------------------------------------------------------------------------------------------------------------------------------------------------------------------------------------------------------------------------------------------------------------------------------|----------------------------------------------------------------------------------------------|
| <b>O</b>             | <b>Size of horticulture land</b><br><i>H: Kheti-badi karne waali zameen kitni hai?</i><br><i>T: Mee yentha bhoomi lo vayasayam chasrunaru ?</i>                                                                                    |                                                                                                                                                                                                                                                                                                                                                                                                                         |                                                                                              |
| <b>O</b>             | <b>Do you own the land?</b>                                                                                                                                                                                                        | <input type="checkbox"/> No<br><input type="checkbox"/> Yes - Self<br><input type="checkbox"/> Yes - Jointly                                                                                                                                                                                                                                                                                                            | <input type="checkbox"/> DKCS<br><input type="checkbox"/> DNA<br><input type="checkbox"/> NA |
| <b>O</b>             | <b>How far is that land</b> from where you stay?<br><i>H: Vo zameen kitni durr thi aapke ghar se?</i><br><i>T: Meru yavasayam chasay polam yentha dooram mee intiki ?</i>                                                          | <input type="checkbox"/> < 1 km<br><input type="checkbox"/> 1 - 5 km<br><input type="checkbox"/> > 5 km                                                                                                                                                                                                                                                                                                                 | <input type="checkbox"/> DKCS<br><input type="checkbox"/> DNA<br><input type="checkbox"/> NA |
| <b>4</b><br><b>3</b> | <b>How far is that land</b> before relocation?<br><i>H: Ab jagh badlne ke baad kitni durr hain vo zameen?</i><br><i>T: Mee kota initiki nunchi yentha dooram ?</i>                                                                 | <input type="checkbox"/> No Change<br><input type="checkbox"/> Increased<br><input type="checkbox"/> Reduced                                                                                                                                                                                                                                                                                                            | <input type="checkbox"/> DKCS<br><input type="checkbox"/> DNA<br><input type="checkbox"/> NA |
| <b>O</b>             | <b>What do you cultivate?</b>                                                                                                                                                                                                      |                                                                                                                                                                                                                                                                                                                                                                                                                         |                                                                                              |
| <b>O</b>             | <b>Do you practice multi crop farming</b>                                                                                                                                                                                          | <input type="checkbox"/> Yes<br><input type="checkbox"/> No                                                                                                                                                                                                                                                                                                                                                             | <input type="checkbox"/> DNA<br><input type="checkbox"/> DKCS<br><input type="checkbox"/> NA |
| <b>4</b><br><b>3</b> | <b>Do you face problems in operating</b> from the new relocated site?<br><i>H: Yahan dusri jgh aane ke baad kaam ke liye aane jaane mein koi pareshaani hoti hai?</i><br><i>T: Mee kotha inti nunchi mee polam yentha dooram ?</i> | <input type="checkbox"/> Yes<br><input type="checkbox"/> No                                                                                                                                                                                                                                                                                                                                                             | <input type="checkbox"/> DNA<br><input type="checkbox"/> DKCS<br><input type="checkbox"/> NA |
| <b>O</b>             | <b>What would you like your children to work as?</b><br><i>H: Aap kya chahte ho ki aapke bachche kya kaam kare?</i><br><i>T: Mee me pillalu ni yemi chastu chudalianukuntunaru ?</i>                                               | <input type="checkbox"/> Continue our profession but better<br><input type="checkbox"/> Not in our control<br><input type="checkbox"/> Educate and get jobs<br><input type="checkbox"/> Work in Industries<br><input type="checkbox"/> Work as a police / govt. job<br><input type="checkbox"/> Others (marriage, etc.)<br><input type="checkbox"/> DKCS<br><input type="checkbox"/> DNA<br><input type="checkbox"/> NA |                                                                                              |

FISHING – LIVELIHOOD

|                |                                                                                                                                                                                                                                                 |                                                                                                                                                                                                                                    |  |
|----------------|-------------------------------------------------------------------------------------------------------------------------------------------------------------------------------------------------------------------------------------------------|------------------------------------------------------------------------------------------------------------------------------------------------------------------------------------------------------------------------------------|--|
| <b>0</b>       | <b>Do you own any assets for fishing</b>                                                                                                                                                                                                        | <input type="checkbox"/> Yes<br><input type="checkbox"/> Fishing Nets<br><input type="checkbox"/> Others                                                                                                                           |  |
| <b>0</b>       | <b>Where do store your fishing assets?</b>                                                                                                                                                                                                      | <input type="checkbox"/> At home<br><input type="checkbox"/> On the shore<br><input type="checkbox"/> Others<br><input type="checkbox"/> NA                                                                                        |  |
| <b>0</b>       | Where do you <b>sell your catch</b> ?<br><i>H: Aap machali kahan bechte ho?</i><br><i>T: Meeru patina chapalu yekada amutaru ?</i>                                                                                                              | <input type="checkbox"/> Same neighbourhood<br><input type="checkbox"/> Other location<br><input type="checkbox"/> NA                                                                                                              |  |
| <b>4<br/>3</b> | (Do you / would you) face <b>challenges</b> for fishing in the new site relocation?<br><i>H: Dusri jagh jaa kar machli pakdne me koi pareshaani hoti hai kya?</i><br><i>T: Inko jagha velli chapalu patali antay ami iyna kastalu vuntaya ?</i> | <div> <input type="checkbox"/> Yes           <input type="checkbox"/> DNA         </div> <div> <input type="checkbox"/> No           <input type="checkbox"/> DKCS         </div> <div> <input type="checkbox"/> NA         </div> |  |
| <b>4<br/>3</b> | If yes, then what?<br><i>H: Agar haan, kya pareshani hoti hai?</i><br><i>T: Elanti kastalu vuntaye ?</i>                                                                                                                                        |                                                                                                                                                                                                                                    |  |



OTHER – LIVELIHOODS

| Questions for daily wage labour |                                                                                                                                                                                                                            |                                                                                                                                                                                                                                                   |                                                                   |
|---------------------------------|----------------------------------------------------------------------------------------------------------------------------------------------------------------------------------------------------------------------------|---------------------------------------------------------------------------------------------------------------------------------------------------------------------------------------------------------------------------------------------------|-------------------------------------------------------------------|
| 0                               | <p>Do you work for a wage, salary or any payment in kind? Why?</p> <p><i>H: Aap majduri karte ho ya mahine ke vetan par kaam karte ho? aur kyon?</i></p> <p><i>T: meeru chesina paniki dabbulu ela vastai?</i></p>         | <input type="checkbox"/> Daily wage/<br>casual labour<br><br><input type="checkbox"/> Contract Labour<br><br><input type="checkbox"/> Regular wage /<br>salaried<br><br><input type="checkbox"/> Self employed<br><br><input type="checkbox"/> NA |                                                                   |
| 0                               | <p>Who do you work with?</p> <p><i>H: Aap kiske saath kaam karte ho?</i></p> <p><i>T: meeru evaritho pani chestaru?</i></p>                                                                                                | <input type="checkbox"/> Private Company/<br>Contractor<br><br><input type="checkbox"/> Government<br><br><input type="checkbox"/> Self<br><br><input type="checkbox"/> Others<br><br><input type="checkbox"/> NA                                 |                                                                   |
| 0                               | <p>Are there <b>any groups and unions</b>, which help you to find work?</p> <p><i>H: Koi sanstha ya log aapki madat karte hai kaam dhoodne mein?</i></p> <p><i>T: emaina groups and unions meeku sahayam chestara?</i></p> | <input type="checkbox"/> Yes<br><br><input type="checkbox"/> No<br><br><input type="checkbox"/> NA                                                                                                                                                | <input type="checkbox"/> DNA<br><br><input type="checkbox"/> DKCS |
| 0                               | <p>How far is your workplace?</p> <p><i>H: Ghar se kaam karne waali jagh kitni dur hai?</i></p> <p><i>T: mee pani chesi chotuki me intiki enta duram?</i></p>                                                              |                                                                                                                                                                                                                                                   |                                                                   |
| 4<br>3                          | <p>How far was your workplace before relocation?</p> <p><i>T: mee pani chesi chotu me patha inti nunchi enta duram undedi?</i></p>                                                                                         |                                                                                                                                                                                                                                                   |                                                                   |

| If household level collective work |                                                                                                                                                                                                                                          |                                                                                                                                                                                 |
|------------------------------------|------------------------------------------------------------------------------------------------------------------------------------------------------------------------------------------------------------------------------------------|---------------------------------------------------------------------------------------------------------------------------------------------------------------------------------|
| 0                                  | <p>Do you work within the family or also with people from outside?</p> <p><i>H: Kya aap ek parivar mein kaam karte ho ya fir aur logo ke saath mil kar kaam karte ho?</i></p> <p><i>T: meeru me intlo valla sahayam tesukuntara?</i></p> | <input type="checkbox"/> Yes within family<br><br><input type="checkbox"/> No with people from outside<br><br><input type="checkbox"/> DNA<br><br><input type="checkbox"/> DKCS |
| 0                                  | <p>If yes, how do you split costs?</p> <p><i>H : Agar aap aur logo ke saath mil kar kaam karte ho to paise kaise baat-te ho?</i></p> <p><i>T: mari dabbulu ela panchukuntaru?</i></p>                                                    |                                                                                                                                                                                 |

| For Salaried |                                                                                                                                                                                                                                                            |                                                                                                                                                                                 |                                                                                              |
|--------------|------------------------------------------------------------------------------------------------------------------------------------------------------------------------------------------------------------------------------------------------------------|---------------------------------------------------------------------------------------------------------------------------------------------------------------------------------|----------------------------------------------------------------------------------------------|
| <b>O</b>     | <p>Was your employment a <b>written agreement</b>?</p> <p><i>H: Kya aapka rojgar, paper par likhit hai?</i></p> <p><i>T: mee udyoganiki emaina hameelu rata purvam lo unnai ah?</i></p>                                                                    | <input type="checkbox"/> Yes <input type="checkbox"/> DNA<br><input type="checkbox"/> No <input type="checkbox"/> DKCS<br><input type="checkbox"/> NA                           |                                                                                              |
| <b>O</b>     | <p>Are you <b>entitled</b> to any paid <b>leave</b> from your employer?</p> <p><i>H: Kya aapko chuuti lene par bhi rojgar ka bhuktan diya jata hai?</i></p> <p><i>T: meeku selavu emaina ostunda?</i></p>                                                  | <input type="checkbox"/> Yes <input type="checkbox"/> DNA<br><input type="checkbox"/> No <input type="checkbox"/> DKCS<br><input type="checkbox"/> NA                           |                                                                                              |
| <b>O</b>     | <p>Can your <b>employer remove</b> you <b>from work</b> without giving prior notice?</p> <p><i>H: Kya aapka maalik aapko bina bataye naukri se nikal sakta hai?</i></p> <p><i>T: me udyoga dari meeku mundu cheppakunda pani lonchi teseya galara?</i></p> | <input type="checkbox"/> Yes <input type="checkbox"/> DNA<br><input type="checkbox"/> No <input type="checkbox"/> DKCS<br><input type="checkbox"/> NA                           |                                                                                              |
| <b>O</b>     | <p>What other employment <b>benefits do you avail</b>?</p> <p><i>H: Kya aapko rojgar ke alawa aur koi laabh diya jata hain?</i></p> <p><i>T: meeru intaku minchi emaina udyoga labhalu pondutunara?</i></p>                                                | <input type="checkbox"/> Bonus<br><input type="checkbox"/> Pension fund<br><input type="checkbox"/> Health<br><input type="checkbox"/> Others _____<br><input type="checkbox"/> | <input type="checkbox"/> DNA<br><input type="checkbox"/> NA<br><input type="checkbox"/> DKCS |

| For those who are unemployed/ under employed in the HH |                                                                                                                                                |                                                             |  |
|--------------------------------------------------------|------------------------------------------------------------------------------------------------------------------------------------------------|-------------------------------------------------------------|--|
| <b>O</b>                                               | <p>Do they (you) <b>want to work</b>?</p> <p><i>H: Kya vo kaam karna chahte hai?</i></p> <p><i>T: vallu pani cheyali ani anukuntunara?</i></p> | <input type="checkbox"/> Yes<br><input type="checkbox"/> No |  |
| <b>O</b>                                               | <p>If yes, why are they not working?</p> <p><i>H: Vo kaam kyon nahi kar rahe hai?</i></p> <p><i>T: vallu nduku pani cheyatle?</i></p>          |                                                             |  |

|                                                             |                                                                                                                                                                                                                                                                                                                         |                                                               |
|-------------------------------------------------------------|-------------------------------------------------------------------------------------------------------------------------------------------------------------------------------------------------------------------------------------------------------------------------------------------------------------------------|---------------------------------------------------------------|
| <p><b>What would you like your children to work as?</b></p> | <input type="checkbox"/> Continue our profession but better<br><input type="checkbox"/> Not in our control<br><input type="checkbox"/> Educate and get jobs<br><input type="checkbox"/> Work in Industries<br><input type="checkbox"/> Work as a police / govt. job<br><input type="checkbox"/> Others (marriage, etc.) | <input type="checkbox"/> DNA<br><input type="checkbox"/> DKCS |
|-------------------------------------------------------------|-------------------------------------------------------------------------------------------------------------------------------------------------------------------------------------------------------------------------------------------------------------------------------------------------------------------------|---------------------------------------------------------------|

HOUSING

| BAU                        |                                                                                                                                                                        |                                                                                                                                                                  |                                                                                                                                                                                                                                                              |
|----------------------------|------------------------------------------------------------------------------------------------------------------------------------------------------------------------|------------------------------------------------------------------------------------------------------------------------------------------------------------------|--------------------------------------------------------------------------------------------------------------------------------------------------------------------------------------------------------------------------------------------------------------|
| 0                          | <p>Do you <b>have patta/certificate</b> for this house?</p> <p><i>H : Kya aapke paas patta hai iss ghar ka?</i></p> <p><i>T: mee intiki patta unda?</i></p>            | <input type="checkbox"/> Yes<br><input type="checkbox"/> No<br><input type="checkbox"/> DNA<br><input type="checkbox"/> DKCS<br><input type="checkbox"/> NA      | <p>If yes what kind of patta</p> <input type="checkbox"/> Freehold<br><input type="checkbox"/> Occupation certificate<br><input type="checkbox"/> Non alieanable<br><input type="checkbox"/> Rent<br><input type="checkbox"/> Occupation without certificate |
| 0                          | <p>Who gave you the patta / how did you get the certificate?</p> <p><i>T: meeku e patta evaru icharu?</i></p>                                                          | <input type="checkbox"/> Inherited<br><input type="checkbox"/> Govt<br><input type="checkbox"/> Govt ( to my owner)<br><input type="checkbox"/> Relative/ family | <input type="checkbox"/> Govt. (which agency)<br><input type="checkbox"/> Private<br><input type="checkbox"/> Gave money to someone else and got.<br><input type="checkbox"/> DKCS<br><input type="checkbox"/> DNA                                           |
| 0                          | <p>Whose <b>name is the house</b> in?</p> <p><i>H : Ye ghar kiske naam par hai?</i></p> <p><i>T: mee inti patta evari peruna undi?</i></p>                             | <input type="checkbox"/> Male<br><input type="checkbox"/> Male (relative)<br><input type="checkbox"/> Female<br><input type="checkbox"/> Female (relative)       | <input type="checkbox"/> Male and Female<br><input type="checkbox"/> DKCS<br><input type="checkbox"/> NA                                                                                                                                                     |
| Before relocation/ In-situ |                                                                                                                                                                        |                                                                                                                                                                  |                                                                                                                                                                                                                                                              |
| 4<br>2<br>3                | <p>Did you <b>have patta/</b> certificate for your previous house?</p> <p><i>H : Kya aapke paas patta hai iss ghar ka?</i></p> <p><i>T: mee intiki patta unda?</i></p> | <input type="checkbox"/> Yes<br><input type="checkbox"/> No<br><input type="checkbox"/> DNA<br><input type="checkbox"/> DKCS<br><input type="checkbox"/> NA      | <p>If yes what kind of patta</p> <input type="checkbox"/> Freehold<br><input type="checkbox"/> Occupation certificate<br><input type="checkbox"/> Non alieanable<br><input type="checkbox"/> Rent<br><input type="checkbox"/> Occupation without certificate |
| 4<br>2<br>3                | <p>Who gave you the patta / how did you get the certificate?</p> <p><i>T: meeku e patta evaru icharu?</i></p>                                                          | <input type="checkbox"/> Inherited<br><input type="checkbox"/> Govt<br><input type="checkbox"/> Govt ( to my owner)<br><input type="checkbox"/> Relative/ family | <input type="checkbox"/> Govt. (which agency)<br><input type="checkbox"/> Private<br><input type="checkbox"/> Gave money to someone else and got.<br><input type="checkbox"/> DKCS<br><input type="checkbox"/> DNA                                           |
| 4<br>2<br>3                | <p>Whose name was your <b>previous house</b> in ?</p> <p><i>H : Ye ghar kiske naam par hai?</i></p> <p><i>T: mee inti patta evari peruna undi?</i></p>                 | <input type="checkbox"/> Male<br><input type="checkbox"/> Female<br><input type="checkbox"/> Both<br><input type="checkbox"/> NA                                 |                                                                                                                                                                                                                                                              |

**MASTER SHEET – CIRF PROJECT**

|                      |                                                                                                                                                                                                                                                                                                                                                                                                                                              |                                                                                                                                                                                                                                                                                                                                                        |                                                                                                    |
|----------------------|----------------------------------------------------------------------------------------------------------------------------------------------------------------------------------------------------------------------------------------------------------------------------------------------------------------------------------------------------------------------------------------------------------------------------------------------|--------------------------------------------------------------------------------------------------------------------------------------------------------------------------------------------------------------------------------------------------------------------------------------------------------------------------------------------------------|----------------------------------------------------------------------------------------------------|
| <b>0</b>             | Did you get IAY housing before?                                                                                                                                                                                                                                                                                                                                                                                                              | <input type="checkbox"/> Yes <input type="checkbox"/> DNA<br><input type="checkbox"/> No <input type="checkbox"/> DKCS<br><input type="checkbox"/> NA                                                                                                                                                                                                  | Reasons for IAY Inclusion or exclusion                                                             |
| <b>4<br/>2</b>       | Is the space in the new house sufficient compare to your original house                                                                                                                                                                                                                                                                                                                                                                      | <input type="checkbox"/> Yes <input type="checkbox"/> DNA<br><input type="checkbox"/> No <input type="checkbox"/> DKCS<br><input type="checkbox"/> NA                                                                                                                                                                                                  |                                                                                                    |
| <b>4<br/>2<br/>3</b> | How is the <b>old house</b> being <b>used</b> ?<br><br><i>H : Purana makaan kaise istemal kiya ja aha hai?</i><br><br><i>T: meeru patha illu ela vadukuntunaru ?</i>                                                                                                                                                                                                                                                                         | <input type="checkbox"/> Vacant <input type="checkbox"/> Rent<br><input type="checkbox"/> Othe family <input type="checkbox"/> NA<br><input type="checkbox"/> Self <input type="checkbox"/> DKCS<br><input type="checkbox"/> Demolished/Evicted                                                                                                        |                                                                                                    |
| <b>4<br/>2<br/>3</b> | Did you make extensions in allocated house?<br><br><i>H: Kya aapne makan mein koi badlav kiya?</i><br><br><i>T: meeru me intiki emaina marpulu chesara?</i>                                                                                                                                                                                                                                                                                  | <input type="checkbox"/> Yes<br><input type="checkbox"/> No<br><input type="checkbox"/> DNA<br><input type="checkbox"/> DKCS<br><input type="checkbox"/> NA                                                                                                                                                                                            | Reasons for extension<br><i>H: kya kaaran tha badlav ka/ T: marpulu cheyadaniki karanam enti ?</i> |
| <b>3</b>             | Why are you not moving to the new house?<br><i>H : Agar nahi, toh aap naye ghar me kyon nahi ja rahe ho?</i><br><i>T: meeru kotha intiki nduku vellodhu ani anukuntunaru?</i>                                                                                                                                                                                                                                                                |                                                                                                                                                                                                                                                                                                                                                        |                                                                                                    |
| <b>4<br/>2<br/>3</b> | Size of the original house?                                                                                                                                                                                                                                                                                                                                                                                                                  |                                                                                                                                                                                                                                                                                                                                                        |                                                                                                    |
|                      | Do you recieve any govt. programs that provide assistance you are eligible for?<br><br>e.g. Voter Card, etc. <ul style="list-style-type: none"> <li><input type="radio"/> Biju gram jyoti yojana (rural electrification )</li> <li><input type="radio"/> Biju Atma Nijukti Yojana (Self – employment loans)</li> <li><input type="radio"/> Nirman shramik pucca ghar yojana ( provides shelter to construction workers / pension)</li> </ul> | <input type="checkbox"/> Voter Id<br><input type="checkbox"/> Aadhar card<br><input type="checkbox"/> BPL card<br><input type="checkbox"/> APL card<br><input type="checkbox"/> Pension (Madhu babu pension yo<br><input type="checkbox"/> Maternity benefits (Mamata Yoja<br><input type="checkbox"/> Widow pension<br><input type="checkbox"/> Other |                                                                                                    |

| HOUSING - ONLY FOR ODISHA                                                                                                                                                                                                                                                                        |                                                                                                                                                                                                                                                   |  |
|--------------------------------------------------------------------------------------------------------------------------------------------------------------------------------------------------------------------------------------------------------------------------------------------------|---------------------------------------------------------------------------------------------------------------------------------------------------------------------------------------------------------------------------------------------------|--|
| <p><b>4</b><br/><b>2</b><br/><b>3</b></p> <p>Did you spend extra money (other than that given by the program) on construction?<br/> <i>H: Kya aapne alag se kharcha kiya ghar ko banane ke liye?</i><br/> <i>T: meeru illu kattadaniki emaina ekkuva karchu chesara ?</i></p>                    | <p><input type="checkbox"/> Yes<br/> <input type="checkbox"/> No<br/> <input type="checkbox"/> DNA<br/> <input type="checkbox"/> DKCS<br/> <input type="checkbox"/> NA</p>                                                                        |  |
| <p><b>4</b><br/><b>2</b><br/><b>3</b></p> <p>Were you given training for construction of houses under the ODRP program?<br/> <i>H : ODRP yojna ke andar makaan banane ki shiksha aapko kahan di gait hi?</i><br/> <i>T: meeku ODRP kinda emaina pani nerpinchara (illu kattukovadaniki)?</i></p> | <p><input type="checkbox"/> Yes      <input type="checkbox"/> DNA<br/> <input type="checkbox"/> No      <input type="checkbox"/> DKCS<br/> <input type="checkbox"/> NA</p>                                                                        |  |
| <p><b>4</b><br/><b>2</b><br/><b>3</b></p> <p>If the above answer is no, then ask :<br/> Why (did you / didn't you ) participate?</p>                                                                                                                                                             |                                                                                                                                                                                                                                                   |  |
| <p><b>4</b><br/><b>2</b><br/><b>3</b></p> <p>Who constructed your new/ insitu unit (self/ contractor)?<br/> <i>H : Kisne banaya apka naya ghar?</i><br/> <i>T: me kotha illu evaru kattaru?</i></p>                                                                                              | <p><input type="checkbox"/> Self<br/> <input type="checkbox"/> Contractor - Individual<br/> <input type="checkbox"/> Contractor - Group<br/> <input type="checkbox"/> DNA<br/> <input type="checkbox"/> DKCS<br/> <input type="checkbox"/> NA</p> |  |

**WATER AND SANITATION**

|           |                                                                                                                                                                                                                                  |                                                                                                                                                                                                                                                                                     |                                                                                                         |
|-----------|----------------------------------------------------------------------------------------------------------------------------------------------------------------------------------------------------------------------------------|-------------------------------------------------------------------------------------------------------------------------------------------------------------------------------------------------------------------------------------------------------------------------------------|---------------------------------------------------------------------------------------------------------|
| <b>0</b>  | <p>What is the <b>source</b> of drinking water?</p> <p><i>H: Pine ke paani ka sadhan kya hai?</i></p> <p><i>T: meeku nellu ekkadi nundi ostai?</i></p>                                                                           | <input type="checkbox"/> Public Tap<br><input type="checkbox"/> Piped Water Connection<br><input type="checkbox"/> Hand pump<br><input type="checkbox"/> Water Tank<br><input type="checkbox"/> Water cans<br><input type="checkbox"/> Tube well<br><input type="checkbox"/> Others |                                                                                                         |
| <b>43</b> | <p>What was the <b>source</b> of drinking water <b>before relocation</b>?</p> <p><i>H: Yahan aane se pahle pine ke paani ka kya sadhan tha?</i></p> <p><i>T: meeru illu maraka mundu ekkadi nundi neelu techukune valli?</i></p> | <input type="checkbox"/> Public Tap<br><input type="checkbox"/> Piped Water Connection<br><input type="checkbox"/> Hand pump<br><input type="checkbox"/> Water Tank<br><input type="checkbox"/> Others<br><input type="checkbox"/> NA                                               |                                                                                                         |
| <b>0</b>  | <p>Is the water <b>treated</b>? (Yes/No)</p> <p><i>H: Kya paani saaf kiya jaata hai?</i></p> <p><i>T: meeru netini shubraparustara?</i></p>                                                                                      | <input type="checkbox"/> Yes<br><input type="checkbox"/> No<br><input type="checkbox"/> DNA<br><input type="checkbox"/> DKCS                                                                                                                                                        | <p>If yes, what purification methods do you use?</p> <p><i>T: meeru netini ela shubraparustaru?</i></p> |
| <b>0</b>  | <p>Do you <b>have a toilet</b> in your house?</p> <p><i>H: Kya aapke ghar mein shochalye hai?</i></p> <p><i>T: me intlo toilet unda?</i></p>                                                                                     | <input type="checkbox"/> Yes<br><input type="checkbox"/> No<br><input type="checkbox"/> DNA<br><input type="checkbox"/> NA                                                                                                                                                          |                                                                                                         |
| <b>42</b> | <p>Where did you <b>go before relocation</b></p> <p><i>H: Yahan aane se pahle kahan jaate the?</i></p> <p><i>T: medu ekkada velle varu?</i></p>                                                                                  | <input type="checkbox"/> Open defecation<br><input type="checkbox"/> Toilet<br><input type="checkbox"/> DKCS<br><input type="checkbox"/> DNA                                                                                                                                        |                                                                                                         |

**EXPENDITURE – FOR EVERYONE**

|           |                                                                       |                                                                                                              |                                                                                              |
|-----------|-----------------------------------------------------------------------|--------------------------------------------------------------------------------------------------------------|----------------------------------------------------------------------------------------------|
| <b>4</b>  | <p>Is there a change in your travel expenditure after relocation?</p> | <input type="checkbox"/> Increased<br><input type="checkbox"/> Reduced<br><input type="checkbox"/> No Change | <input type="checkbox"/> DKCS<br><input type="checkbox"/> DNA<br><input type="checkbox"/> NA |
| <b>42</b> | <p>Is there a change in your total expenditure after relocation?</p>  | <input type="checkbox"/> Increased<br><input type="checkbox"/> Reduced<br><input type="checkbox"/> No Change | <input type="checkbox"/> DKCS<br><input type="checkbox"/> DNA<br><input type="checkbox"/> NA |

ASSETS – FOR EVERYONE

|          |                                                                                                                                                       |                                                                                                                                                                                                                                                                                                                                                                                                                                                                                                                                                                                                                                        |
|----------|-------------------------------------------------------------------------------------------------------------------------------------------------------|----------------------------------------------------------------------------------------------------------------------------------------------------------------------------------------------------------------------------------------------------------------------------------------------------------------------------------------------------------------------------------------------------------------------------------------------------------------------------------------------------------------------------------------------------------------------------------------------------------------------------------------|
| <b>O</b> | <p>What <b>assets</b> do you <b>own</b>?</p> <p><i>H: Aapki apni kya sampati hai?</i></p> <p><i>T: mee intlo elanti vastuvulu / astulu unnai?</i></p> | <div style="display: flex; flex-direction: column; gap: 10px;"> <div><input type="checkbox"/> Furniture</div> <div><input type="checkbox"/> Gas stove</div> <div><input type="checkbox"/> Mobile</div> <div><input type="checkbox"/> Television</div> <div><input type="checkbox"/> Other electronic appliances ex: Fan/ mixer/ washing machine/ fridge etc</div> <div><input type="checkbox"/> Cycle</div> <div><input type="checkbox"/> 2- Wheeler</div> <div><input type="checkbox"/> 4- Wheeler</div> <div><input type="checkbox"/> Work related assets (productive)</div> <div><input type="checkbox"/> Others _____</div> </div> |
|----------|-------------------------------------------------------------------------------------------------------------------------------------------------------|----------------------------------------------------------------------------------------------------------------------------------------------------------------------------------------------------------------------------------------------------------------------------------------------------------------------------------------------------------------------------------------------------------------------------------------------------------------------------------------------------------------------------------------------------------------------------------------------------------------------------------------|

| LIVESTOCK |                                                                                                                                                                 |                                                                                                                                                                                                                                                                                                                                                                                                                                                 |                                                                                                                                                                                                |
|-----------|-----------------------------------------------------------------------------------------------------------------------------------------------------------------|-------------------------------------------------------------------------------------------------------------------------------------------------------------------------------------------------------------------------------------------------------------------------------------------------------------------------------------------------------------------------------------------------------------------------------------------------|------------------------------------------------------------------------------------------------------------------------------------------------------------------------------------------------|
| <b>O</b>  | <p>Do you own animals <b>now</b>?</p> <p><i>H: Kya ab jaanwar rakhte ho?</i></p> <p><i>T: eppudu avi unnai ah?</i></p>                                          | <div style="display: flex; flex-direction: column; gap: 10px;"> <div><input type="checkbox"/> Yes</div> <div><input type="checkbox"/> No</div> <div><input type="checkbox"/> NA</div> </div>                                                                                                                                                                                                                                                    | <div style="display: flex; flex-direction: column; gap: 10px;"> <div><input type="checkbox"/> DNA</div> <div><input type="checkbox"/> DKCS</div> </div>                                        |
| <b>4</b>  | <p>Did you <b>own animals</b> before relocation?</p> <p><i>H: Kya aap pahle jaanwar rakhte the?</i></p> <p><i>T: mee degra kodilu/mekalu emaina undeva?</i></p> | <div style="display: flex; flex-direction: column; gap: 10px;"> <div><input type="checkbox"/> Yes</div> <div><input type="checkbox"/> No</div> <div><input type="checkbox"/> NA</div> </div>                                                                                                                                                                                                                                                    | <div style="display: flex; flex-direction: column; gap: 10px;"> <div><input type="checkbox"/> DNA</div> <div><input type="checkbox"/> DKCS</div> </div>                                        |
| <b>4</b>  | <p>If lost from before, then how?</p> <p><i>H: Agar nahin, Aapne apne jaanwaro ko kaise kho diya?</i></p> <p><i>T: meeru vatini ela kogottu kunaru?</i></p>     | <div style="display: flex; flex-direction: column; gap: 10px;"> <div><input type="checkbox"/> Before event</div> <div><input type="checkbox"/> After event</div> <div><input type="checkbox"/> Before relocation</div> <div><input type="checkbox"/> After relocation</div> <div><input type="checkbox"/> Other shock</div> <div><input type="checkbox"/> Sold despite of relocation/ event</div> <div><input type="checkbox"/> NA</div> </div> |                                                                                                                                                                                                |
| <b>O</b>  | <p>Did you face loss in livestock after Hud Hud?</p>                                                                                                            | <div style="display: flex; flex-direction: column; gap: 10px;"> <div><input type="checkbox"/> Yes</div> <div><input type="checkbox"/> No</div> </div>                                                                                                                                                                                                                                                                                           | <div style="display: flex; flex-direction: column; gap: 10px;"> <div><input type="checkbox"/> DNA</div> <div><input type="checkbox"/> DKCS</div> <div><input type="checkbox"/> NA</div> </div> |

HEALTH – FOR EVERYONE

|                 |                                                                                                                                                                                                                                  |                                                                                                                                                                                                                                                                                                                                                                                                                                                                                                                                                                                                                                                                                                                                                                                                                                                                                                                                                                                                                                                                                                                     |
|-----------------|----------------------------------------------------------------------------------------------------------------------------------------------------------------------------------------------------------------------------------|---------------------------------------------------------------------------------------------------------------------------------------------------------------------------------------------------------------------------------------------------------------------------------------------------------------------------------------------------------------------------------------------------------------------------------------------------------------------------------------------------------------------------------------------------------------------------------------------------------------------------------------------------------------------------------------------------------------------------------------------------------------------------------------------------------------------------------------------------------------------------------------------------------------------------------------------------------------------------------------------------------------------------------------------------------------------------------------------------------------------|
| <p><b>O</b></p> | <p>Do you have a <b>health card</b>?<br/>If yes, then how did you get it?</p> <p><i>H: Aapko patr kaise mila?</i></p> <p><i>T: meeku aarogya card emaina unda?</i></p>                                                           | <div> <input type="checkbox"/> Yes             <input type="checkbox"/> DNA         </div> <div> <input type="checkbox"/> No             <input type="checkbox"/> DKCS         </div> <div> <input type="checkbox"/> NA         </div>                                                                                                                                                                                                                                                                                                                                                                                                                                                                                                                                                                                                                                                                                                                                                                                                                                                                              |
| <p><b>O</b></p> | <p>Did you have a <b>chance to use</b> the card ?</p>                                                                                                                                                                            | <div> <input type="checkbox"/> Yes             <input type="checkbox"/> DNA         </div> <div> <input type="checkbox"/> No             <input type="checkbox"/> DKCS         </div> <div> <input type="checkbox"/> NA         </div>                                                                                                                                                                                                                                                                                                                                                                                                                                                                                                                                                                                                                                                                                                                                                                                                                                                                              |
| <p><b>O</b></p> | <p>What <b>kind of health issues</b> that you frequently face?</p> <p><i>H: Swasth se sambandhi aksar kya pareshani jhelni padti hai?</i></p> <p><i>T: me intlo aarogyaniki sambandinchina samasyala gurinchi cheppandi?</i></p> | <div> <input type="checkbox"/> Water borne diseases             <input type="checkbox"/> Many of the above         </div> <div> <input type="checkbox"/> Vector borne diseases             <input type="checkbox"/> Lack of treatment facilities         </div> <div> <input type="checkbox"/> Water and Vector borne             <input type="checkbox"/> Veterinary problems         </div> <div> <input type="checkbox"/> Regular cold and fever             <input type="checkbox"/> Paralysis or physical handicap         </div> <div> <input type="checkbox"/> Body Pains and Arthristis             <input type="checkbox"/> Professional Hazards         </div> <div> <input type="checkbox"/> BP, Diabetes, Gastric, Asthma, Cancer, Cardiovascular problems             <input type="checkbox"/> Others         </div> <div> <input type="checkbox"/> OB/GYN problems             <input type="checkbox"/> NA         </div> <div> <input type="checkbox"/> Infections (skin, eye, ear, etc.)             <input type="checkbox"/> DNA         </div> <div> <input type="checkbox"/> DKCS         </div> |
| <p><b>O</b></p> | <p>How <b>far is the medical facility</b> from your neighbourhood?</p> <p><i>H: Chikitsa suvidha aapke gao se kitni dur hai?</i></p> <p><i>T: me inti nundi asupatri enta duram?</i></p>                                         | <div> <input type="checkbox"/> &lt; 1 km             <input type="checkbox"/> DNA         </div> <div> <input type="checkbox"/> 1 - 5 km             <input type="checkbox"/> DKCS         </div> <div> <input type="checkbox"/> &gt; 5 km             <input type="checkbox"/> NA         </div>                                                                                                                                                                                                                                                                                                                                                                                                                                                                                                                                                                                                                                                                                                                                                                                                                   |
| <p><b>O</b></p> | <p>How do you reach the medical facility?</p>                                                                                                                                                                                    | <div> <input type="checkbox"/> Walk             <input type="checkbox"/> DNA         </div> <div> <input type="checkbox"/> Own vehicle             <input type="checkbox"/> DKCS         </div> <div> <input type="checkbox"/> Private Transport             <input type="checkbox"/> NA         </div> <div> <input type="checkbox"/> Public Transport             <input type="checkbox"/> </div>                                                                                                                                                                                                                                                                                                                                                                                                                                                                                                                                                                                                                                                                                                                 |
| <p><b>O</b></p> | <p>What are the <b>other problems</b> with the available health facilities</p> <p><i>H: aur kuch thakliv hai kya?</i></p> <p><i>T: inka emaina ebandulu unnai ah?</i></p>                                                        |                                                                                                                                                                                                                                                                                                                                                                                                                                                                                                                                                                                                                                                                                                                                                                                                                                                                                                                                                                                                                                                                                                                     |



|                              |                                                                                                                                                                                                                                            |                                                                                                                                                                                             |
|------------------------------|--------------------------------------------------------------------------------------------------------------------------------------------------------------------------------------------------------------------------------------------|---------------------------------------------------------------------------------------------------------------------------------------------------------------------------------------------|
| <p><b>O</b></p>              | <p>Do <b>women face</b> any specific <b>health issues</b>?</p> <p><i>H: Mahilao ko kisi vishesh swasth sambandhi pareshaani jhelni padti hai?</i></p> <p><i>T: me intlo adavallu emaina aarogyaniki sambandinchi ebandulu paddara?</i></p> | <div> <input type="checkbox"/> Yes             <input type="checkbox"/> DNA         </div> <div> <input type="checkbox"/> No             <input type="checkbox"/> DKCS         </div>       |
| <p><b>O</b></p>              | <p>If yes, what kind of issues do women face?</p>                                                                                                                                                                                          |                                                                                                                                                                                             |
| <p><b>4</b><br/><b>3</b></p> | <p>If <b>relocated</b>, how far was the <b>medical facility</b> from the previous location</p> <p><i>T: Meeru illu marina tarwata, asupatri me kotha inti nunchi enta duram?</i></p>                                                       | <div> <input type="checkbox"/> No Change             <input type="checkbox"/> Increased             <input type="checkbox"/> Reduced             <input type="checkbox"/> NA         </div> |

| <p><b>O . THREE MOST IMPORTANT THINGS TO YOUR FAMILY</b></p> |  |
|--------------------------------------------------------------|--|
| <p>1</p>                                                     |  |
| <p>2</p>                                                     |  |
| <p>3</p>                                                     |  |

| DIFFERENTLY ABLED PERSONS |                                                                                                                                                                              |                                                                                                                                                                                                                                    |
|---------------------------|------------------------------------------------------------------------------------------------------------------------------------------------------------------------------|------------------------------------------------------------------------------------------------------------------------------------------------------------------------------------------------------------------------------------|
| 0                         | <p>Are there any differently abled people in the house?</p> <p><i>H: Ghar par koi alag/ viklang sadasye hai?</i></p> <p><i>T: me intlo evaru aina vikalangulu unara?</i></p> | <div> <input type="checkbox"/> Yes           <input type="checkbox"/> DNA         </div> <div> <input type="checkbox"/> No           <input type="checkbox"/> DKCS         </div> <div> <input type="checkbox"/> NA         </div> |
| 0                         | Family member                                                                                                                                                                |                                                                                                                                                                                                                                    |
| 0                         | If yes, do they avail special incentives?                                                                                                                                    | <div> <input type="checkbox"/> Yes           <input type="checkbox"/> DNA         </div> <div> <input type="checkbox"/> No           <input type="checkbox"/> DKCS         </div> <div> <input type="checkbox"/> NA         </div> |
| 0                         | List of schemes                                                                                                                                                              |                                                                                                                                                                                                                                    |
| 4<br>3                    | Were they allotted with a new house?                                                                                                                                         | <div> <input type="checkbox"/> Yes           <input type="checkbox"/> DNA         </div> <div> <input type="checkbox"/> No           <input type="checkbox"/> DKCS         </div> <div> <input type="checkbox"/> NA         </div> |
| 0                         | What are the problems you face on regular basis?                                                                                                                             |                                                                                                                                                                                                                                    |
| 4<br>3                    | Was it a problem in the JNNURM site with Multi storyed structure?                                                                                                            |                                                                                                                                                                                                                                    |
| 4<br>3                    | Did you get a ground floor allocation?                                                                                                                                       |                                                                                                                                                                                                                                    |
| 4<br>3                    | What kind of trouble did they face before relocation?                                                                                                                        |                                                                                                                                                                                                                                    |
| 4<br>3                    | What kind of trouble did they face during Phailin/Hud hud?                                                                                                                   |                                                                                                                                                                                                                                    |

SITE OBSERVATIONS SHEET

|  | O                                                 | ROOF                                                                                                                                                                                                                                                                                                                                                                                                                                                                                                                                                                                                                                                                                                                                                                                                                                                                                                                                                                                                                                                                                                                                                                                                                                                                                       | WALL                                                                                                                                                                                                                     | PLINTH HEIGHT                                                                                                                                                                                                                 | MODIFICATIONS IN THE HOUSE ALLOTTED                                                                                                                         |
|--|---------------------------------------------------|--------------------------------------------------------------------------------------------------------------------------------------------------------------------------------------------------------------------------------------------------------------------------------------------------------------------------------------------------------------------------------------------------------------------------------------------------------------------------------------------------------------------------------------------------------------------------------------------------------------------------------------------------------------------------------------------------------------------------------------------------------------------------------------------------------------------------------------------------------------------------------------------------------------------------------------------------------------------------------------------------------------------------------------------------------------------------------------------------------------------------------------------------------------------------------------------------------------------------------------------------------------------------------------------|--------------------------------------------------------------------------------------------------------------------------------------------------------------------------------------------------------------------------|-------------------------------------------------------------------------------------------------------------------------------------------------------------------------------------------------------------------------------|-------------------------------------------------------------------------------------------------------------------------------------------------------------|
|  | Perception of risk in the site A (Original house) | <input type="checkbox"/> Temporary - Thatch/ Plastic<br><input type="checkbox"/> Temporary - Asbestos/ Others<br><input type="checkbox"/> RCC<br><input type="checkbox"/> NA<br><input type="checkbox"/> DKCS<br><input type="checkbox"/> DNA                                                                                                                                                                                                                                                                                                                                                                                                                                                                                                                                                                                                                                                                                                                                                                                                                                                                                                                                                                                                                                              | <input type="checkbox"/> Mud<br><input type="checkbox"/> Brick Mortar<br><input type="checkbox"/> Plastic/ Asbestos/ Tin<br><input type="checkbox"/> NA<br><input type="checkbox"/> DKCS<br><input type="checkbox"/> DNA | <input type="checkbox"/> Below Road level<br><input type="checkbox"/> Above Road level<br><input type="checkbox"/> Road level<br><input type="checkbox"/> NA<br><input type="checkbox"/> DKCS<br><input type="checkbox"/> DNA | <input type="checkbox"/> Yes<br><input type="checkbox"/> No<br><input type="checkbox"/> NA<br><input type="checkbox"/> DKCS<br><input type="checkbox"/> DNA |
|  | <b>4, 2 &amp; 3</b>                               |                                                                                                                                                                                                                                                                                                                                                                                                                                                                                                                                                                                                                                                                                                                                                                                                                                                                                                                                                                                                                                                                                                                                                                                                                                                                                            |                                                                                                                                                                                                                          |                                                                                                                                                                                                                               |                                                                                                                                                             |
|  | Perception of risk in the site B (JNNURM site)    | <input type="checkbox"/> Temporary - Thatch/ Plastic<br><input type="checkbox"/> Temporary - Asbestos/ Others<br><input type="checkbox"/> RCC<br><input type="checkbox"/> NA<br><input type="checkbox"/> DKCS<br><input type="checkbox"/> DNA                                                                                                                                                                                                                                                                                                                                                                                                                                                                                                                                                                                                                                                                                                                                                                                                                                                                                                                                                                                                                                              | <input type="checkbox"/> Mud<br><input type="checkbox"/> Brick Mortar<br><input type="checkbox"/> Plastic/ Asbestos/ Tin<br><input type="checkbox"/> NA<br><input type="checkbox"/> DKCS<br><input type="checkbox"/> DNA | <input type="checkbox"/> Below Road level<br><input type="checkbox"/> Above Road level<br><input type="checkbox"/> Road level<br><input type="checkbox"/> NA<br><input type="checkbox"/> DKCS<br><input type="checkbox"/> DNA | <input type="checkbox"/> Yes<br><input type="checkbox"/> No<br><input type="checkbox"/> NA<br><input type="checkbox"/> DKCS<br><input type="checkbox"/> DNA |
|  | O Any other observations                          |                                                                                                                                                                                                                                                                                                                                                                                                                                                                                                                                                                                                                                                                                                                                                                                                                                                                                                                                                                                                                                                                                                                                                                                                                                                                                            |                                                                                                                                                                                                                          |                                                                                                                                                                                                                               |                                                                                                                                                             |
|  | O Other shocks in the family                      | <div style="display: flex; flex-wrap: wrap;"> <div style="width: 50%;"> <input type="checkbox"/> Financial loans and high interest rates<br/> <input type="checkbox"/> Health issues<br/> <input type="checkbox"/> Lack of livelihood options and safety nets<br/> <input type="checkbox"/> Deaths in family<br/> <input type="checkbox"/> Women headed household<br/> <input type="checkbox"/> Weak house (rains, etc.)<br/> <input type="checkbox"/> Locational problems (sea shore, etc.)<br/> <input type="checkbox"/> Lack of fishing activity / food produce / cattle<br/> <input type="checkbox"/> Evictions<br/> <input type="checkbox"/> Sold land                             </div> <div style="width: 50%;"> <input type="checkbox"/> Monkey Menace<br/> <input type="checkbox"/> Cyclone related damages and lack of sufficient relief<br/> <input type="checkbox"/> Accidents and fires<br/> <input type="checkbox"/> Migration<br/> <input type="checkbox"/> Relocation<br/> <input type="checkbox"/> Lack of BPL card / Ration card<br/> <input type="checkbox"/> Alcoholism<br/> <input type="checkbox"/> Multiple shocks<br/> <input type="checkbox"/> NA<br/> <input type="checkbox"/> DKCS<br/> <input type="checkbox"/> DNA                             </div> </div> |                                                                                                                                                                                                                          |                                                                                                                                                                                                                               |                                                                                                                                                             |
