# Supplementary material
Source: MDPI journal article supplement (https://www.mdpi.com/2071-1050/12/15/5958)
Supplement: s1 [file s1]

# Reducing Relocation Risk in Urban India Site Report for Urban Risks and Resettlements

**Section III**  
Data from primary work

**Credits** by Garima Jain, Amir Bazaz; Rohit Jigyasu; Teja Malladi; Sushmita Ramoji; Sunil Kraleti; Aishwarya Balasubramanian; Andaleeb Rehman; Mohan Raju JS from Indian Institute for Human Settlements

July 2016

**This document is an output from a project funded by the UK Department for International Development (DFID) and the Netherlands Directorate-General for International Cooperation (DGIS) for the benefit of developing countries. However, the views expressed and information contained in it are not necessarily those of or endorsed by DFID, DGIS or the entities managing the delivery of the Climate and Development Knowledge Network, which can accept no responsibility or liability for such views, completeness or accuracy of the information or for any reliance placed on them.**

The Research project Reducing Relocation Risk in urban areas is carried out by The Bartlett Development Planning Unit (DPU) at UCL, the Indian Institute for Human Settlements (IIHS) the Latin American Social Science Faculty (Facultad Latinoamericana de Ciencias Sociales (FLACSO), and Makerere University.

This report is downloadable for free from: **[www.bartlett.ucl.ac.uk/dpu/reducing-relocation-risk/](http://www.bartlett.ucl.ac.uk/dpu/reducing-relocation-risk/)**

The findings, interpretations and conclusions expressed here do not represent the views of any organisations that have provided institutional, organisational or financial support for the preparation of this paper

**Designing Support** by Pallavi Sharma and Nawaz Khan



# Reducing Relocation Risk in Urban India

## Site Report for Urban Risks and Resettlements

---

**Section III**  
Data from primary work

**Lead Author**  
Garima Jain

**Project Team**  
Amir Bazaz; Rohit Jigyasu  
Teja Malladi; Sushmita Ramoji; Sunil Kraleti  
Aishwarya Balasubramanian  
Andaleeb Rehman; Mohan Raju JS

**Reviewed by**  
Aromar Revi; Chandni Singh

**Edited by**  
Arpita Das, Rekha Raghunathan



---

## Table of Contents

---

|                                                       |    |
|-------------------------------------------------------|----|
| Descriptive Statistics of the Sample .....            | 7  |
| Primary survey findings of Post Cyclone Effects ..... | 25 |
| Resttlement & Relocation interventions findings ..... | 43 |



## Descriptive Statistics of the Sample

The following are some descriptive statistics of the sample surveyed during field work:

### Average no. of family members by rural and urban.

While most of the families in the rural context (both Odisha and AP), were primarily nuclear in nature, the families in urban Odisha and AP seemed to have a larger number of family members living together, potentially because of the lack of choice as well as the constraints to move out to alternate spaces. It is difficult to say if this is a way to pool risk or share resources in a way that the outcomes for all are better, or if one problem can act as a stressor for all in the household. But the larger

to understand the dynamics of such an arrangement and how it helps in reducing household-level risk.

### Average no. of working members in a family

Comparing this with the above statistic, the families we surveyed seemed to have more people on average working in the urban areas versus the rural areas. This could also be an outcome of costs in the urban areas being higher than those in the rural areas. Working members and their high numbers could be partly explained through the informal nature of jobs or the fact of jobs being seasonal. This kind of skill pooling could be a way of compensating for other socio-economic risks

| Family members statistic                  | Rural AP | Rural Odisha | Urban AP | Urban Odisha | Grand Total of Sample |
|-------------------------------------------|----------|--------------|----------|--------------|-----------------------|
| Average of total number of Family Members | 4.2      | 4.2          | 4.1      | 4.8          | <b>4.3</b>            |
| Maximum of total number of Family Members | 7        | 8            | 10       | 11           | <b>11</b>             |
| Minimum of total number of Family Members | 3        | 2            | 1        | 2            | <b>1</b>              |

question is whether it is a cost to break these networks, and could it add to the burden of these families. There is some benefit that is a derivative of such an arrangement which intuitively is in some ways a coping or adaptive mechanism. It is difficult to say whether such arrangements are structurally embedded but it will be interesting

faced by households. These reasons and others could be explored through additional research. Although people were asked about their incomes the stated incomes may have response biases, hence we are not stating them at this point.

| Working members statistic                  | Rural AP | Rural Odisha | Urban AP | Urban Odisha | Grand Total of Sample |
|--------------------------------------------|----------|--------------|----------|--------------|-----------------------|
| Average no. of working members in a family | 1.8      | 1.6          | 1.6      | 2            | <b>1.7</b>            |
| Maximum no. of working members in a family | 3        | 4            | 4        | 6            | <b>6</b>              |
| Minimum no. of working members in a family | 1        | 1            | 0        | 1            | <b>0</b>              |

### Male vs. Female headed households

For the sake of simplicity and brevity, the question that was asked was 'Who takes the big decisions in the family—decisions of marriage, investment, etc.' Other than that, we do not have information on who took the financial versus domestic decisions. We encountered a large number of families that were headed by women (41 out of 157) and many where the family as a whole including the woman took decisions (29 out of 157). One of the reasons for more female enterprise here could be prevalent male migration, which has created a situation where it is the woman who is now making all decisions, big or small. But this phenomenon may need to be studied in greater detail.

nisms that ensure equity? In the long term (beyond the scope of this research) some of these trajectories could be taken up for a longitudinal study within the existing sites.

### Levels of education and reasons for dropping out of school

The predominant levels of education seem to be limited to Class 7, particularly among women. One reason pointed out was that free public education was available till that level after which financial reasons forced people to drop out. Other reasons quoted for not pursuing higher education (particularly in the rural areas) was that there were no education facilities nearby, and that

| Head of the family | Rural AP | Rural Odisha | Urban AP | Urban Odisha | Grand Total of Sample |
|--------------------|----------|--------------|----------|--------------|-----------------------|
| Male               | 3        | 17           | 33       | 24           | <b>77</b>             |
| Female             | 2        | 8            | 16       | 15           | <b>41</b>             |
| Male and Female    | 0        | 13           | 3        | 13           | <b>29</b>             |
| Others             | 0        | 13           | 6        | 3            | <b>9</b>              |
| DKCS               |          | 1            |          |              | <b>1</b>              |

The differential outcomes of female headed households vs. male headed households in terms of living conditions, impact of cyclones, beneficiary identification and the outcomes of the relocation processes may need to be studied in greater detail with a larger sample size. Is leadership maintained at the household level after the relocation interventions? Are there institutional mecha-

women were not allowed to travel far or stay away from the home for safety/cultural reasons. More instances of higher education were noticed among male respondents in urban areas but in Berhampur particularly, many instances of under-employment were also observed where higher education did not guarantee a formal job.

| Level of education of main responder (by gender)         | Rural AP | Urban AP  | Rural Odisha | Urban Odisha | Total     |
|----------------------------------------------------------|----------|-----------|--------------|--------------|-----------|
| <b>Female</b>                                            | <b>2</b> | <b>26</b> | <b>14</b>    | <b>25</b>    | <b>67</b> |
| Illiterate                                               | 2        | 16        | 5            | 10           | <b>33</b> |
| Primary ( 1st - 4th)                                     |          |           | 1            | 2            | <b>3</b>  |
| Middle ( 5th - 7th)                                      |          | 4         | 4            | 5            | <b>13</b> |
| Matriculation/Secondary (8th - 10th)                     |          | 4         |              | 4            | <b>8</b>  |
| High/ Senior secondary/ Intermediate/Pre University      |          |           | 1            |              | <b>1</b>  |
| Non-technical diploma or certificate not equal to degree |          |           |              |              | <b>0</b>  |
| Graduate and above                                       |          | 2         |              | 1            | <b>3</b>  |
| DKCS                                                     |          |           | 3            | 1            | <b>4</b>  |



| Level of education of main responder (by gender)         | Rural AP            | Urban AP          | Rural Odisha                        | Urban Odisha | Total          |             |             |
|----------------------------------------------------------|---------------------|-------------------|-------------------------------------|--------------|----------------|-------------|-------------|
| DNA                                                      |                     |                   |                                     | 2            | 2              |             |             |
| Male                                                     | 3                   | 32                | 26                                  | 30           | 91             |             |             |
| Illiterate                                               | 3                   | 9                 | 7                                   | 4            | 23             |             |             |
| Below Primary                                            |                     | 1                 | 1                                   |              | 2              |             |             |
| Primary ( 1st - 4th)                                     |                     |                   | 2                                   | 5            | 7              |             |             |
| Middle ( 5th - 7th)                                      |                     | 8                 | 5                                   | 7            | 20             |             |             |
| Matriculation/Secondary (8th - 10th)                     |                     | 11                | 3                                   | 9            | 23             |             |             |
| High/ Senior secondary/ Intermediate/Pre University      |                     | 1                 | 1                                   | 1            | 3              |             |             |
| Non-technical diploma or certificate not equal to degree |                     | 1                 |                                     | 1            | 2              |             |             |
| Graduate and above                                       |                     | 1                 | 2                                   | 1            | 4              |             |             |
| DKCS                                                     |                     |                   | 4                                   | 2            | 6              |             |             |
| DNA                                                      |                     |                   | 1                                   |              | 1              |             |             |
|                                                          |                     |                   |                                     |              |                |             |             |
| Reasons for dropping by main responder                   | Family didn't allow | Financial Reasons | Health related - including handicap | Marriage     | Never attended | No interest | Grand Total |
| 1: Non Beneficiary                                       | 1                   | 9                 |                                     | 2            | 7              | 4           | 23          |
| Rural AP                                                 |                     | 2                 |                                     |              | 2              |             | 4           |
| Rural Odisha                                             |                     | 2                 |                                     | 1            | 4              |             | 7           |
| Urban AP                                                 | 1                   | 5                 |                                     | 1            | 1              | 4           | 12          |
| 2: In Situ Housing                                       |                     | 1                 |                                     | 1            |                |             | 2           |
| Urban AP                                                 |                     | 1                 |                                     | 1            |                |             | 2           |
| 3: Relocation in process                                 |                     | 6                 |                                     | 1            | 3              | 1           | 11          |
| Rural Odisha                                             |                     | 6                 |                                     | 1            | 3              | 1           | 11          |
| 4: Relocated                                             | 1                   | 14                |                                     | 5            | 7              | 7           | 34          |
| Rural Odisha                                             |                     | 3                 |                                     |              | 4              | 2           | 9           |
| Urban AP                                                 | 1                   | 11                |                                     | 5            | 3              | 5           | 25          |
| 5: Infrastructure Upgradation                            |                     | 5                 | 1                                   | 2            | 6              |             | 14          |
| Urban Odisha                                             |                     | 5                 | 1                                   | 2            | 6              |             | 14          |
| 6: Identified for relocation                             | 1                   | 12                |                                     | 2            | 8              | 1           | 24          |
| Urban Odisha                                             | 1                   | 12                |                                     | 2            | 8              | 1           | 24          |
| Grand Total                                              | 3                   | 47                | 1                                   | 13           | 31             | 13          | 108         |

### Livelihoods practiced. Sources of livelihood

Of the 151 responses regarding primary sources of livelihood and additional sources of income (in some cases more than 1 per household), most households (46 HHs) in urban areas are involved in daily wage work

sites, and this governs their destinations (Chennai, Goa, Vizag, etc.), but those who are predominantly agriculturalists or horticulturists migrated to work in industries or as daily wage workers during off-seasons. Studying this distinction may provide some insights on current capacities to adapt by types of livelihood.

| Livelihood prevalence                                                                                                                                                                                                                              | Rural AP | Rural Odisha | Urban AP | Urban Odisha | Grand Total of Sample |
|----------------------------------------------------------------------------------------------------------------------------------------------------------------------------------------------------------------------------------------------------|----------|--------------|----------|--------------|-----------------------|
| Fishing                                                                                                                                                                                                                                            | 5        | 10           | 7        |              | <b>22</b>             |
| Agriculture                                                                                                                                                                                                                                        |          | 7            |          |              | <b>7</b>              |
| Horticulture                                                                                                                                                                                                                                       |          | 13           |          |              | <b>13</b>             |
| Animal Rearing                                                                                                                                                                                                                                     |          |              |          | 8            | <b>8</b>              |
| Daily Wage / Casual Labour                                                                                                                                                                                                                         |          |              | 23       | 23           | <b>46</b>             |
| Regular Wage/ salaried                                                                                                                                                                                                                             |          |              | 10       | 5            | <b>15</b>             |
| Other livelihoods*                                                                                                                                                                                                                                 |          |              | 31       | 19           | <b>50</b>             |
| Migration                                                                                                                                                                                                                                          |          | 17           |          | 5            | <b>22</b>             |
| <i>*Other = Entrepreneurial/ independent forms of work</i><br><i>Note: Migration numbers could be biased due to the fact that we may have visited at a certain time of the year where we didn't meet the people who were already migrating out</i> |          |              |          |              |                       |

or work as casual labour which could partly explain the higher number of working members per family. Many households (50 HH) were also involved in other forms of entrepreneurial work such as small shops or in-house small-scale industry, etc. A large number of people were involved in fishing (selection bias as most of the cyclone-affected families stay close to the coasts), but many also practise horticulture and agriculture (primarily in rural Odisha). Many of these could also be forms of daily wage work, as many of them worked in other people's farms or boats rather than having access to their own resources. Many families noted more than one form of livelihood including migration, which may be a form of risk-mitigation strategy. It could be a burden if these forms of support, networks and informal safety nets are broken down by any external intervention, like relocating some members of these communities, and need to be studied more closely. It was also observed that the fisher communities who migrated continued to fish in the new

### Households with any alternate source of income

About 46 out of 158 HHs mentioned they had additional sources of income in the family, which included holding multiple jobs, or having access to pension schemes, etc. The relationship between type of livelihood and alternate sources of income could be studied to ascertain if the time spent on certain kinds of livelihood allows time for alternate work, and if following the relocation, there is an opportunity cost to not continue working.

Does the location itself enable an ability to earn through alternate livelihoods and does the new location destroy these abilities or opportunities? A time-allocation study to see how time is expended for something that may have been avoided in an earlier location could be conducted. This could also provide insights for programmes like the mason training programme, where people were required to get trained for 30–60 days to construct their

| Additional Source of Income in the family | Rural AP | Rural Odisha | Urban AP  | Urban Odisha | Grand Total |
|-------------------------------------------|----------|--------------|-----------|--------------|-------------|
| No                                        | 5        | 20           | 49        | 38           | <b>112</b>  |
| Yes                                       |          | 20           | 9         | 17           | <b>46</b>   |
| <b>Grand Total</b>                        | <b>5</b> | <b>40</b>    | <b>58</b> | <b>55</b>    | <b>158</b>  |

own houses, or for owner-driven or self-construction housing programmes. Also, it may be enquired if this work is seasonal or continues through the year to know more about risk mitigation through livelihood diversification practices.

### Households willing to migrate to other areas, if given a chance

Migration is often an aspiration for a better life, but also an adaptation method to get away from the current conditions of living. People who are non-migrants in cities are more likely to be poor as compared to rural-to-urban or urban-to-urban migrants (Kundu, 2007), as migration is also an indication of choice and the ability to adapt.

showing a kind of helplessness. Many also vehemently opposed the idea of migrating from their 'land of birth' (20 out of 55 of which 16 were in rural Odisha).

### Aspirations of future generation to work by current type of professions

Most people we interviewed said that they would want their children to have better jobs than them and be educated. Evidently, getting government jobs particularly with the police is a huge aspiration. But while many farmers (2 out of 2) and horticulturists (3 out of 7) said that they would want their children to get educated, only fisher-families said that they would want their children to continue their profession but with bigger boats and

| Household willing to migrate | Rural AP | Rural Odisha | Urban AP  | Urban Odisha | Grand Total |
|------------------------------|----------|--------------|-----------|--------------|-------------|
| Yes                          |          |              | 2         | 1            | 3           |
| Yes, if there's work         |          | 1            | 4         | 2            | 7           |
| Don't mind, but cannot       |          | 1            | 1         | 1            | 3           |
| Not by choice                |          | 1            |           | 1            | 2           |
| No                           | 1        | 2            | 10        | 3            | 16          |
| Already migrate              |          | 16           |           | 4            | 20          |
| Move back                    |          | 1            | 3         |              | 4           |
| <b>Grand Total</b>           | <b>1</b> | <b>22</b>    | <b>20</b> | <b>12</b>    | <b>55</b>   |

Of the households who responded (55HHs) to the question if they would be willing to migrate given a chance, many (10 HHs) said yes or did so with the condition that work be available. Many (20 HHs) mentioned they were already practising migration within the family. Some (3 HHs) also said they would do so but there are limitations because of which they cannot. Some expressed concerns about how they would migrate, but not by choice,

nets. Pudimadaka was an exception, where even the fisher communities hoped for their children to get jobs in nearby upcoming special economic zones and industries and not continue fishing. Here it is increasingly becoming economically non-viable for small-scale fishermen. Most of the daily wage workers (19 out of 20) said that they would want their children to be educated unlike themselves and have better jobs.

| Aspirations for future generations | Rural AP | Rural Odisha | Urban AP | Urban Odisha | Grand Total |
|------------------------------------|----------|--------------|----------|--------------|-------------|
| Continue our profession but better | 1        | 3            | 1        |              | 5           |
| Educate and get jobs               | 2        | 17           | 17       | 20           | 56          |
| Work as a police / govt. job       |          | 5            | 8        | 6            | 19          |
| Work in Industries                 | 1        |              |          | 1            | 2           |
| Others (marriage, etc.)            |          | 1            |          |              | 1           |
| Good human being                   |          | 1            |          |              | 1           |
| Not in our control                 | 1        | 3            | 4        | 1            | 9           |
| DKCS                               |          | 5            | 6        | 9            | 20          |

| Aspirations for future generations                                                | Rural AP                           |                      | Rural Odisha     |                    | Urban AP                |                            | Urban Odisha       |             | Grand Total |
|-----------------------------------------------------------------------------------|------------------------------------|----------------------|------------------|--------------------|-------------------------|----------------------------|--------------------|-------------|-------------|
| DNA                                                                               |                                    |                      | 4                |                    | 6                       |                            | 16                 |             | 26          |
| NA                                                                                |                                    |                      | 1                |                    | 14                      |                            | 1                  |             | 16          |
| Grand Total                                                                       | 5                                  |                      | 40               |                    | 56                      |                            | 54                 |             | 155         |
|                                                                                   |                                    |                      |                  |                    |                         |                            |                    |             |             |
|                                                                                   |                                    |                      |                  |                    |                         |                            |                    |             |             |
| Aspirations for future generations by current professions or forms of livelihoods | Continue our profession but better | Educate and get jobs | Good human being | Not in our control | Others (marriage, etc.) | Work as police / govt. job | Work in Industries | Grand Total |             |
| Fishing                                                                           | 4                                  | 8                    | 1                | 3                  | 1                       | 1                          | 1                  | 19          |             |
| Agriculture                                                                       |                                    | 2                    |                  |                    |                         |                            |                    | 2           |             |
| Horticulture                                                                      |                                    | 3                    |                  |                    | 1                       | 3                          |                    | 7           |             |
| Daily wage/ Casual Labour                                                         |                                    | 14                   |                  | 1                  |                         | 5                          |                    | 20          |             |
| Regular salaried                                                                  |                                    | 7                    |                  | 1                  |                         | 1                          |                    | 9           |             |
| Animal Rearing                                                                    |                                    | 1                    |                  |                    |                         | 1                          | 1                  | 3           |             |
| Other work                                                                        |                                    | 18                   |                  | 3                  |                         | 9                          |                    | 30          |             |

### House construction materials

This could be used to assess what the original living conditions were when the cyclone hit, and if people were correctly identified to be beneficiaries of such housing programmes and interventions. Of the non-beneficiaries, 22 out of 33 respondents were living in thatch/asbestos/plastic roofed structures, most of whom (14 out of 22) were in urban AP. This gives some sense of Type1 errors

(non-beneficiaries with fragile structures). It was difficult to observe the housing conditions of those who had already relocated. Therefore, it is difficult to assess the Type 2 errors (beneficiaries with non-fragile structures) that may have crept into the allocations.

Besides roofing material, wall and plinth are other indicators for physical vulnerabilities, which otherwise do not seem to be considered for housing allocation.

| House Construction Materials                            | Rural AP | Rural Odisha | Urban AP  | Urban Odisha | Grand Total |
|---------------------------------------------------------|----------|--------------|-----------|--------------|-------------|
| <b>Roof material in the current sites of habitation</b> |          |              |           |              |             |
| <b>1: Non Beneficiary</b>                               | <b>5</b> | <b>6</b>     | <b>22</b> |              | <b>33</b>   |
| RCC                                                     |          | 3            | 8         |              | 11          |
| Asbestos/ Others                                        | 1        | 1            | 4         |              | 6           |
| Thatch/ Plastic                                         | 4        | 2            | 10        |              | 16          |
| <b>2: In Situ Housing</b>                               |          | <b>5</b>     |           |              | <b>5</b>    |
| RCC                                                     |          | 3            |           |              | 3           |
| Asbestos/ Others                                        |          | 1            |           |              | 1           |
| Thatch/ Plastic                                         |          | 1            |           |              | 1           |
| <b>3: Relocation in process</b>                         |          | <b>13</b>    |           |              | <b>13</b>   |
| RCC                                                     |          | 2            |           |              | 2           |
| Asbestos/ Others                                        |          | 2            |           |              | 2           |

| House Construction Materials                    | Rural AP | Rural Odisha | Urban AP  | Urban Odisha | Grand Total |
|-------------------------------------------------|----------|--------------|-----------|--------------|-------------|
| Thatch/ Plastic                                 |          | 9            |           |              | 9           |
| <b>4: Relocated</b>                             |          | <b>11</b>    | <b>36</b> |              | <b>47</b>   |
| RCC                                             |          | 11           | 27        |              | 38          |
| Asbestos/ Others                                |          |              | 2         |              | 2           |
| Thatch/ Plastic                                 |          |              | 6         |              | 6           |
| <b>5: Infrastructure Upgradation</b>            |          |              |           | <b>16</b>    | <b>16</b>   |
| RCC                                             |          |              |           | 6            | 6           |
| Asbestos/ Others                                |          |              |           | 7            | 7           |
| Thatch/ Plastic                                 |          |              |           | 3            | 3           |
| <b>6: Identified for relocation</b>             |          |              |           | <b>34</b>    | <b>34</b>   |
| RCC                                             |          |              |           | 5            | 5           |
| Asbestos/ Others                                |          |              |           | 21           | 21          |
| Thatch/ Plastic                                 |          |              |           | 8            | 8           |
| <b>Grand Total</b>                              | <b>5</b> | <b>35</b>    | <b>57</b> | <b>50</b>    | <b>147</b>  |
| <b>Wall type in current sites of habitation</b> |          |              |           |              |             |
| <b>1: Non Beneficiary</b>                       | <b>5</b> | <b>6</b>     | <b>22</b> |              | <b>33</b>   |
| Brick Mortar                                    | 1        | 3            | 13        |              | 17          |
| Mud                                             | 4        | 3            | 8         |              | 15          |
| Plastic/ Asbestos/ Tin                          |          |              | 1         |              | 1           |
| <b>2: In Situ Housing</b>                       |          | <b>5</b>     |           |              | <b>5</b>    |
| Brick Mortar                                    |          | 4            |           |              | 4           |
| Mud                                             |          | 1            |           |              | 1           |
| <b>3: Relocation in process</b>                 |          | <b>13</b>    |           |              | <b>13</b>   |
| Brick Mortar                                    |          | 6            |           |              | 6           |
| Mud                                             |          | 7            |           |              | 7           |
| <b>4: Relocated</b>                             |          | <b>11</b>    | <b>29</b> |              | <b>40</b>   |
| Brick Mortar                                    |          | 11           | 29        |              | 40          |
| <b>5: Infrastructure Upgradation</b>            |          |              |           | <b>16</b>    | <b>16</b>   |
| Brick Mortar                                    |          |              |           | 12           | 12          |
| Mud                                             |          |              |           | 4            | 4           |
| <b>6: Identified for relocation</b>             |          |              |           | <b>35</b>    | <b>35</b>   |
| Brick Mortar                                    |          |              |           | 22           | 22          |
| Mud                                             |          |              |           | 7            | 7           |
| Plastic/ Asbestos/ Tin                          |          |              |           | 6            | 6           |
| <b>Grand Total</b>                              | <b>5</b> | <b>35</b>    | <b>57</b> | <b>51</b>    | <b>142</b>  |
| <b>Plinth Height in current sites</b>           |          |              |           |              |             |
| <b>1: Non Beneficiary</b>                       | <b>5</b> | <b>5</b>     | <b>22</b> |              | <b>32</b>   |
| Above Road level                                | 1        | 4            | 3         |              | 8           |

| House Construction Materials         | Rural AP | Rural Odisha | Urban AP  | Urban Odisha | Grand Total |
|--------------------------------------|----------|--------------|-----------|--------------|-------------|
| Road level                           | 3        | 1            | 10        |              | 14          |
| Below Road level                     | 1        |              | 2         |              | 3           |
| DNA                                  |          |              | 7         |              | 7           |
| <b>2: In Situ Housing</b>            |          | <b>5</b>     |           |              | <b>5</b>    |
| Above Road level                     |          | 4            |           |              | 4           |
| Road level                           |          | 1            |           |              | 1           |
| <b>3: Relocation in process</b>      |          | <b>11</b>    |           |              | <b>11</b>   |
| Above Road level                     |          | 6            |           |              | 6           |
| Road level                           |          | 5            |           |              | 5           |
| <b>4: Relocated</b>                  |          | <b>9</b>     | <b>36</b> |              | <b>45</b>   |
| Above Road level                     |          | 9            |           |              | 9           |
| Road level                           |          |              | 3         |              | 3           |
| Below Road level                     |          |              | 3         |              | 3           |
| DNA                                  |          |              | 30        |              | 30          |
| <b>5: Infrastructure Upgradation</b> |          |              |           | <b>14</b>    | <b>14</b>   |
| Above Road level                     |          |              |           | 9            | 9           |
| Road level                           |          |              |           | 5            | 5           |
| <b>6: Identified for relocation</b>  |          |              |           | <b>28</b>    | <b>28</b>   |
| Above Road level                     |          |              |           | 18           | 18          |
| Road level                           |          |              |           | 10           | 10          |
| <b>Grand Total</b>                   | <b>5</b> | <b>30</b>    | <b>58</b> | <b>42</b>    | <b>135</b>  |

### Asset ownership

Of all the households (158 HHs), 80 said they had gas stoves, 94 had some furniture, 76 had televisions, 90 had other electronics (like fan, fridge, etc.), 41 had bicycles, 37 had two wheelers, and 5 had 4-wheelers. 34 said they had work-related assets, but this could be

an underestimation. 22 said they had some animals or pets. But the most used asset across the regions was a mobile phone; 129 HHs said they had at least 1 mobile phone in the family. This could be assessed further to know more about people's strategies of accumulation and risk-coping abilities (Moser & Dani, 2008).

| Asset Ownership               | Rural AP | Rural Odisha | Urban AP  | Urban Odisha | Grand Total |
|-------------------------------|----------|--------------|-----------|--------------|-------------|
| <b>Gas Stove</b>              |          |              |           |              |             |
| 1: Non Beneficiary            | 2        | 2            | 15        |              | 19          |
| 3: Relocation in process      |          | 3            |           |              | 3           |
| 4: Relocated                  |          | 4            | 32        |              | 36          |
| 5: Infrastructure Upgradation |          |              |           | 9            | 9           |
| 6: Identified for relocation  |          |              |           | 13           | 13          |
| <b>Grand Total</b>            | <b>2</b> | <b>9</b>     | <b>47</b> | <b>22</b>    | <b>80</b>   |
| <b>Furniture</b>              |          |              |           |              |             |
| 1: Non Beneficiary            | 1        | 7            | 12        |              | 20          |
| 2: In Situ Housing            |          | 2            |           |              | 2           |



| Asset Ownership                                 | Rural AP | Rural Odisha | Urban AP  | Urban Odisha | Grand Total |
|-------------------------------------------------|----------|--------------|-----------|--------------|-------------|
| 3: Relocation in process                        |          | 6            |           |              | 6           |
| 4: Relocated                                    |          | 7            | 26        |              | 33          |
| 5: Infrastructure Upgradation                   |          |              |           | 12           | 12          |
| 6: Identified for relocation                    |          |              |           | 21           | 21          |
| <b>Grand Total</b>                              | <b>1</b> | <b>22</b>    | <b>38</b> | <b>33</b>    | <b>94</b>   |
| <b>Television</b>                               |          |              |           |              |             |
| 1: Non Beneficiary                              | 3        | 6            | 16        |              | 25          |
| 3: Relocation in process                        |          | 3            |           |              | 3           |
| 4: Relocated                                    |          | 3            | 27        |              | 30          |
| 5: Infrastructure Upgradation                   |          |              |           | 6            | 6           |
| 6: Identified for relocation                    |          |              |           | 12           | 12          |
| <b>Grand Total</b>                              | <b>3</b> | <b>12</b>    | <b>43</b> | <b>18</b>    | <b>76</b>   |
| <b>Other electronics like fan, fridge, etc.</b> |          |              |           |              |             |
| 1: Non Beneficiary                              | 1        | 6            | 9         |              | 16          |
| 2: In Situ Housing                              |          | 2            |           |              | 2           |
| 3: Relocation in process                        |          | 7            |           |              | 7           |
| 4: Relocated                                    |          | 6            | 20        |              | 26          |
| 5: Infrastructure Upgradation                   |          |              |           | 16           | 16          |
| 6: Identified for relocation                    |          |              |           | 23           | 23          |
| <b>Grand Total</b>                              | <b>1</b> | <b>21</b>    | <b>29</b> | <b>39</b>    | <b>90</b>   |
| <b>Mobile phone</b>                             |          |              |           |              |             |
| 1: Non Beneficiary                              | 3        | 7            | 18        |              | 28          |
| 2: In Situ Housing                              |          | 4            |           |              | 4           |
| 3: Relocation in process                        |          | 13           |           |              | 13          |
| 4: Relocated                                    |          | 6            | 35        |              | 41          |
| 5: Infrastructure Upgradation                   |          |              |           | 17           | 17          |
| 6: Identified for relocation                    |          |              |           | 26           | 26          |
| <b>Grand Total</b>                              | <b>3</b> | <b>30</b>    | <b>53</b> | <b>43</b>    | <b>129</b>  |
| <b>Bicycle</b>                                  |          |              |           |              |             |
| 1: Non Beneficiary                              |          | 1            | 6         |              | 7           |
| 3: Relocation in process                        |          | 2            |           |              | 2           |
| 4: Relocated                                    |          | 5            | 6         |              | 11          |
| 5: Infrastructure Upgradation                   |          |              |           | 7            | 7           |
| 6: Identified for relocation                    |          |              |           | 14           | 14          |
| <b>Grand Total</b>                              |          | <b>8</b>     | <b>12</b> | <b>21</b>    | <b>41</b>   |
| <b>2-Wheeler ownership</b>                      |          |              |           |              |             |
| 1: Non Beneficiary                              |          | 4            | 4         |              | 8           |
| 2: In Situ Housing                              |          | 3            |           |              | 3           |

| Asset Ownership                               | Rural AP | Rural Odisha | Urban AP  | Urban Odisha | Grand Total |
|-----------------------------------------------|----------|--------------|-----------|--------------|-------------|
| 3: Relocation in process                      |          | 2            |           |              | 2           |
| 4: Relocated                                  |          | 4            | 7         |              | 11          |
| 5: Infrastructure Upgradation                 |          |              |           | 5            | 5           |
| 6: Identified for relocation                  |          |              |           | 8            | 8           |
| <b>Grand Total</b>                            |          | <b>13</b>    | <b>11</b> | <b>13</b>    | <b>37</b>   |
| <b>4-Wheeler ownership</b>                    |          |              |           |              |             |
| 1: Non Beneficiary                            |          | 1            |           |              | 1           |
| 4: Relocated                                  |          |              | 3         |              | 3           |
| 6: Identified for relocation                  |          |              |           | 1            | 1           |
| <b>Grand Total</b>                            |          | <b>1</b>     | <b>3</b>  | <b>1</b>     | <b>5</b>    |
| <b>Other work related / productive assets</b> |          |              |           |              |             |
| 1: Non Beneficiary                            | 1        | 2            | 5         |              | 8           |
| 2: In Situ Housing                            |          | 2            |           |              | 2           |
| 4: Relocated                                  |          | 3            | 19        |              | 22          |
| 6: Identified for relocation                  |          |              |           | 2            | 2           |
| <b>Grand Total</b>                            | <b>1</b> | <b>7</b>     | <b>24</b> | <b>2</b>     | <b>34</b>   |
| <b>Animals / pets</b>                         |          |              |           |              |             |
| 1: Non Beneficiary                            |          | 1            | 1         |              | 2           |
| 2: In Situ Housing                            |          | 3            |           |              | 3           |
| 3: Relocation in process                      |          | 3            |           |              | 3           |
| 4: Relocated                                  |          |              | 2         |              | 2           |
| 5: Infrastructure Upgradation                 |          |              |           | 6            | 6           |
| 6: Identified for relocation                  |          |              |           | 6            | 6           |
| <b>Grand Total</b>                            |          | <b>7</b>     | <b>3</b>  | <b>12</b>    | <b>22</b>   |

### Desire for a new house as a public provision

Of the sample that was asked 'Do you want a new house from the government', the responses varied between yes of any kind, yes but in situ, yes, even relocation, and no. Of the non-beneficiaries, 33 of the 35 respondents said that they would like the government to provide a house, of which 21 said that they would like an in-situ house. In contrast were those who were relocated (44 HHs)—4 HHs said they did not want a house, and 11 of them said that they would have liked to get

it in-situ instead. Of those who said yes to the need for a new house, particularly among the non-beneficiaries, 13 of 34 HHs said their current houses were not strong to withstand rains and cyclones. Other reasons quoted were the need to have a patta (ownership or occupancy certificate), or to own a house (particularly by those who were currently renters). Of those relocated, 11 out of 29 gave renting previously as their primary motivation to relocate, and 8 of 29 said they wanted a patta to a safe house.

| Desire/Reason for a new house                     | Rural AP | Rural Odisha | Urban AP  | Urban Odisha | Grand Total |
|---------------------------------------------------|----------|--------------|-----------|--------------|-------------|
| <b>Desire for a new house from the government</b> |          |              |           |              |             |
| <b>1: Non Beneficiary</b>                         | <b>5</b> | <b>8</b>     | <b>22</b> |              | <b>35</b>   |
| Yes - Any kind                                    |          | 7            | 1         |              | 8           |
| Yes - in situ                                     | 5        |              | 16        |              | 21          |

| Desire/Reason for a new house        | Rural AP | Rural Odisha | Urban AP  | Urban Odisha | Grand Total |
|--------------------------------------|----------|--------------|-----------|--------------|-------------|
| Yes - relocation                     |          |              | 4         |              | 4           |
| No                                   |          | 1            | 1         |              | 2           |
| <b>2: In Situ Housing</b>            |          | <b>5</b>     |           |              | <b>5</b>    |
| Yes - Any kind                       |          | 5            |           |              | 5           |
| <b>3: Relocation in process</b>      |          | <b>15</b>    |           |              | <b>15</b>   |
| Yes - Any kind                       |          | 12           |           |              | 12          |
| Yes - relocation                     |          | 3            |           |              | 3           |
| <b>4: Relocated</b>                  |          | <b>9</b>     | <b>35</b> |              | <b>44</b>   |
| Yes - Any kind                       |          | 6            | 4         |              | 10          |
| Yes - in situ                        |          | 2            | 9         |              | 11          |
| Yes - relocation                     |          |              | 19        |              | 19          |
| No                                   |          | 1            | 3         |              | 4           |
| <b>5: Infrastructure Upgradation</b> |          |              |           | <b>20</b>    | <b>20</b>   |
| Yes - Any kind                       |          |              |           | 10           | 10          |
| Yes - in situ                        |          |              |           | 4            | 4           |
| No                                   |          |              |           | 6            | 6           |
| <b>6: Identified for relocation</b>  |          |              |           | <b>33</b>    | <b>33</b>   |
| Yes - Any kind                       |          |              |           | 16           | 16          |
| Yes - in situ                        |          |              |           | 14           | 14          |
| No                                   |          |              |           | 3            | 3           |
| <b>Grand Total</b>                   | <b>5</b> | <b>37</b>    | <b>57</b> | <b>53</b>    | <b>152</b>  |
| <b>Reasons for wanting a house</b>   |          |              |           |              |             |
| <b>1: Non Beneficiary</b>            | <b>3</b> | <b>5</b>     | <b>19</b> |              | <b>27</b>   |
| House not strong                     | 1        | 4            | 8         |              | 13          |
| Want patta and safe                  | 1        |              | 4         |              | 5           |
| Area not sufficient                  |          |              | 1         |              | 1           |
| Renting                              |          |              | 3         |              | 3           |
| Got but want in-situ                 | 1        |              | 3         |              | 4           |
| Should support work                  |          | 1            |           |              | 1           |
| <b>2: In Situ Housing</b>            |          | <b>4</b>     |           |              | <b>4</b>    |
| House not strong                     |          | 1            |           |              | 1           |
| Want patta and safe                  |          | 3            |           |              | 3           |
| <b>3: Relocation in process</b>      |          | <b>13</b>    |           |              | <b>13</b>   |
| House not strong                     |          | 13           |           |              | 13          |
| <b>4: Relocated</b>                  |          | <b>7</b>     | <b>22</b> |              | <b>29</b>   |
| House not strong                     |          | 1            | 1         |              | 2           |
| Want patta and safe                  |          | 1            | 7         |              | 8           |
| Area not sufficient                  |          | 1            |           |              | 1           |

| Desire/Reason for a new house             | Rural AP | Rural Odisha | Urban AP  | Urban Odisha | Grand Total |
|-------------------------------------------|----------|--------------|-----------|--------------|-------------|
| Renting                                   |          |              | 11        |              | 11          |
| Got but want in-situ                      |          | 2            |           |              | 2           |
| Should support work                       |          |              | 3         |              | 3           |
| Other services like toilets schools, etc. |          | 2            |           |              | 2           |
| <b>5: Infrastructure Upgradation</b>      |          |              |           | <b>16</b>    | <b>16</b>   |
| House not strong                          |          |              |           | 8            | 8           |
| Renting                                   |          |              |           | 4            | 4           |
| Got but want in-situ                      |          |              |           | 1            | 1           |
| Should support work                       |          |              |           | 3            | 3           |
| <b>6: Identified for relocation</b>       |          |              |           | <b>28</b>    | <b>28</b>   |
| House not strong                          |          |              |           | 5            | 5           |
| Want patta and safe                       |          |              |           | 3            | 3           |
| Area not sufficient                       |          |              |           | 2            | 2           |
| Renting                                   |          |              |           | 1            | 1           |
| Got but want in-situ                      |          |              |           | 12           | 12          |
| Should support work                       |          |              |           | 4            | 4           |
| Other services like toilets schools, etc. |          |              |           | 1            | 1           |
| <b>Grand Total</b>                        | <b>3</b> | <b>29</b>    | <b>41</b> | <b>44</b>    | <b>117</b>  |

### Prevalence of bank accounts by reasons of opening

According to a World Bank estimate, only 35 per cent of Indians above the age of 15 had bank accounts in 2011 (26.5% of females and 43% of males). By 2014 this number had increased to 53 per cent (43% of females and 62% of males). This was also the time when Cyclones Phailin and Hud-Hud hit the coastal states of Andhra Pradesh and Odisha. From primary surveys, 148 of 158 HHs responded that they had at least one bank

account. Many even had multiple accounts that they had to open due to various schemes which do not allow using existing accounts. For instance, the ODRP scheme would require transactions of more than Rs 10,000 which the zero balance account does not allow and so new accounts had to be opened. The Pradhan Mantri Jan Dhan Yojna (PMJDY)-linked zero balance accounts also have a fair penetration (41 of 145 respondents had bank accounts under this scheme). It was however noticed that most people despite having bank accounts were not using them for any purpose other than availing

| Prevalence of Bank Accounts  | Rural AP | Rural Odisha | Urban AP  | Urban Odisha | Grand Total |
|------------------------------|----------|--------------|-----------|--------------|-------------|
| <b>Yes</b>                   | <b>5</b> | <b>37</b>    | <b>55</b> | <b>48</b>    | <b>145</b>  |
| Zero Balance - PMJDY         | 1        | 2            | 24        | 14           | 41          |
| For compensation             | 1        | 9            | 4         | 9            | 23          |
| For receiving govt. benefits | 1        | 10           | 7         | 2            | 20          |
| For savings                  | 1        | 10           | 11        | 6            | 28          |
| For work                     | 1        | 1            | 5         | 3            | 10          |
| Others                       |          | 5            | 4         | 14           | 23          |
| <b>No</b>                    |          | <b>3</b>     | <b>3</b>  | <b>4</b>     | <b>10</b>   |
| <b>DKCS</b>                  |          |              |           | <b>3</b>     | <b>3</b>    |
| <b>Grand Total</b>           | <b>5</b> | <b>40</b>    | <b>58</b> | <b>55</b>    | <b>158</b>  |

these schemes. Only 10 of 145 HHs said they were using bank accounts for work-related transactions and 28 of 145, for savings.

This phenomenon can be studied further in the next phase of research, to see if households could use the bank accounts to reduce their exposure to risk, or to examine the ways in which access to credit is responsible for mitigating risks. In some instances, people said that they had inhibitions in putting money in these accounts as they did not trust them. Many also said that they did not save enough to put any money aside in the account and much of the savings were being consumed for everyday needs and health issues.

### People's stated priorities of risk management

This was asked as a proxy to the question 'What would they save for, if they could' (even if they didn't). Most people (63 HHs) mentioned health as a primary reason

for which they would save to mitigate their risks, followed by education (56 HHs). Only 36 mentioned future eventualities, which could include cyclones and rains but also any other everyday eventualities. 19 said they would save for their children's marriages, and 17 mentioned livelihood-related risks. 15 HHs also mentioned future repairs in the house as one of their motivations to save. This indicates that while most people consider health, education, livelihoods, etc., their future risks, not so many perceive cyclones and future eventualities as risks for which they may need to save. This may give an insight to policy makers who are working on reducing climate-related risks that people's current set of risks are different from what the former are trying to mitigate by providing housing and through other interventions. This is also an indication of a larger mistrust people have in what are meant to be public provisions and services (health, education, provision of livelihoods, etc.) and that they have taken it upon themselves to save for those rather than other private affairs like children's marriages

| Reasons they would save | Rural AP | Rural Odisha | Urban AP | Urban Odisha | Grand Total |
|-------------------------|----------|--------------|----------|--------------|-------------|
| Health                  |          | 13           | 35       | 15           | <b>63</b>   |
| Education               | 1        | 15           | 23       | 17           | <b>56</b>   |
| Future eventualities    | 1        | 4            | 24       | 7            | <b>36</b>   |
| Children's marriages    |          | 2            | 12       | 5            | <b>19</b>   |
| Livelihoods and work    |          | 2            | 13       | 2            | <b>17</b>   |
| House                   | 1        |              | 10       | 4            | <b>15</b>   |
| Other reasons           |          | 2            | 1        | 2            | <b>5</b>    |

| Priority                            | Frequency |
|-------------------------------------|-----------|
| Suitable Work Opportunity nearby    | 45        |
| House title                         | 35        |
| Health card and facilities          | 34        |
| Piped water & adequate water supply | 31        |
| School                              | 23        |
| Strong house                        | 18        |
| Access to Schemes for BPL, Old      | 15        |
| Education/Business Loan             | 12        |
| In-situ house                       | 11        |
| Access to markets                   | 8         |
| Roads and street lights             | 7         |
| Toilets/Bathroom for women          | 5         |
| Solid Waste management              | 5         |
| Drainage system                     | 5         |
| Work opportunities for women        | 4         |
| Food Security                       | 4         |

| Priority                                  | Frequency |
|-------------------------------------------|-----------|
| Gas                                       | 3         |
| Port                                      | 3         |
| Safety                                    | 3         |
| Cattle-shed                               | 2         |
| Affordable Transportation facilities      | 2         |
| Professional registration (fishing, etc.) | 2         |
| Treatment for alcohol abuse               | 2         |
| Anganwadi                                 | 1         |
| To stay together as family                | 1         |
| Old age home                              | 1         |
| Vegetation clearing                       | 1         |
| Electricity                               | 1         |
| Alcohol                                   | 1         |
| Migration                                 | 1         |
| Community participation                   | 1         |

and housing repairs.

When asked what they valued most—the precise question posed was ‘What were the three most important things for them’, people seemed to focus more on what they currently lacked but wanted in the future. Some of these were aspirations which they had the requisite skills and education for such as work opportunities nearby, title to a house, health facilities and insurance, piped water supply with adequate water, schools (many specified higher education and English medium), strong houses (safe against rains and cyclones), access to government schemes, loans for business and education, and in-situ houses. There were others, albeit in smaller numbers, that gave a sense of the current needs of the people, for instance one person also said ‘alcohol’ as a top priority—which aligns with the rampant alcoholism in many of the sites visited. Breaking this down by rural and urban site and by type of beneficiary could give us some sense of the needs of the people and site-specific interventions to address them.

### Government assistance and IDs

Of the 158 HHs surveyed, about 93 said that they were receiving some kind of assistance from government schemes or programmes. Only 76 said they had voter IDs, 75 had Adhaar Cards, and only 47 said they had BPL cards (while many more appear to have been eligible). This data is patchy since not all households

responded to this question, but it needs to be studied in depth to understand whether having such IDs has an implication on their beneficiary eligibility. And if there are people who are eligible but do not have access to any compensation or scheme, what is the burden that is being created in the process?

### Stated health issues

Apart from common cold and fever, nearly 35 HHs out of 141 complained of various water- and vector-borne diseases, particularly typhoid, diarrhoea, malaria, etc. Many of the relocated people, particularly in Urban Andhra Pradesh, stressed on increased incidence of water- and vector-borne diseases in the new locations due to improper environmental service provisions. People here also complained about various kinds of infections caused by polluted water, air or soil conditions. But many also mentioned the prevalence of what are popularly known as ‘rich-people diseases’—such as blood pressure, diabetes, cholesterol, etc. There was also a mention of veterinary problems and the lack of suitable and approximate veterinary hospitals. Women mentioned several OB/GYN issues that they face, and that they often found it difficult to reach the nearest hospitals on their own. Some mentioned that they took the help of their neighbours in such instances.

Average distances to the nearest health facilities (or those that they visited) as stated by the people was

| Govt. assistance & IDs                              | Rural AP | Rural Odisha | Urban AP  | Urban Odisha | Grand Total |
|-----------------------------------------------------|----------|--------------|-----------|--------------|-------------|
| Voter ID                                            | 3        | 14           | 40        | 19           | 76          |
| Adhaar Card                                         | 3        | 11           | 41        | 20           | 75          |
| BPL Card                                            | 2        | 6            | 28        | 11           | 47          |
| APL Card                                            |          | 1            | 4         | 2            | 7           |
| Old Age Pension                                     |          | 9            | 15        | 16           | 40          |
| Old Age Pension NA                                  | 2        |              | 20        |              | 22          |
| Widow Pension                                       |          | 2            | 3         | 2            | 7           |
| Widow Pension NA                                    | 2        |              | 28        | 1            | 31          |
| Maternity Benefits                                  |          | 8            | 3         | 6            | 17          |
| Maternity Benefits NA                               | 2        |              | 29        | 1            | 32          |
| Health card                                         |          | 6            | 1         | 3            | 10          |
| White Ration card                                   |          |              | 2         |              | 2           |
| Applied for self-employed women loan but didn't get |          |              | 1         |              | 1           |
| Insurance Scheme                                    |          |              |           | 1            | 1           |
| Polio Vaccination                                   |          |              | 1         |              | 1           |
| <b>Households availing some government scheme</b>   | <b>3</b> | <b>27</b>    | <b>22</b> | <b>44</b>    | <b>93</b>   |



| Stated health issues                                                 |                    |                    |                          |              |                               |                              |             |
|----------------------------------------------------------------------|--------------------|--------------------|--------------------------|--------------|-------------------------------|------------------------------|-------------|
| Regular health problems as stated by households                      | 1: Non Beneficiary | 2: In Situ Housing | 3: Relocation in process | 4: Relocated | 5: Infrastructure Upgradation | 6: Identified for relocation | Grand Total |
| Regular cold and fever                                               | 15                 | 7                  | 4                        | 20           | 3                             | 11                           | 60          |
| Water and Vector borne                                               | 3                  |                    | 1                        | 6            | 2                             | 4                            | 16          |
| Vector borne diseases                                                | 5                  | 1                  | 1                        | 3            | 2                             | 2                            | 14          |
| Water borne diseases                                                 | 1                  |                    | 1                        |              | 1                             | 2                            | 5           |
| BP, Diabetes, Gastric, Asthma, Cancer, Cardiovascular problems       | 3                  |                    | 3                        | 3            | 2                             | 3                            | 14          |
| Body Pains and Arthristis                                            | 5                  |                    | 1                        | 1            | 2                             |                              | 9           |
| Paralysis or physical handicap                                       | 1                  |                    | 1                        | 1            |                               | 1                            | 4           |
| Infections (skin, eye, ear, etc.)                                    |                    |                    |                          | 1            |                               | 1                            | 2           |
| Professional Hazards                                                 | 1                  |                    |                          | 1            |                               |                              | 2           |
| Lack of treatment facilities                                         |                    |                    |                          |              |                               | 1                            | 1           |
| OB/GYN problems                                                      |                    |                    |                          | 1            |                               |                              | 1           |
| Veterinary problems                                                  |                    |                    |                          |              | 1                             |                              | 1           |
| Many of the above                                                    |                    |                    |                          | 1            | 1                             |                              | 2           |
| None                                                                 | 1                  |                    |                          | 2            | 2                             | 5                            | 10          |
| <b>Grand Total</b>                                                   | <b>35</b>          | <b>8</b>           | <b>12</b>                | <b>40</b>    | <b>16</b>                     | <b>30</b>                    | <b>141</b>  |
|                                                                      |                    |                    |                          |              |                               |                              |             |
| Average distance of health facility from current sites of habitation | < 1 km             |                    | 1 - 5 km                 |              | > 5 km                        |                              | Grand Total |
| 1: Non Beneficiary                                                   | 11                 |                    | 14                       |              | 12                            |                              | 37          |
| 2: In Situ Housing                                                   | 1                  |                    | 2                        |              | 5                             |                              | 8           |
| 3: Relocation in process                                             | 3                  |                    | 1                        |              | 11                            |                              | 15          |
| 4: Relocated                                                         | 1                  |                    | 22                       |              | 19                            |                              | 42          |
| 5: Infrastructure Upgradation                                        | 2                  |                    | 15                       |              |                               |                              | 17          |
| 6: Identified for relocation                                         | 10                 |                    | 18                       |              |                               |                              | 28          |
| <b>Grand Total</b>                                                   | <b>28</b>          |                    | <b>72</b>                |              | <b>47</b>                     |                              | <b>147</b>  |

predominantly less than 5 km, but about 19 HHs from the relocated types of respondents said that they had to travel more than 5 km (in many cases more than 20 km) to reach the nearest hospitals.

### Disability

Of the random sample of 158 HHs, 14 had family members who were differently-abled. Of these, only 7 mentioned they received any government support or housing

allocation (50% of the sample).

### Insurance

40 out of 156 respondents said that they had some form of life insurance or the other. 38 out of 150 said they had LIC policies, and 5 out of 150 said that they had recently bought the Pradhan Mantri Bima Yojna (although most of them did not know how to operate it, and if they did not use their zero balance bank accounts on a regular

basis they would not be entitled to the insurance either). While there is still some penetration of life insurance in these parts, non-life insurance products are non-existent. It was learnt that ODRP beneficiaries are entitled to a non-life multi-hazard insurance. But none of the beneficiaries mentioned this themselves probably due to lack of awareness. This could be because the insurance

plan is still in process and people may be informed in the future. But it might be a policy dilemma whether to let people know about their entitlement to this multi-hazard house insurance as making them aware could lead to 'moral hazards' on the part of beneficiaries, while not letting them know may lead to ineffective service delivery.

| Insurance                                            | No         | Yes       | Grand Total |
|------------------------------------------------------|------------|-----------|-------------|
| <b>Prevalence of life insurance</b>                  |            |           |             |
| 1: Non Beneficiary                                   | 30         | 7         | 37          |
| 2: In Situ Housing                                   | 8          |           | 8           |
| 3: Relocation in process                             | 14         | 1         | 15          |
| 4: Relocated                                         | 31         | 12        | 43          |
| 5: Infrastructure Upgradation                        | 10         | 9         | 19          |
| 6: Identified for relocation                         | 23         | 11        | 34          |
| <b>Grand Total</b>                                   | <b>116</b> | <b>40</b> | <b>156</b>  |
| <b>Prevalence of LIC</b>                             |            |           |             |
| 1: Non Beneficiary                                   | 27         | 6         | 33          |
| 2: In Situ Housing                                   | 7          |           | 7           |
| 3: Relocation in process                             | 14         | 1         | 15          |
| 4: Relocated                                         | 32         | 10        | 42          |
| 5: Infrastructure Upgradation                        | 10         | 9         | 19          |
| 6: Identified for relocation                         | 22         | 12        | 34          |
| <b>Grand Total</b>                                   | <b>112</b> | <b>38</b> | <b>150</b>  |
| <b>Prevalence of PMBY</b>                            |            |           |             |
| 1: Non Beneficiary                                   | 31         | 2         | 33          |
| 2: In Situ Housing                                   | 7          |           | 7           |
| 3: Relocation in process                             | 15         |           | 15          |
| 4: Relocated                                         | 39         | 3         | 42          |
| 5: Infrastructure Upgradation                        | 19         |           | 19          |
| 6: Identified for relocation                         | 34         |           | 34          |
| <b>Grand Total</b>                                   | <b>145</b> | <b>5</b>  | <b>150</b>  |
| <b>Prevalence of non-life multi hazard insurance</b> |            |           |             |
| 1: Non Beneficiary                                   | 33         |           | 33          |
| 2: In Situ Housing                                   | 3          | 5         | 8           |
| 3: Relocation in process                             |            | 15        | 15          |
| 4: Relocated                                         | 32         | 11        | 43          |
| 5: Infrastructure Upgradation                        | 10         |           | 10          |
| 6: Identified for relocation                         | 23         |           | 23          |
| <b>Grand Total</b>                                   | <b>101</b> | <b>31</b> | <b>132</b>  |

| Health Card Prevalence by beneficiary type | No        | Yes       | Grand Total |
|--------------------------------------------|-----------|-----------|-------------|
| 1: Non Beneficiary                         | 18        | 18        | 36          |
| 2: In Situ Housing                         | 5         | 3         | 8           |
| 3: Relocation in process                   | 4         | 11        | 15          |
| 4: Relocated                               | 20        | 22        | 42          |
| 5: Infrastructure Upgradation              | 14        | 5         | 19          |
| 6: Identified for relocation               | 26        | 7         | 33          |
| <b>Grand Total</b>                         | <b>87</b> | <b>66</b> | <b>153</b>  |

  

|                                           | Rural AP | Rural Odisha | Urban AP | Urban Odisha | Grand Total |
|-------------------------------------------|----------|--------------|----------|--------------|-------------|
| Health Card Prevalence by rural and urban | 2        | 22           | 30       | 12           | 66          |
| Use of the health card                    |          | 3            | 10       | 1            | 14          |

### Health insurance

Of 153 HHs who responded to the question, 66 said they had the health card (National Health Insurance Scheme Rashtriya Swasthya Bima Yojana) covering their immediate family, but of these 66 only 14 said that they had ever been able to use it (10 of whom were in Urban AP) since it covers only major medical treatments and emergencies.

### Other shocks faced in the household

Many families mentioned several shocks they had faced recently that had affected them often more than the cy-

clone itself. In the 105 responses received, many stated lack of livelihood options and loss of jobs (10 responses), monkey menace (predominantly by horticulturists among the Devi Nagar-Lakshimpur-Ramayapalli residents), extreme health issues and deaths in the family (11 responses), women-headed household problems (4 responses), relocation itself (4 responses), and evictions (2 responses), etc. It is possible that there are certain biases in the responses depending on the way they were interviewed and what state in their life they were. But this information was collected to get a sense of the major perceived problems and risks that may have affected them even more than a cyclone and which they had the least capacities to deal with.

| Types of shocks faced by families                     | Rural AP | Rural Odisha | Urban AP | Urban Odisha | Grand Total |
|-------------------------------------------------------|----------|--------------|----------|--------------|-------------|
| Lack of livelihood options and safety nets            |          | 3            | 3        | 4            | 10          |
| Monkey Menace                                         |          | 8            |          |              | 8           |
| Health issues                                         |          | 3            | 3        | 2            | 8           |
| Financial loans and high interest rates               | 1        | 1            | 4        | 1            | 7           |
| Women headed household                                |          |              | 3        | 1            | 4           |
| Relocation                                            |          | 2            | 2        |              | 4           |
| Multiple shocks                                       |          | 1            | 1        | 2            | 4           |
| Weak house (rains, etc.)                              |          |              |          | 3            | 3           |
| Deaths in family                                      |          |              | 2        | 1            | 3           |
| Cyclone related damages and lack of sufficient relief | 1        | 1            | 1        |              | 3           |
| Alcoholism                                            |          |              | 3        |              | 3           |
| Accidents and fires                                   |          | 2            | 1        |              | 3           |
| Sold land                                             |          | 1            |          |              | 1           |

| Types of shocks faced by families                | Rural AP | Rural Odisha | Urban AP  | Urban Odisha | Grand Total |
|--------------------------------------------------|----------|--------------|-----------|--------------|-------------|
| Migration                                        |          | 1            |           |              | 1           |
| Locational problems (sea shore, etc.)            |          |              | 1         |              | 1           |
| Lack of fishing activity / food produce / cattle |          |              |           | 1            | 1           |
| Lack of fishing activity / food produce          |          |              | 1         |              | 1           |
| Lack of BPL card / Ration card                   |          |              | 1         | 1            | 2           |
| Evictions                                        |          |              | 2         |              | 2           |
| None                                             | 2        | 3            | 27        | 4            | 36          |
| <b>Grand Total</b>                               | <b>4</b> | <b>26</b>    | <b>55</b> | <b>20</b>    | <b>105</b>  |

## Primary survey findings of Post Cyclone Effects

### Primary survey findings related to post-cyclone effects

Following are findings related to the effects of recent cyclones in 2013 (Odisha) and 2014 (AP):

#### Early warning about the cyclones

Only 15 out of 158 HHs said that they did not know about the cyclone in advance, and most of these (14 out of 15) were from urban Andhra Pradesh. The various sources of information people said they had access to included TV and radio (73 out of 142 respondents), government announcements (51 out of 142) and neighbours and relatives (17 out of 142—which also indicates that people still believe what they hear from others, which can sometimes be a boon but also a burden.)

### Losses faced during the recent cyclones

House damage is often used as an eligibility criteria for any compensations or beneficiary identification. This question was asked to know from people what their perceptions of damages were, and whether or not the assessors had noted the same. In most cases these were observed first-hand and noted and not limited to stated damages. Of the non-beneficiaries (35 respondents), 26 said they had partial-to-completely damaged houses after the recent cyclones; 19 of these were from AP. Of those identified for infrastructure upgradation (type 5), none had severe or complete damages. Of the relocated (37 respondents), 17 said their previous houses were damaged, and 12 (from urban AP) said their houses did not exist anymore after the evictions so there were no damages during the recent cyclone.

| Warning about the cyclone                                                                                                                                                                                                                               | Rural AP | Rural Odisha | Urban AP  | Urban Odisha | Grand Total |
|---------------------------------------------------------------------------------------------------------------------------------------------------------------------------------------------------------------------------------------------------------|----------|--------------|-----------|--------------|-------------|
| <b>Advance information about cyclone</b>                                                                                                                                                                                                                |          |              |           |              |             |
| No                                                                                                                                                                                                                                                      |          | 1            | 14        |              | 15          |
| Yes                                                                                                                                                                                                                                                     | 5        | 39           | 44        | 55           | 143         |
| <b>Grand Total</b>                                                                                                                                                                                                                                      | <b>5</b> | <b>40</b>    | <b>58</b> | <b>55</b>    | <b>158</b>  |
| <b>Sources of information for early warning</b>                                                                                                                                                                                                         |          |              |           |              |             |
| TV/ Radio                                                                                                                                                                                                                                               | 1        | 15           | 20        | 37           | 73          |
| Government Announcement                                                                                                                                                                                                                                 | 4        | 16           | 19        | 12           | 51          |
| Neighbors/Relatives                                                                                                                                                                                                                                     |          | 7            | 6         | 4            | 17          |
| Others                                                                                                                                                                                                                                                  |          |              | 1         |              | 1           |
| <b>Grand Total</b>                                                                                                                                                                                                                                      | <b>5</b> | <b>38</b>    | <b>46</b> | <b>53</b>    | <b>142</b>  |
| Note: These are responses for their current residences in the recent cyclones, which for relocated could mean those who were already living in relocated sites (particularly those in Urban AP) at the time of the cyclones and effects on these sites. |          |              |           |              |             |

| Losses faced in Cyclone                    | Rural AP | Rural Odisha | Urban AP  | Urban Odisha | Grand Total |
|--------------------------------------------|----------|--------------|-----------|--------------|-------------|
| <b>House damage by type of beneficiary</b> |          |              |           |              |             |
| <b>1: Non Beneficiary</b>                  | <b>5</b> | <b>8</b>     | <b>22</b> |              | <b>35</b>   |
| Complete Damage                            | 3        |              | 13        |              | 16          |
| Partial Damage                             |          | 7            | 3         |              | 10          |
| No Damage                                  | 2        | 1            | 6         |              | 9           |
| <b>2: In Situ Housing</b>                  |          | <b>4</b>     |           |              | <b>4</b>    |
| Partial Damage                             |          | 4            |           |              | 4           |
| <b>3: Relocation in process</b>            |          | <b>8</b>     |           |              | <b>8</b>    |
| Partial Damage                             |          | 7            |           |              | 7           |
| No Damage                                  |          | 1            |           |              | 1           |
| <b>4: Relocated</b>                        |          | <b>11</b>    | <b>36</b> |              | <b>47</b>   |
| Partial Damage                             |          | 1            | 9         |              | 10          |
| No Damage                                  |          | 10           | 27        |              | 37          |
| <b>5: Infrastructure Upgradation</b>       |          |              |           | <b>15</b>    | <b>15</b>   |
| Partial Damage                             |          |              |           | 13           | 13          |
| No Damage                                  |          |              |           | 2            | 2           |
| <b>6: Identified for relocation</b>        |          |              |           | <b>28</b>    | <b>28</b>   |
| Partial Damage                             |          |              |           | 27           | 27          |
| No Damage                                  |          |              |           | 1            | 1           |
| <b>Grand Total</b>                         | <b>5</b> | <b>31</b>    | <b>58</b> | <b>43</b>    | <b>137</b>  |
| <b>Roof Damage</b>                         |          |              |           |              |             |
| <b>1: Non Beneficiary</b>                  | <b>5</b> | <b>9</b>     | <b>22</b> |              | <b>36</b>   |
| Complete Damage                            | 5        | 1            | 14        |              | 20          |
| Partial Damage                             |          | 6            | 2         |              | 8           |
| No Damage                                  |          | 2            | 6         |              | 8           |
| <b>2: In Situ Housing</b>                  |          | <b>5</b>     |           |              | <b>5</b>    |
| Complete Damage                            |          | 5            |           |              | 5           |
| <b>3: Relocation in process</b>            |          | <b>15</b>    |           |              | <b>15</b>   |
| Complete Damage                            |          | 14           |           |              | 14          |
| No Damage                                  |          | 1            |           |              | 1           |
| <b>4: Relocated</b>                        |          | <b>11</b>    | <b>36</b> |              | <b>47</b>   |
| Partial Damage                             |          | 1            | 7         |              | 8           |
| No Damage                                  |          | 10           | 29        |              | 39          |
| <b>5: Infrastructure Upgradation</b>       |          |              |           | <b>19</b>    | <b>19</b>   |
| Complete Damage                            |          |              |           | 9            | 9           |
| Partial Damage                             |          |              |           | 7            | 7           |
| No Damage                                  |          |              |           | 3            | 3           |



| Losses faced in Cyclone                                                                                                                                                | Rural AP | Rural Odisha | Urban AP  | Urban Odisha | Grand Total |
|------------------------------------------------------------------------------------------------------------------------------------------------------------------------|----------|--------------|-----------|--------------|-------------|
| <b>6: Identified for relocation</b>                                                                                                                                    |          |              |           | <b>35</b>    | <b>35</b>   |
| Complete Damage                                                                                                                                                        |          |              |           | 21           | 21          |
| Partial Damage                                                                                                                                                         |          |              |           | 12           | 12          |
| No Damage                                                                                                                                                              |          |              |           | 2            | 2           |
| <b>Grand Total</b>                                                                                                                                                     | <b>5</b> | <b>40</b>    | <b>58</b> | <b>54</b>    | <b>157</b>  |
| <b>Wall Damages</b>                                                                                                                                                    |          |              |           |              |             |
| <b>1: Non Beneficiary</b>                                                                                                                                              | <b>5</b> | <b>9</b>     | <b>22</b> |              | <b>36</b>   |
| Complete Damage                                                                                                                                                        | 3        | 1            | 11        |              | 15          |
| Partial Damage                                                                                                                                                         | 2        | 7            | 5         |              | 14          |
| No Damage                                                                                                                                                              |          | 1            | 6         |              | 7           |
| <b>2: In Situ Housing</b>                                                                                                                                              |          | <b>5</b>     |           |              | <b>5</b>    |
| Complete Damage                                                                                                                                                        |          | 1            |           |              | 1           |
| No Damage                                                                                                                                                              |          | 4            |           |              | 4           |
| <b>3: Relocation in process</b>                                                                                                                                        |          | <b>15</b>    |           |              | <b>15</b>   |
| Complete Damage                                                                                                                                                        |          | 9            |           |              | 9           |
| Partial Damage                                                                                                                                                         |          | 1            |           |              | 1           |
| No Damage                                                                                                                                                              |          | 5            |           |              | 5           |
| <b>4: Relocated</b>                                                                                                                                                    |          | <b>11</b>    | <b>36</b> |              | <b>47</b>   |
| Partial Damage                                                                                                                                                         |          | 1            | 3         |              | 4           |
| No Damage                                                                                                                                                              |          | 10           | 33        |              | 43          |
| <b>5: Infrastructure Upgradation</b>                                                                                                                                   |          |              |           | <b>19</b>    | <b>19</b>   |
| Complete Damage                                                                                                                                                        |          |              |           | 4            | 4           |
| Partial Damage                                                                                                                                                         |          |              |           | 9            | 9           |
| No Damage                                                                                                                                                              |          |              |           | 6            | 6           |
| <b>6: Identified for relocation</b>                                                                                                                                    |          |              |           | <b>35</b>    | <b>35</b>   |
| Complete Damage                                                                                                                                                        |          |              |           | 7            | 7           |
| Partial Damage                                                                                                                                                         |          |              |           | 16           | 16          |
| No Damage                                                                                                                                                              |          |              |           | 12           | 12          |
| <b>Grand Total</b>                                                                                                                                                     | <b>5</b> | <b>40</b>    | <b>58</b> | <b>54</b>    | <b>157</b>  |
| <b>Of the relocated, damages to their previous sites of habitation</b>                                                                                                 |          |              |           |              |             |
| <b>4: Relocated</b>                                                                                                                                                    |          | <b>10</b>    | <b>27</b> |              | <b>37</b>   |
| Yes                                                                                                                                                                    |          | 10           | 7         |              | 17          |
| No                                                                                                                                                                     |          |              | 8         |              | 8           |
| NA                                                                                                                                                                     |          |              | 12        |              | 12          |
| Note: The Not applicable ones are those where the previous sites do not exist anymore as housing, and have either been reused as some other land use, or lying vacant. |          |              |           |              |             |

## Compensations

Of the 158 HHs surveyed, 131 said that they received some form of compensation or relief from either the state government or other non-governmental agencies. Of the 156 who offered details of these compensations, 143 had received standard packages that were being offered to everyone irrespective of whether they had suffered damages or not (in the case of Odisha, this was Rs 500 and 50 kg rice per family). Of those who did not (43 HH), 25 were already relocated. One of the reasons mentioned by households was that since they lived far away, no one came to ask how they were doing after

the cyclone. This was unlike what their experiences had been when staying within the city.

119 out of 138 responders said that they received other in-kind aid including tarpaulin, solar lights, etc. 55 out of 133 also said that they received additional money based on damage assessments by assessors. But the emerging observation from here is that while people have received relief after extreme shocks, they are not getting much support after everyday shocks. Does universal compensation have a merit over that provided after assessments and follow-ups?

| Compensations                                                                                            | No        | Yes        | Grand Total |
|----------------------------------------------------------------------------------------------------------|-----------|------------|-------------|
| <b>Households who received any govt. or private relief after the recent cyclones by Beneficiary Type</b> |           |            |             |
| <b>1: Non Beneficiary</b>                                                                                | <b>7</b>  | <b>30</b>  | <b>37</b>   |
| ASR Nagar                                                                                                | 1         | 7          | 8           |
| Devi Nagar / Ramayapalli / Lakshminagar                                                                  |           | 6          | 6           |
| Jalari Peta                                                                                              | 3         | 7          | 10          |
| Markundi                                                                                                 |           | 3          | 3           |
| Pudimadaka                                                                                               |           | 5          | 5           |
| Sevanagar                                                                                                | 1         | 2          | 3           |
| Sonia Gandhi Nagar                                                                                       | 1         |            | 1           |
| Vambay Colony                                                                                            | 1         |            | 1           |
| <b>2: In Situ Housing</b>                                                                                |           | <b>8</b>   | <b>8</b>    |
| Devi Nagar / Ramayapalli / Lakshminagar                                                                  |           | 5          | 5           |
| Sonia Gandhi Nagar                                                                                       |           | 3          | 3           |
| <b>3: Relocation in process</b>                                                                          |           | <b>15</b>  | <b>15</b>   |
| Markundi                                                                                                 |           | 15         | 15          |
| <b>4: Relocated</b>                                                                                      | <b>13</b> | <b>30</b>  | <b>43</b>   |
| Devi Nagar / Ramayapalli / Lakshminagar                                                                  |           | 11         | 11          |
| Paradesipallyam                                                                                          | 6         | 6          | 12          |
| Sevanagar                                                                                                | 4         | 9          | 13          |
| Vambay Colony                                                                                            | 3         | 4          | 7           |
| <b>5: Infrastructure Upgradation</b>                                                                     | <b>1</b>  | <b>19</b>  | <b>20</b>   |
| Canal Street                                                                                             | 1         | 19         | 20          |
| <b>6: Identified for relocation</b>                                                                      | <b>6</b>  | <b>29</b>  | <b>35</b>   |
| Bada Harijan Sahi                                                                                        | 2         | 8          | 10          |
| Khaja Sahi                                                                                               |           | 5          | 5           |
| Pichipicha Nagar                                                                                         |           | 5          | 5           |
| Ramnagar Odiya Sahi                                                                                      | 4         | 11         | 15          |
| <b>Grand Total</b>                                                                                       | <b>27</b> | <b>131</b> | <b>158</b>  |

| Compensations                                   | No        | Yes        | Grand Total |
|-------------------------------------------------|-----------|------------|-------------|
| <b>Standard Universal Compensation Packages</b> |           |            |             |
| <b>1: Non Beneficiary</b>                       | <b>14</b> | <b>22</b>  | <b>36</b>   |
| ASR Nagar                                       | 5         | 3          | 8           |
| Devi Nagar / Ramayapalli / Lakshminagar         |           | 5          | 5           |
| Jalari Peta                                     | 5         | 5          | 10          |
| Markundi                                        |           | 3          | 3           |
| Pudimadaka                                      | 1         | 4          | 5           |
| Sevanagar                                       | 1         | 2          | 3           |
| Sonia Gandhi Nagar                              | 1         |            | 1           |
| Vambay Colony                                   | 1         |            | 1           |
| <b>2: In Situ Housing</b>                       | <b>2</b>  | <b>6</b>   | <b>8</b>    |
| Devi Nagar / Ramayapalli / Lakshminagar         |           | 5          | 5           |
| Sonia Gandhi Nagar                              | 2         | 1          | 3           |
| <b>3: Relocation in process</b>                 |           | <b>15</b>  | <b>15</b>   |
| Markundi                                        |           | 15         | 15          |
| <b>4: Relocated</b>                             | <b>25</b> | <b>18</b>  | <b>43</b>   |
| Devi Nagar / Ramayapalli / Lakshminagar         |           | 11         | 11          |
| Paradesipallyam                                 | 9         | 3          | 12          |
| Sevanagar                                       | 12        | 1          | 13          |
| Vambay Colony                                   | 4         | 3          | 7           |
| <b>5: Infrastructure Upgradation</b>            |           | <b>20</b>  | <b>20</b>   |
| Canal Street                                    |           | 20         | 20          |
| <b>6: Identified for relocation</b>             | <b>2</b>  | <b>32</b>  | <b>34</b>   |
| Bada Harijan Sahi                               |           | 10         | 10          |
| Khaja Sahi                                      |           | 5          | 5           |
| Pichipicha Nagar                                |           | 5          | 5           |
| Ramnagar Odiya Sahi                             | 2         | 12         | 14          |
| <b>Grand Total</b>                              | <b>43</b> | <b>113</b> | <b>156</b>  |
| <b>In kind (Tarpaulin, lights, etc.)</b>        |           |            |             |
| <b>1: Non Beneficiary</b>                       | <b>10</b> | <b>21</b>  | <b>31</b>   |
| ASR Nagar                                       | 2         | 6          | 8           |
| Devi Nagar / Ramayapalli / Lakshminagar         |           | 4          | 4           |
| Jalari Peta                                     | 6         | 3          | 9           |
| Markundi                                        |           | 3          | 3           |
| Pudimadaka                                      | 1         | 4          | 5           |
| Sevanagar                                       | 1         | 1          | 2           |
| <b>2: In Situ Housing</b>                       |           | <b>7</b>   | <b>7</b>    |
| Devi Nagar / Ramayapalli / Lakshminagar         |           | 5          | 5           |

| Compensations                           | No        | Yes        | Grand Total |
|-----------------------------------------|-----------|------------|-------------|
| Sonia Gandhi Nagar                      |           | 2          | 2           |
| <b>3: Relocation in process</b>         |           | <b>15</b>  | <b>15</b>   |
| Markundi                                |           | 15         | 15          |
| <b>4: Relocated</b>                     | <b>7</b>  | <b>26</b>  | <b>33</b>   |
| Devi Nagar / Ramayapalli / Lakshminagar |           | 11         | 11          |
| Paradesipallyam                         | 2         | 5          | 7           |
| Sevanagar                               |           | 9          | 9           |
| Vambay Colony                           | 5         | 1          | 6           |
| <b>5: Infrastructure Upgradation</b>    |           | <b>19</b>  | <b>19</b>   |
| Canal Street                            |           | 19         | 19          |
| <b>6: Identified for relocation</b>     | <b>2</b>  | <b>31</b>  | <b>33</b>   |
| Bada Harijan Sahi                       |           | 9          | 9           |
| Khaja Sahi                              |           | 5          | 5           |
| Pichipicha Nagar                        |           | 5          | 5           |
| Ramnagar Odiya Sahi                     | 2         | 12         | 14          |
| <b>Grand Total</b>                      | <b>19</b> | <b>119</b> | <b>138</b>  |
| <b>Additional money for damages</b>     |           |            |             |
| <b>1: Non Beneficiary</b>               | <b>22</b> | <b>5</b>   | <b>27</b>   |
| ASR Nagar                               | 8         |            | 8           |
| Devi Nagar / Ramayapalli / Lakshminagar | 4         |            | 4           |
| Jalari Peta                             | 5         | 3          | 8           |
| Markundi                                | 1         | 2          | 3           |
| Pudimadaka                              | 3         |            | 3           |
| Sevanagar                               | 1         |            | 1           |
| <b>2: In Situ Housing</b>               | <b>3</b>  | <b>4</b>   | <b>7</b>    |
| Devi Nagar / Ramayapalli / Lakshminagar | 1         | 4          | 5           |
| Sonia Gandhi Nagar                      | 2         |            | 2           |
| <b>3: Relocation in process</b>         |           | <b>15</b>  | <b>15</b>   |
| Markundi                                |           | 15         | 15          |
| <b>4: Relocated</b>                     | <b>24</b> | <b>9</b>   | <b>33</b>   |
| Devi Nagar / Ramayapalli / Lakshminagar | 4         | 7          | 11          |
| Paradesipallyam                         | 7         |            | 7           |
| Sevanagar                               | 9         |            | 9           |
| Vambay Colony                           | 4         | 2          | 6           |
| <b>5: Infrastructure Upgradation</b>    | <b>5</b>  | <b>14</b>  | <b>19</b>   |
| Canal Street                            | 5         | 14         | 19          |
| <b>6: Identified for relocation</b>     | <b>24</b> | <b>8</b>   | <b>32</b>   |
| Bada Harijan Sahi                       | 9         |            | 9           |

| Compensations                           | No                      | Yes                                                   | Grand Total            |             |
|-----------------------------------------|-------------------------|-------------------------------------------------------|------------------------|-------------|
| Khaja Sahi                              | 2                       | 3                                                     | 5                      |             |
| Pichipicha Nagar                        | 2                       | 2                                                     | 4                      |             |
| Ramnagar Odiya Sahi                     | 11                      | 3                                                     | 14                     |             |
| <b>Grand Total</b>                      | <b>78</b>               | <b>55</b>                                             | <b>133</b>             |             |
| Eligibility for compensation            | After Damage assessment | After pursuing /submitting documents/ special request | Universal compensation | Grand Total |
| <b>1: Non Beneficiary</b>               | <b>12</b>               | <b>1</b>                                              | <b>13</b>              | <b>26</b>   |
| ASR Nagar                               | 4                       |                                                       | 2                      | 6           |
| Devi Nagar / Ramayapalli / Lakshminagar |                         |                                                       | 3                      | 3           |
| Jalari Peta                             | 4                       | 1                                                     | 2                      | 7           |
| Markundi                                | 2                       |                                                       | 1                      | 3           |
| Pudimadaka                              | 2                       |                                                       | 3                      | 5           |
| Sevanagar                               |                         |                                                       | 2                      | 2           |
| <b>2: In Situ Housing</b>               | <b>4</b>                |                                                       | <b>3</b>               | <b>7</b>    |
| Devi Nagar / Ramayapalli / Lakshminagar | 4                       |                                                       | 1                      | 5           |
| Sonia Gandhi Nagar                      |                         |                                                       | 2                      | 2           |
| <b>3: Relocation in process</b>         | <b>15</b>               |                                                       |                        | <b>15</b>   |
| Markundi                                | 15                      |                                                       |                        | 15          |
| <b>4: Relocated</b>                     | <b>11</b>               |                                                       | <b>16</b>              | <b>27</b>   |
| Devi Nagar / Ramayapalli / Lakshminagar | 9                       |                                                       | 2                      | 11          |
| Paradesipallyam                         |                         |                                                       | 6                      | 6           |
| Sevanagar                               |                         |                                                       | 7                      | 7           |
| Vambay Colony                           | 2                       |                                                       | 1                      | 3           |
| <b>5: Infrastructure Upgradation</b>    | <b>13</b>               | <b>2</b>                                              | <b>4</b>               | <b>19</b>   |
| Canal Street                            | 13                      | 2                                                     | 4                      | 19          |
| <b>6: Identified for relocation</b>     | <b>12</b>               |                                                       | <b>15</b>              | <b>27</b>   |
| Bada Harijan Sahi                       | 2                       |                                                       | 4                      | 6           |
| Khaja Sahi                              | 3                       |                                                       | 2                      | 5           |
| Pichipicha Nagar                        | 4                       |                                                       | 1                      | 5           |
| Ramnagar Odiya Sahi                     | 3                       |                                                       | 8                      | 11          |
| <b>Grand Total</b>                      | <b>67</b>               | <b>3</b>                                              | <b>51</b>              | <b>121</b>  |

### Problems with services (water, sanitation, electricity, education, transport)

129 HHs said they faced drinking water challenges after the recent cyclones including 30 who were already living in relocated sites in urban AP. 92 mentioned that they faced problems related to defecation, either because open defecation was difficult or because they were

forced to defecate in the open because there was no water to service their existing toilets.

68 HHs said that they faced problems with electricity<sup>1</sup>.

<sup>1</sup> This question was added later, and 88 respondents were not asked this question. All those who were asked said that they had electricity problems for a few days

119 HHs said they had problems accessing schools right after the event, and gave reasons including loss of books and damaged school buildings especially after being used as emergency shelters. 54 said that

they faced problems with transportation, and some of the reasons included trees having fallen on streets and roads being blocked.

| Problems with Services after recent cyclone           | Rural AP | Rural Odisha | Urban AP  | Urban Odisha | Grand Total |
|-------------------------------------------------------|----------|--------------|-----------|--------------|-------------|
| <b>Households with drinking water problems</b>        |          |              |           |              |             |
| 1: Non Beneficiary                                    | 5        | 7            | 21        |              | 33          |
| 2: In Situ Housing                                    |          | 2            |           |              | 2           |
| 3: Relocation in process                              |          | 10           |           |              | 10          |
| 4: Relocated                                          |          | 10           | 30        |              | 40          |
| 5: Infrastructure Upgradation                         |          |              |           | 14           | 14          |
| 6: Identified for relocation                          |          |              |           | 30           | 30          |
| <b>Grand Total</b>                                    | <b>5</b> | <b>29</b>    | <b>51</b> | <b>44</b>    | <b>129</b>  |
| <b>Households with defecation problems</b>            |          |              |           |              |             |
| 1: Non Beneficiary                                    | 4        | 7            | 11        |              | 22          |
| 3: Relocation in process                              |          | 13           |           |              | 13          |
| 4: Relocated                                          |          | 7            | 17        |              | 24          |
| 5: Infrastructure Upgradation                         |          |              |           | 9            | 9           |
| 6: Identified for relocation                          |          |              |           | 24           | 24          |
| <b>Grand Total</b>                                    | <b>4</b> | <b>27</b>    | <b>28</b> | <b>33</b>    | <b>92</b>   |
| <b>Households with electricity access problems</b>    |          |              |           |              |             |
| 1: Non Beneficiary                                    | 5        |              | 22        |              | 27          |
| 3: Relocation in process                              |          | 3            |           |              | 3           |
| 4: Relocated                                          |          |              | 36        |              | 36          |
| 6: Identified for relocation                          |          |              |           | 2            | 2           |
| <b>Grand Total</b>                                    | <b>5</b> | <b>3</b>     | <b>58</b> | <b>2</b>     | <b>68</b>   |
| <b>Households with school education problems</b>      |          |              |           |              |             |
| 1: Non Beneficiary                                    | 4        | 9            | 10        |              | 23          |
| 2: In Situ Housing                                    |          | 5            |           |              | 5           |
| 3: Relocation in process                              |          | 12           |           |              | 12          |
| 4: Relocated                                          |          | 11           | 21        |              | 32          |
| 5: Infrastructure Upgradation                         |          |              |           | 20           | 20          |
| 6: Identified for relocation                          |          |              |           | 27           | 27          |
| <b>Grand Total</b>                                    | <b>4</b> | <b>37</b>    | <b>31</b> | <b>47</b>    | <b>119</b>  |
| <b>Households with transportation access problems</b> |          |              |           |              |             |
| 1: Non Beneficiary                                    | 5        |              | 19        |              | 24          |
| 3: Relocation in process                              |          | 2            |           |              | 2           |
| 4: Relocated                                          |          |              | 27        |              | 27          |
| 6: Identified for relocation                          |          |              |           | 1            | 1           |
| <b>Grand Total</b>                                    | <b>5</b> | <b>2</b>     | <b>46</b> | <b>1</b>     | <b>54</b>   |



### Work related losses

Of the 25 respondents engaged in fishing, 23 said that they faced serious challenges for long periods of time. Apart from loss of work days, many even said that the catch had substantially reduced since the two cyclones in 2013 and 2014. Four of the 7 respondents engaged in agricultural activities said they faced various kinds of problems in operating from the new sites. This number might be low because the cyclone occurred at a time of the year when most people did not have crops in the field. Early warnings also helped some secure their

outputs in advance. 12 said they faced serious problems in their horticulture work after the cyclones. This number is relatively high for the total number of households in the sample involved in horticulture activities (13). In most of these cases, the outcomes were long-drawn-out as the trees would take much longer to recover and bear fruit again. Many of the horticulturists we spoke to had moved to alternate livelihoods for the time being. 92 respondents out of 116 said they faced challenges with other kinds of work they were involved in, and the reasons included access to work, difficulty in finding work, and loss of productive assets.

| Work related losses among households          | No       | Yes       | Grand Total |
|-----------------------------------------------|----------|-----------|-------------|
| <b>Problems in Fishing activity</b>           |          |           |             |
| <b>1: Non Beneficiary</b>                     | <b>2</b> | <b>13</b> | <b>15</b>   |
| Jalari Peta                                   | 2        | 6         | 8           |
| Markundi                                      |          | 2         | 2           |
| Pudimadaka                                    |          | 5         | 5           |
| <b>3: Relocation in process</b>               |          | <b>10</b> | <b>10</b>   |
| Markundi                                      |          | 10        | 10          |
| <b>Grand Total</b>                            | <b>2</b> | <b>23</b> | <b>25</b>   |
| <b>Problems in agricultural activity</b>      |          |           |             |
| <b>1: Non Beneficiary</b>                     |          | <b>1</b>  | <b>1</b>    |
| Devi Nagar / Ramayapalli / Lakshminagar       |          | 1         | 1           |
| <b>2: In Situ Housing</b>                     | <b>3</b> | <b>1</b>  | <b>4</b>    |
| Devi Nagar / Ramayapalli / Lakshminagar       | 3        | 1         | 4           |
| <b>4: Relocated</b>                           |          | <b>2</b>  | <b>2</b>    |
| Devi Nagar / Ramayapalli / Lakshminagar       |          | 2         | 2           |
| <b>Grand Total</b>                            | <b>3</b> | <b>4</b>  | <b>7</b>    |
| <b>Problems in horticulture activity</b>      |          |           |             |
| <b>1: Non Beneficiary</b>                     |          | <b>1</b>  | <b>1</b>    |
| Devi Nagar / Ramayapalli / Lakshminagar       |          | 1         | 1           |
| <b>2: In Situ Housing</b>                     |          | <b>5</b>  | <b>5</b>    |
| Devi Nagar / Ramayapalli / Lakshminagar       |          | 5         | 5           |
| <b>3: Relocation in process</b>               | <b>1</b> | <b>1</b>  | <b>2</b>    |
| Markundi                                      | 1        | 1         | 2           |
| <b>4: Relocated</b>                           |          | <b>5</b>  | <b>5</b>    |
| Devi Nagar / Ramayapalli / Lakshminagar       |          | 5         | 5           |
| <b>Grand Total</b>                            | <b>1</b> | <b>12</b> | <b>13</b>   |
| <b>Problems in other jobs and professions</b> |          |           |             |
| <b>1: Non Beneficiary</b>                     | <b>5</b> | <b>14</b> | <b>19</b>   |
| ASR Nagar                                     |          | 3         | 3           |

| Work related losses among households    | No        | Yes       | Grand Total |
|-----------------------------------------|-----------|-----------|-------------|
| Devi Nagar / Ramayapalli / Lakshminagar | 2         | 3         | 5           |
| Jalari Peta                             | 2         | 2         | 4           |
| Markundi                                |           | 2         | 2           |
| Sevanagar                               |           | 3         | 3           |
| Sonia Gandhi Nagar                      | 1         |           | 1           |
| Vambay Colony                           |           | 1         | 1           |
| <b>2: In Situ Housing</b>               | <b>2</b>  | <b>1</b>  | <b>3</b>    |
| Sonia Gandhi Nagar                      | 2         | 1         | 3           |
| <b>3: Relocation in process</b>         | <b>1</b>  | <b>6</b>  | <b>7</b>    |
| Markundi                                | 1         | 6         | 7           |
| <b>4: Relocated</b>                     | <b>10</b> | <b>24</b> | <b>34</b>   |
| Devi Nagar / Ramayapalli / Lakshminagar |           | 5         | 5           |
| Paradesipallyam                         | 5         | 6         | 11          |
| Sevanagar                               | 4         | 7         | 11          |
| Vambay Colony                           | 1         | 6         | 7           |
| <b>5: Infrastructure Upgradation</b>    | <b>1</b>  | <b>18</b> | <b>19</b>   |
| Canal Street                            | 1         | 18        | 19          |
| <b>6: Identified for relocation</b>     | <b>5</b>  | <b>29</b> | <b>34</b>   |
| Bada Harijan Sahi                       | 1         | 9         | 10          |
| Khaja Sahi                              |           | 4         | 4           |
| Pichipicha Nagar                        | 2         | 3         | 5           |
| Ramnagar Odiya Sahi                     | 2         | 13        | 15          |
| <b>Grand Total</b>                      | <b>24</b> | <b>92</b> | <b>116</b>  |

#### Other asset losses post-cyclones

Of the 133 responders, 83 said they had suffered losses in their household and/or productive assets. 72 out of

105 said they had suffered losses in household assets, and 30 out of 105 said they had suffered losses in their productive or work-related assets.

| Other losses                            | No       | Yes       | Grand Total |
|-----------------------------------------|----------|-----------|-------------|
| <b>Asset losses</b>                     |          |           |             |
| <b>1: Non Beneficiary</b>               | <b>7</b> | <b>27</b> | <b>34</b>   |
| ASR Nagar                               |          | 8         | 8           |
| Devi Nagar / Ramayapalli / Lakshminagar | 1        | 4         | 5           |
| Jalari Peta                             |          | 10        | 10          |
| Markundi                                | 2        |           | 2           |
| Pudimadaka                              |          | 5         | 5           |
| Sevanagar                               | 2        |           | 2           |
| Sonia Gandhi Nagar                      | 1        |           | 1           |
| Vambay Colony                           | 1        |           | 1           |

| Other losses                            | No        | Yes       | Grand Total |
|-----------------------------------------|-----------|-----------|-------------|
| <b>2: In Situ Housing</b>               | <b>3</b>  | <b>2</b>  | <b>5</b>    |
| Devi Nagar / Ramayapalli / Lakshminagar | 1         | 1         | 2           |
| Sonia Gandhi Nagar                      | 2         | 1         | 3           |
| <b>3: Relocation in process</b>         | <b>3</b>  | <b>11</b> | <b>14</b>   |
| Markundi                                | 3         | 11        | 14          |
| <b>4: Relocated</b>                     | <b>25</b> | <b>13</b> | <b>38</b>   |
| Devi Nagar / Ramayapalli / Lakshminagar | 4         | 2         | 6           |
| Paradesipallyam                         | 10        | 2         | 12          |
| Sevanagar                               | 8         | 5         | 13          |
| Vambay Colony                           | 3         | 4         | 7           |
| <b>5: Infrastructure Upgradation</b>    | <b>3</b>  | <b>13</b> | <b>16</b>   |
| Canal Street                            | 3         | 13        | 16          |
| <b>6: Identified for relocation</b>     | <b>9</b>  | <b>17</b> | <b>26</b>   |
| Bada Harijan Sahi                       | 1         | 6         | 7           |
| Khaja Sahi                              | 1         | 3         | 4           |
| Pichipicha Nagar                        | 2         | 2         | 4           |
| Ramnagar Odiya Sahi                     | 5         | 6         | 11          |
| <b>Grand Total</b>                      | <b>50</b> | <b>83</b> | <b>133</b>  |
| <b>Losses to Household assets</b>       |           |           |             |
| <b>1: Non Beneficiary</b>               | <b>1</b>  | <b>28</b> | <b>29</b>   |
| ASR Nagar                               |           | 8         | 8           |
| Devi Nagar / Ramayapalli / Lakshminagar |           | 4         | 4           |
| Jalari Peta                             |           | 10        | 10          |
| Pudimadaka                              |           | 5         | 5           |
| Sevanagar                               | 1         | 1         | 2           |
| <b>2: In Situ Housing</b>               | <b>2</b>  | <b>2</b>  | <b>4</b>    |
| Devi Nagar / Ramayapalli / Lakshminagar |           | 1         | 1           |
| Sonia Gandhi Nagar                      | 2         | 1         | 3           |
| <b>3: Relocation in process</b>         |           | <b>11</b> | <b>11</b>   |
| Markundi                                |           | 11        | 11          |
| <b>4: Relocated</b>                     | <b>25</b> | <b>9</b>  | <b>34</b>   |
| Devi Nagar / Ramayapalli / Lakshminagar |           | 2         | 2           |
| Paradesipallyam                         | 10        | 2         | 12          |
| Sevanagar                               | 10        | 3         | 13          |
| Vambay Colony                           | 5         | 2         | 7           |
| <b>5: Infrastructure Upgradation</b>    | <b>2</b>  | <b>10</b> | <b>12</b>   |
| Canal Street                            | 2         | 10        | 12          |
| <b>6: Identified for relocation</b>     | <b>3</b>  | <b>12</b> | <b>15</b>   |

| Other losses                                      | No        | Yes       | Grand Total |
|---------------------------------------------------|-----------|-----------|-------------|
| Bada Harijan Sahi                                 | 1         | 4         | 5           |
| Khaja Sahi                                        | 1         | 1         | 2           |
| Pichipicha Nagar                                  | 1         | 1         | 2           |
| Ramnagar Odiya Sahi                               |           | 6         | 6           |
| <b>Grand Total</b>                                | <b>33</b> | <b>72</b> | <b>105</b>  |
| <b>Losses to work related / productive assets</b> |           |           |             |
| <b>1: Non Beneficiary</b>                         | <b>14</b> | <b>15</b> | <b>29</b>   |
| ASR Nagar                                         | 5         | 3         | 8           |
| Devi Nagar / Ramayapalli / Lakshminagar           | 3         | 1         | 4           |
| Jalari Peta                                       | 4         | 6         | 10          |
| Pudimadaka                                        | 1         | 4         | 5           |
| Sevanagar                                         | 1         | 1         | 2           |
| <b>2: In Situ Housing</b>                         | <b>4</b>  |           | <b>4</b>    |
| Devi Nagar / Ramayapalli / Lakshminagar           | 1         |           | 1           |
| Sonia Gandhi Nagar                                | 3         |           | 3           |
| <b>3: Relocation in process</b>                   | <b>8</b>  | <b>3</b>  | <b>11</b>   |
| Markundi                                          | 8         | 3         | 11          |
| <b>4: Relocated</b>                               | <b>28</b> | <b>6</b>  | <b>34</b>   |
| Devi Nagar / Ramayapalli / Lakshminagar           | 2         |           | 2           |
| Paradesipallyam                                   | 12        |           | 12          |
| Sevanagar                                         | 10        | 3         | 13          |
| Vambay Colony                                     | 4         | 3         | 7           |
| <b>5: Infrastructure Upgradation</b>              | <b>9</b>  | <b>3</b>  | <b>12</b>   |
| Canal Street                                      | 9         | 3         | 12          |
| <b>6: Identified for relocation</b>               | <b>12</b> | <b>3</b>  | <b>15</b>   |
| Bada Harijan Sahi                                 | 4         | 1         | 5           |
| Khaja Sahi                                        | 1         | 1         | 2           |
| Pichipicha Nagar                                  | 1         | 1         | 2           |
| Ramnagar Odiya Sahi                               | 6         |           | 6           |
| <b>Grand Total</b>                                | <b>75</b> | <b>30</b> | <b>105</b>  |

### Important things people carried at the time of evacuation

Of the 128 responses, 49 said they carried some items with them at the time of evacuation, whereas 35 said they carried nothing. This number is the highest in

Andhra Pradesh, most likely because people had no memories of the last cyclone (unlike in Odisha) and did not consider the importance of taking their most important things with them as they evacuated. 44 also said that they did not evacuate.

| Whether people carried anything with them at the time of evacuation | Didn't Evacuate | No           | Yes      | Grand Total  |             |
|---------------------------------------------------------------------|-----------------|--------------|----------|--------------|-------------|
| 1: Non Beneficiary                                                  | 9               | 10           | 12       | 31           |             |
| ASR Nagar                                                           | 3               |              | 5        | 8            |             |
| Devi Nagar / Ramayapalli / Lakshminagar                             |                 | 1            | 1        | 2            |             |
| Jalari Peta                                                         | 1               | 5            | 3        | 9            |             |
| Markundi                                                            |                 | 1            | 1        | 2            |             |
| Pudimadaka                                                          |                 | 3            | 2        | 5            |             |
| Sevanagar                                                           | 3               |              |          | 3            |             |
| Sonia Gandhi Nagar                                                  | 1               |              |          | 1            |             |
| Vambay Colony                                                       | 1               |              |          | 1            |             |
| 2: In Situ Housing                                                  | 5               | 3            |          | 8            |             |
| Devi Nagar / Ramayapalli / Lakshminagar                             | 4               | 1            |          | 5            |             |
| Sonia Gandhi Nagar                                                  | 1               | 2            |          | 3            |             |
| 3: Relocation in process                                            |                 | 1            | 8        | 9            |             |
| Markundi                                                            |                 | 1            | 8        | 9            |             |
| 4: Relocated                                                        | 21              | 9            | 6        | 36           |             |
| Devi Nagar / Ramayapalli / Lakshminagar                             |                 | 2            | 2        | 4            |             |
| Paradesipallyam                                                     | 6               | 2            | 4        | 12           |             |
| Sevanagar                                                           | 12              | 1            |          | 13           |             |
| Vambay Colony                                                       | 3               | 4            |          | 7            |             |
| 5: Infrastructure Upgradation                                       | 4               | 6            | 4        | 14           |             |
| Canal Street                                                        | 4               | 6            | 4        | 14           |             |
| 6: Identified for relocation                                        | 5               | 6            | 19       | 30           |             |
| Bada Harijan Sahi                                                   | 1               | 3            | 4        | 8            |             |
| Khaja Sahi                                                          |                 | 2            | 3        | 5            |             |
| Pichipicha Nagar                                                    |                 |              | 3        | 3            |             |
| Ramnagar Odiya Sahi                                                 | 4               | 1            | 9        | 14           |             |
| Grand Total                                                         | 44              | 35           | 49       | 128          |             |
|                                                                     |                 |              |          |              |             |
| Households that did not carry anything with them as they evacuated  | Rural AP        | Rural Odisha | Urban AP | Urban Odisha | Grand Total |
| 1: Non Beneficiary                                                  | 3               | 2            | 5        |              | 10          |
| 2: In Situ Housing                                                  |                 | 1            |          |              | 1           |
| 3: Relocation in process                                            |                 | 1            |          |              | 1           |
| 4: Relocated                                                        |                 | 2            | 9        |              | 11          |
| 5: Infrastructure Upgradation                                       |                 |              |          | 6            | 6           |
| 6: Identified for relocation                                        |                 |              |          | 6            | 6           |
| Grand Total                                                         | 3               | 6            | 14       | 12           | 35          |

What people carry with them at the time of evacuation is an indication of what they consider important as well as what they think they may not have access to in the next few days while being away from home. 31 HHs said they carried documents (IDs, home ownership documents, bank passbooks, etc.), 30 carried food items, 20 carried

clothes, only 9 carried work-related assets, while 5 said they carried some other household items. What people carry with them can also become an asset or a liability in the evacuation areas, as resources available are limited, but the space available is also less.

| Things people carried while evacuating                                     | Rural AP | Rural Odisha | Urban AP  | Urban Odisha | Grand Total |
|----------------------------------------------------------------------------|----------|--------------|-----------|--------------|-------------|
| <b>Households that carried key documents with them while evacuating</b>    |          |              |           |              |             |
| 1: Non Beneficiary                                                         | 2        |              | 8         |              | 10          |
| 3: Relocation in process                                                   |          | 6            |           |              | 6           |
| 4: Relocated                                                               |          | 1            | 2         |              | 3           |
| 5: Infrastructure Upgradation                                              |          |              |           | 1            | 1           |
| 6: Identified for relocation                                               |          |              |           | 11           | 11          |
| <b>Grand Total</b>                                                         | <b>2</b> | <b>7</b>     | <b>10</b> | <b>12</b>    | <b>31</b>   |
| <b>Households that carried food items with them while evacuating</b>       |          |              |           |              |             |
| 1: Non Beneficiary                                                         | 2        | 1            | 6         |              | 9           |
| 3: Relocation in process                                                   |          | 3            |           |              | 3           |
| 4: Relocated                                                               |          | 1            | 5         |              | 6           |
| 6: Identified for relocation                                               |          |              |           | 12           | 12          |
| <b>Grand Total</b>                                                         | <b>2</b> | <b>5</b>     | <b>11</b> | <b>12</b>    | <b>30</b>   |
| <b>Households that carried clothes with them while evacuating</b>          |          |              |           |              |             |
| 1: Non Beneficiary                                                         | 2        | 1            | 4         |              | 7           |
| 3: Relocation in process                                                   |          | 1            |           |              | 1           |
| 4: Relocated                                                               |          |              | 2         |              | 2           |
| 5: Infrastructure Upgradation                                              |          |              |           | 1            | 1           |
| 6: Identified for relocation                                               |          |              |           | 9            | 9           |
| <b>Grand Total</b>                                                         | <b>2</b> | <b>2</b>     | <b>6</b>  | <b>10</b>    | <b>20</b>   |
| <b>Households that carried work related with them while evacuating</b>     |          |              |           |              |             |
| 1: Non Beneficiary                                                         |          | 1            |           |              | 1           |
| 3: Relocation in process                                                   |          | 3            |           |              | 3           |
| 4: Relocated                                                               |          | 1            | 3         |              | 4           |
| 6: Identified for relocation                                               |          |              |           | 1            | 1           |
| <b>Grand Total</b>                                                         |          | <b>5</b>     | <b>3</b>  | <b>1</b>     | <b>9</b>    |
| <b>Households that carried household assets with them while evacuating</b> |          |              |           |              |             |
| 1: Non Beneficiary                                                         |          | 1            |           |              | 1           |
| 6: Identified for relocation                                               |          |              |           | 4            | 4           |
| <b>Grand Total</b>                                                         |          | <b>1</b>     |           | <b>4</b>     | <b>5</b>    |

## Risk sharing

Most people (72 out of 99 responders) took help from their friends and relatives to recover after the cyclones. This is an indication of the social safety nets people rely on at the time of emergencies and crises, but also of what is most accessible. Any destruction to these safety nets and networks could mean creating greater burden as far as their adaptive capacities and resilience to risks is concerned.

72 out of 99 respondents also borrowed money to recover after the cyclone. This is an interesting corollary to

having bank accounts which seems to be widely prevalent and yet did not help them in the time of need and crisis. 76 HHs mentioned that they took loans for recovery. This may imply longer-term burdens for these households. The loans range from Rs 3000 to Rs 2 lakh; the figures vary in keeping with the economic and social capital people have, which are difficult to capture as part of this study. Also, these the rate of interest of these loans varies from 0 per cent to 5 per cent with the most common being 3 percent, as stated by people.

| Risk Sharing                                                    | Rural AP | Rural Odisha | Urban AP  | Urban Odisha | Grand Total |
|-----------------------------------------------------------------|----------|--------------|-----------|--------------|-------------|
| <b>Who did people take help from after the recent cyclones?</b> |          |              |           |              |             |
| <b>1: Non Beneficiary</b>                                       | <b>5</b> | <b>7</b>     | <b>17</b> |              | <b>29</b>   |
| Government                                                      | 1        | 1            | 2         |              | 4           |
| Money lender                                                    | 2        |              | 4         |              | 6           |
| Other Institutions                                              |          |              | 1         |              | 1           |
| Relatives/ Friends/ Neighbours                                  | 2        | 6            | 10        |              | 18          |
| <b>2: In Situ Housing</b>                                       |          | <b>2</b>     |           |              | <b>2</b>    |
| Government                                                      |          | 1            |           |              | 1           |
| Relatives/ Friends/ Neighbours                                  |          | 1            |           |              | 1           |
| <b>3: Relocation in process</b>                                 |          | <b>13</b>    |           |              | <b>13</b>   |
| Relatives/ Friends/ Neighbours                                  |          | 13           |           |              | 13          |
| <b>4: Relocated</b>                                             |          | <b>9</b>     | <b>15</b> |              | <b>24</b>   |
| Employer                                                        |          | 1            |           |              | 1           |
| Money lender                                                    |          |              | 1         |              | 1           |
| Other Institutions                                              |          | 1            | 2         |              | 3           |
| Relatives/ Friends/ Neighbours                                  |          | 7            | 12        |              | 19          |
| <b>5: Infrastructure Upgradation</b>                            |          |              |           | <b>13</b>    | <b>13</b>   |
| Employer                                                        |          |              |           | 3            | 3           |
| Government                                                      |          |              |           | 3            | 3           |
| Other Institutions                                              |          |              |           | 1            | 1           |
| Relatives/ Friends/ Neighbours                                  |          |              |           | 6            | 6           |
| <b>6: Identified for relocation</b>                             |          |              |           | <b>18</b>    | <b>18</b>   |
| Other Institutions                                              |          |              |           | 3            | 3           |
| Relatives/ Friends/ Neighbours                                  |          |              |           | 15           | 15          |
| <b>Grand Total</b>                                              | <b>5</b> | <b>31</b>    | <b>32</b> | <b>31</b>    | <b>99</b>   |

| Risk Sharing                                                                          | Rural AP | Rural Odisha | Urban AP  | Urban Odisha | Grand Total |
|---------------------------------------------------------------------------------------|----------|--------------|-----------|--------------|-------------|
| <b>The type of help families took after the recent cyclone experiences to recover</b> |          |              |           |              |             |
| <b>1: Non Beneficiary</b>                                                             | <b>5</b> | <b>7</b>     | <b>17</b> |              | <b>29</b>   |
| In kind                                                                               |          | 1            | 2         |              | 3           |
| Money                                                                                 | 4        | 4            | 13        |              | 21          |
| Place to stay/cook                                                                    |          | 2            | 1         |              | 3           |
| Others                                                                                | 1        |              | 1         |              | 2           |
| <b>2: In Situ Housing</b>                                                             |          | <b>2</b>     |           |              | <b>2</b>    |
| Money                                                                                 |          | 1            |           |              | 1           |
| Place to stay/cook                                                                    |          | 1            |           |              | 1           |
| <b>3: Relocation in process</b>                                                       |          | <b>13</b>    |           |              | <b>13</b>   |
| Money                                                                                 |          | 11           |           |              | 11          |
| Place to stay/cook                                                                    |          | 2            |           |              | 2           |
| <b>4: Relocated</b>                                                                   |          | <b>9</b>     | <b>15</b> |              | <b>24</b>   |
| In kind                                                                               |          | 1            | 4         |              | 5           |
| Money                                                                                 |          | 7            | 10        |              | 17          |
| Place to stay/cook                                                                    |          | 1            | 1         |              | 2           |
| <b>5: Infrastructure Upgradation</b>                                                  |          |              |           | <b>13</b>    | <b>13</b>   |
| In kind                                                                               |          |              |           | 2            | 2           |
| Money                                                                                 |          |              |           | 10           | 10          |
| Place to stay/cook                                                                    |          |              |           | 1            | 1           |
| <b>6: Identified for relocation</b>                                                   |          |              |           | <b>18</b>    | <b>18</b>   |
| In kind                                                                               |          |              |           | 4            | 4           |
| Labour                                                                                |          |              |           | 1            | 1           |
| Money                                                                                 |          |              |           | 12           | 12          |
| Place to stay/cook                                                                    |          |              |           | 1            | 1           |
| <b>Grand Total</b>                                                                    | <b>5</b> | <b>31</b>    | <b>32</b> | <b>31</b>    | <b>99</b>   |
| <b>Number of households that took loans for recovery after the recent cyclones</b>    |          |              |           |              |             |
| <b>1: Non Beneficiary</b>                                                             | <b>3</b> | <b>5</b>     | <b>9</b>  |              | <b>17</b>   |
| 3: Relocation in process                                                              |          | 13           |           |              | 13          |
| 4: Relocated                                                                          |          | 5            | 9         |              | 14          |
| 5: Infrastructure Upgradation                                                         |          |              |           | 13           | 13          |
| 6: Identified for relocation                                                          |          |              |           | 19           | 19          |
| <b>Grand Total</b>                                                                    | <b>3</b> | <b>23</b>    | <b>18</b> | <b>32</b>    | <b>76</b>   |



### Action people are likely to take if there's a warning of a cyclone in near future (1 week)

This question was asked to learn about people's preparedness, and also their perception of being at risk to

cyclones. 73 out of 143 said that they will move to safe shelters but 60 said they will stay in the same place and not move; 23 of the latter were in the relocated sites.

| Actions people are likely to take if there is a cyclone warning in the near future | We will do what community does | Stay in the same place | Move to safe shelter | Grand Total |
|------------------------------------------------------------------------------------|--------------------------------|------------------------|----------------------|-------------|
| <b>1: Non Beneficiary</b>                                                          |                                | <b>20</b>              | <b>14</b>            | <b>34</b>   |
| ASR Nagar                                                                          |                                | 7                      |                      | 7           |
| Devi Nagar / Ramayapalli / Lakshminagar                                            |                                | 2                      | 4                    | 6           |
| Jalari Peta                                                                        |                                | 4                      | 6                    | 10          |
| Markundi                                                                           |                                |                        | 3                    | 3           |
| Pudimadaka                                                                         |                                | 4                      | 1                    | 5           |
| Sevanagar                                                                          |                                | 3                      |                      | 3           |
| <b>2: In Situ Housing</b>                                                          | <b>4</b>                       | <b>2</b>               | <b>1</b>             | <b>7</b>    |
| Devi Nagar / Ramayapalli / Lakshminagar                                            | 4                              |                        | 1                    | 5           |
| Sonia Gandhi Nagar                                                                 |                                | 2                      |                      | 2           |
| <b>3: Relocation in process</b>                                                    | <b>3</b>                       | <b>2</b>               | <b>9</b>             | <b>14</b>   |
| Markundi                                                                           | 3                              | 2                      | 9                    | 14          |
| <b>4: Relocated</b>                                                                | <b>1</b>                       | <b>23</b>              | <b>11</b>            | <b>35</b>   |
| Devi Nagar / Ramayapalli / Lakshminagar                                            | 1                              | 3                      | 5                    | 9           |
| Paradesipallyam                                                                    |                                | 6                      | 1                    | 7           |
| Sevanagar                                                                          |                                | 9                      | 4                    | 13          |
| Vambay Colony                                                                      |                                | 5                      | 1                    | 6           |
| <b>5: Infrastructure Upgradation</b>                                               | <b>1</b>                       | <b>6</b>               | <b>11</b>            | <b>18</b>   |
| Canal Street                                                                       | 1                              | 6                      | 11                   | 18          |
| <b>6: Identified for relocation</b>                                                | <b>1</b>                       | <b>7</b>               | <b>27</b>            | <b>35</b>   |
| Bada Harijan Sahi                                                                  |                                |                        | 10                   | 10          |
| Khaja Sahi                                                                         |                                | 2                      | 3                    | 5           |
| Pichipicha Nagar                                                                   |                                |                        | 5                    | 5           |
| Ramnagar Odiya Sahi                                                                | 1                              | 5                      | 9                    | 15          |
| <b>Grand Total</b>                                                                 | <b>10</b>                      | <b>60</b>              | <b>73</b>            | <b>143</b>  |

### Actions people are likely to take if there's a cyclone every year

This was asked as an indication of long-term adaptation measures people are likely to adopt against climate risks. Despite knowing that these climatic incidents may happen every year, most people (77 out of 101 respondents) still said that they would not do anything different

and continue to live where they are living. Few (24 out of 101 respondents and mostly those of the younger generation) said that they would move out permanently or take the government's help to find alternatives. This is an indication of what livelihood and migration changes might take place in the long-term in the face of changing climate and increasing frequency and intensity of such events in these areas.

| Actions people are likely to take if there is a cyclone almost every year | Ask for government support | Move permanently | No Change | Grand Total |
|---------------------------------------------------------------------------|----------------------------|------------------|-----------|-------------|
| <b>1: Non Beneficiary</b>                                                 | <b>3</b>                   | <b>5</b>         | <b>19</b> | <b>27</b>   |
| ASR Nagar                                                                 | 2                          |                  | 6         | 8           |
| Devi Nagar / Ramayapalli / Lakshminagar                                   |                            | 1                | 4         | 5           |
| Jalari Peta                                                               | 1                          | 2                | 3         | 6           |
| Markundi                                                                  |                            | 1                | 1         | 2           |
| Pudimadaka                                                                |                            | 1                | 3         | 4           |
| Sevanagar                                                                 |                            |                  | 2         | 2           |
| <b>2: In Situ Housing</b>                                                 |                            |                  | <b>1</b>  | <b>1</b>    |
| Sonia Gandhi Nagar                                                        |                            |                  | 1         | 1           |
| <b>3: Relocation in process</b>                                           |                            | <b>1</b>         | <b>4</b>  | <b>5</b>    |
| Markundi                                                                  |                            | 1                | 4         | 5           |
| <b>4: Relocated</b>                                                       |                            | <b>7</b>         | <b>26</b> | <b>33</b>   |
| Devi Nagar / Ramayapalli / Lakshminagar                                   |                            | 1                | 7         | 8           |
| Paradesipallyam                                                           |                            |                  | 10        | 10          |
| Sevanagar                                                                 |                            | 5                | 5         | 10          |
| Vambay Colony                                                             |                            | 1                | 4         | 5           |
| <b>5: Infrastructure Upgradation</b>                                      |                            | <b>2</b>         | <b>10</b> | <b>12</b>   |
| Canal Street                                                              |                            | 2                | 10        | 12          |
| <b>6: Identified for relocation</b>                                       |                            | <b>6</b>         | <b>17</b> | <b>23</b>   |
| Bada Harijan Sahi                                                         |                            |                  | 4         | 4           |
| Khaja Sahi                                                                |                            | 1                | 2         | 3           |
| Pichipicha Nagar                                                          |                            | 2                | 2         | 4           |
| Ramnagar Odiya Sahi                                                       |                            | 3                | 9         | 12          |
| <b>Grand Total</b>                                                        | <b>3</b>                   | <b>21</b>        | <b>77</b> | <b>101</b>  |

## Resttlement & Relocation interventions findings

### Findings related to resettlement and relocation interventions

Following are the key findings related to the relocation and resettlement interventions.

#### Relocated people by distance from original locations

The sample of sites comprised relocation areas within 1 km from the original site (Markundi) but also households which had been relocated by more than 5, 10 and 20 km. There are also many sites that have been identified

for relocation, but without clear decisions on the new locations, primarily in Berhampur.

#### Average no. of years stated of inhabiting the current location and house

Of the 158 HHs surveyed, 32 said they have been living in the current site for over 50 years (through generations), 55 between 10–50 years, and 20– between 5–10 years. 26 HHs said they have been living in this site between 1–5 years of which 11 belong to the recently relocated type of respondents. 24 HHs stated the residence in the current locations as being for less than one year and almost all of those were recently relocated.

| Distance from original site to relocated site by beneficiary type | Rural Odisha | Urban AP  | Urban Odisha | Grand Total |
|-------------------------------------------------------------------|--------------|-----------|--------------|-------------|
| <b>3: Relocation in process</b>                                   | <b>15</b>    |           |              | <b>15</b>   |
| < 1 km                                                            | 15           |           |              | 15          |
| <b>4: Relocated</b>                                               | <b>11</b>    | <b>33</b> |              | <b>44</b>   |
| < 1 km                                                            |              |           |              |             |
| 1 - 5 km                                                          |              | 1         |              | 1           |
| > 5 km                                                            | 11           | 1         |              | 12          |
| > 10 km                                                           |              | 4         |              | 4           |
| > 20 km                                                           |              | 27        |              | 27          |
| <b>6: Identified for relocation</b>                               |              |           | <b>35</b>    | <b>35</b>   |
| DKCS                                                              |              |           | 35           | 35          |
| <b>Grand Total</b>                                                | <b>26</b>    | <b>34</b> | <b>35</b>    | <b>94</b>   |

| Residence in current locations by no. of years and type of responders | <1 year   | 1- 5 years | 5 - 10 years | 10 - 50 years | 50 + years | Grand Total |
|-----------------------------------------------------------------------|-----------|------------|--------------|---------------|------------|-------------|
| 1: Non Beneficiary                                                    |           | 4          | 7            | 9             | 16         | 36          |
| 2: In Situ Housing                                                    |           |            |              | 3             | 2          | 5           |
| 3: Relocation in process                                              |           | 1          | 1            | 11            | 2          | 15          |
| 4: Relocated                                                          | 23        | 11         | 10           | 2             | 1          | 47          |
| 5: Infrastructure Upgradation                                         | 1         | 4          |              | 11            | 4          | 20          |
| 6: Identified for relocation                                          |           | 6          | 2            | 19            | 7          | 35          |
| <b>Grand Total</b>                                                    | <b>24</b> | <b>26</b>  | <b>20</b>    | <b>55</b>     | <b>32</b>  | <b>158</b>  |

#### Of the relocated, no. of years stated of inhabiting the previous locations

Of the relocated, most people had inhabited the previous location for more than 10 years or had been living there through generations, both in urban AP and rural Odisha. This could have greater implications for the outcomes of these resettlements that need to be studied in detail, in the holistic context of their earlier and new settlements.

continue with their regular activities as before their travel expenses had increased after relocation. Of those who were relocated, 35 said they were facing challenges after relocation, whereas only 8 said they were not facing any serious challenges in operating from the new locations. Most of these who shared concerns belonged to the relocation sites in urban Andhra Pradesh. Of the 24 HHs which gave reasons for changing their work after relocation, 11 in urban AP claimed that they changed their work after being relocated due to an increase in their

| Residence in previous locations by no. of years | Rural Odisha | Urban AP  | Grand Total |
|-------------------------------------------------|--------------|-----------|-------------|
| <1 year                                         |              | 2         | 2           |
| 1- 5 years                                      |              | 1         | 1           |
| 5 - 10 years                                    |              | 2         | 2           |
| 10 - 50 years                                   | 1            | 23        | 24          |
| 50 + years                                      | 6            | 8         | 14          |
| <b>Grand Total</b>                              | <b>7</b>     | <b>36</b> | <b>43</b>   |

#### Problems faced in operating from new sites

Of those who were relocated, 40 HHs responded to this question, and 36 of them said that if they were to

distance from work. Of the relocated, 16 of 31 respondents mentioned that they were facing a reduction in the family income after relocation.

| Change in travel expenditure after risk reduction travel | Increased | No Change | Grand Total |
|----------------------------------------------------------|-----------|-----------|-------------|
| <b>1: Non Beneficiary</b>                                | <b>1</b>  |           | <b>1</b>    |
| Sevanagar                                                | 1         |           | 1           |
| <b>4: Relocated</b>                                      | <b>36</b> | <b>4</b>  | <b>40</b>   |
| Devi Nagar / Ramayapalli / Lakshminagar                  | 9         |           | 9           |
| Paradesipallyam                                          | 10        | 2         | 12          |
| Sevanagar                                                | 13        |           | 13          |
| Vambay Colony                                            | 4         | 2         | 6           |
| <b>Grand Total</b>                                       | <b>37</b> | <b>4</b>  | <b>41</b>   |

| Problems faced in operating from new location | Yes          | No        | Grand Total |
|-----------------------------------------------|--------------|-----------|-------------|
| <b>4: Relocated</b>                           |              |           |             |
| Devi Nagar / Ramayapalli / Lakshminagar       | 11           |           | 11          |
| Paradesipallyam                               | 11           | 1         | 12          |
| Sevanagar                                     | 13           |           | 13          |
| VAMBAY Colony                                 |              | 7         | 7           |
| <b>Grand Total</b>                            | <b>35</b>    | <b>8</b>  | <b>43</b>   |
|                                               |              |           |             |
| Reasons for changing work after relocation    | Rural Odisha | Urban AP  | Grand Total |
| Distance from work increased                  | 1            | 11        | <b>12</b>   |
| Family financial needs                        | 2            | 3         | <b>5</b>    |
| Could not continue after cyclone              | 3            |           | <b>3</b>    |
| Was not of working age                        |              | 2         | <b>2</b>    |
| Retired                                       |              | 1         | <b>1</b>    |
| Got a better job than before                  |              | 1         | <b>1</b>    |
| <b>Grand Total</b>                            | <b>6</b>     | <b>18</b> | <b>24</b>   |

### Type of relocation by division of community

Resettlements tend to divide and mix people in different ways. Some of the resettlements such as Paradesipallyam are a mix of entire communities (auto driver unions and watch manufacturer unions) who lived together

earlier, sub-sections of communities and also singular families. One would need to study what becomes of the voices of people who have moved as single families within the neighbourhood versus those who have moved as a community.

| Division of community by Urban and Rural | Rural Odisha | Urban AP  | Grand Total |
|------------------------------------------|--------------|-----------|-------------|
| <b>3: Relocation in process</b>          | <b>15</b>    |           | <b>15</b>   |
| As part of a community                   | 15           |           | 15          |
| <b>4: Relocated</b>                      | <b>11</b>    | <b>36</b> | <b>47</b>   |
| As entire community                      |              | 17        | 17          |
| As part of a community                   | 11           | 8         | 19          |
| As a family                              |              | 11        | 11          |
| <b>Grand Total</b>                       | <b>26</b>    | <b>36</b> | <b>62</b>   |

| Division of community by sites          | As entire community | As part of a community | As a family | Grand Total |
|-----------------------------------------|---------------------|------------------------|-------------|-------------|
| <b>3: Relocation in process</b>         |                     | <b>15</b>              |             | <b>15</b>   |
| Markundi                                |                     | 15                     |             | 15          |
| <b>4: Relocated</b>                     | <b>17</b>           | <b>19</b>              | <b>11</b>   | <b>47</b>   |
| Devi Nagar / Ramayapalli / Lakshminagar |                     | 11                     |             | 11          |
| Paradesipallyam                         | 4                   | 5                      | 3           | 12          |

| Division of community by sites | As entire community | As part of a community | As a family | Grand Total |
|--------------------------------|---------------------|------------------------|-------------|-------------|
| Sevanagar                      | 10                  |                        | 4           | 14          |
| Sonia Gandhi Nagar             | 3                   |                        |             | 3           |
| Vambay Colony                  |                     | 3                      | 4           | 7           |
| <b>Grand Total</b>             | <b>17</b>           | <b>34</b>              | <b>11</b>   | <b>62</b>   |

### Satisfaction with the new house allocation

Many of those who have relocated, particularly in Markundi & Paradesipallyam, mentioned that they were happy with the houses they got. But there were mixed opinions in some sites such as Devi Nagar, Sonia Gandhi Nagar & VAMBAY colony. The respondents in Sevanagar all vehemently disliked the housing that they were asked to move into. One must note that Sevanagar was a site of evictions whereas the rest were sites where people got to state their choices or accepted relocation.

### Reasons of motivation for relocation

When asked what motivated them to move to a new location for a house, about 25 HHs mentioned safe house as a reason, about 10 said they could not afford the rent, 10 said they wanted a house of their own, and 13 were evicted forcefully and had no choice in the decision to move. Only 4 mentioned better facilities and opportunities of livelihood as their reason.

| People's stated satisfaction with the house allocation | Yes       | No        | Grand Total |
|--------------------------------------------------------|-----------|-----------|-------------|
| <b>2: In Situ Housing</b>                              | <b>5</b>  |           | <b>5</b>    |
| Devi Nagar / Ramayapalli / Lakshminagar                | 5         |           | 5           |
| <b>3: Relocation in process</b>                        | <b>15</b> |           | <b>15</b>   |
| Markundi                                               | 15        |           | 15          |
| <b>4: Relocated</b>                                    | <b>27</b> | <b>20</b> | <b>47</b>   |
| Devi Nagar / Ramayapalli / Lakshminagar                | 8         | 3         | 11          |
| Paradesipallyam                                        | 12        |           | 12          |
| Sevanagar                                              |           | 14        | 14          |
| Sonia Gandhi Nagar                                     | 1         | 2         | 3           |
| Vambay Colony                                          | 6         | 1         | 7           |
| <b>Grand Total</b>                                     | <b>47</b> | <b>20</b> | <b>67</b>   |

| Row Labels                      | Devi Nagar | Markundi  | Paradesipallyam | Sevanagar | Sonia Gandhi Nagar | VAMBAY Colony | Grand Total |
|---------------------------------|------------|-----------|-----------------|-----------|--------------------|---------------|-------------|
| <b>3: Relocation in process</b> |            | <b>15</b> |                 |           |                    |               | <b>15</b>   |
| Safe house                      |            | 15        |                 |           |                    |               | 15          |
| <b>4: Relocated</b>             | <b>11</b>  |           | <b>12</b>       | <b>14</b> | <b>3</b>           | <b>7</b>      | <b>47</b>   |
| Own house                       |            |           | 5               |           | 1                  | 4             | 10          |
| Safe house                      | 10         |           |                 |           |                    |               | 10          |
| Better facilities               | 1          |           | 1               |           | 1                  |               | 3           |
| Can't afford rent               |            |           | 6               |           | 1                  | 3             | 10          |
| Forcibly evicted                |            |           |                 | 13        |                    |               | 13          |
| Better livelihood options       |            |           |                 | 1         |                    |               | 1           |
| <b>Grand Total</b>              | <b>16</b>  | <b>15</b> | <b>12</b>       | <b>14</b> | <b>3</b>           | <b>7</b>      | <b>67</b>   |

### House Ownership details of current residences (business as usual)

While most of the relocated have some form of certification for occupation, most of these are non-alienable, i.e., they cannot be rented out or sold but can only be passed on as inheritance to future generations. Defaulters stand to lose their rights of occupation. Some households who were currently renting these apartments and were actually non-beneficiaries were also interviewed. Of the 123 who responded about their owner-

ship details, 50 were staying in these locations without any certificate of occupancy and 37 said they had non-alienable rights to the house.

The question that arises then is whether a thought needs to be given to such families who have now been staying in these lands for generations, and yet do not have any rights to occupancy. If not tenure, could there be some form of no-eviction rights made available to them such that it enables people to invest in their own improvement?

| Current resident's Housing Status                  | Rural AP | Rural Odisha | Urban AP  | Urban Odisha | Grand Total |
|----------------------------------------------------|----------|--------------|-----------|--------------|-------------|
| <b>House ownership / certificate of occupation</b> |          |              |           |              |             |
| <b>1: Non Beneficiary</b>                          | <b>5</b> | <b>9</b>     | <b>24</b> |              | <b>38</b>   |
| Yes                                                | 1        | 7            | 5         |              | 13          |
| No                                                 | 4        | 2            | 13        |              | 19          |
| Rent                                               |          |              | 6         |              | 6           |
| <b>2: In Situ Housing</b>                          |          | <b>5</b>     |           |              | <b>5</b>    |
| Yes                                                |          | 5            |           |              | 5           |
| <b>3: Relocation in process</b>                    |          | <b>15</b>    |           |              | <b>15</b>   |
| Yes                                                |          | 15           |           |              | 15          |
| <b>4: Relocated</b>                                |          | <b>11</b>    | <b>34</b> |              | <b>45</b>   |
| Yes                                                |          | 11           | 30        |              | 41          |
| No                                                 |          |              | 4         |              | 4           |
| <b>5: Infrastructure Upgradation</b>               |          |              |           | <b>20</b>    | <b>20</b>   |
| Yes                                                |          |              |           | 12           | 12          |
| No                                                 |          |              |           | 8            | 8           |
| <b>6: Identified for relocation</b>                |          |              |           | <b>35</b>    | <b>35</b>   |
| Yes                                                |          |              |           | 17           | 17          |
| No                                                 |          |              |           | 17           | 17          |
| DKCS                                               |          |              |           | 1            | 1           |
| <b>Grand Total</b>                                 | <b>5</b> | <b>40</b>    | <b>58</b> | <b>55</b>    | <b>158</b>  |
| <b>Type of ownership</b>                           |          |              |           |              |             |
| <b>1: Non Beneficiary</b>                          | <b>5</b> | <b>6</b>     | <b>23</b> |              | <b>34</b>   |
| Freehold                                           | 1        |              | 2         |              | 3           |
| Non alienable                                      |          | 4            |           |              | 4           |
| Rent                                               |          |              | 6         |              | 6           |
| Occupation without certificate                     | 4        | 2            | 15        |              | 21          |
| <b>2: In Situ Housing</b>                          |          | <b>2</b>     |           |              | <b>2</b>    |
| Non alienable                                      |          | 2            |           |              | 2           |
| <b>3: Relocation in process</b>                    |          | <b>4</b>     |           |              | <b>4</b>    |
| Non alienable                                      |          | 4            |           |              | 4           |

| Current resident's Housing Status    | Rural AP | Rural Odisha | Urban AP  | Urban Odisha | Grand Total |
|--------------------------------------|----------|--------------|-----------|--------------|-------------|
| <b>4: Relocated</b>                  |          | <b>11</b>    | <b>34</b> |              | <b>45</b>   |
| Freehold                             |          |              | 1         |              | 1           |
| Occupation Certificate               |          |              | 16        |              | 16          |
| Non alienable                        |          | 11           | 13        |              | 24          |
| Occupation without certificate       |          |              | 4         |              | 4           |
| <b>5: Infrastructure Upgradation</b> |          |              |           | <b>11</b>    | <b>11</b>   |
| Freehold                             |          |              |           | 2            | 2           |
| Non alienable                        |          |              |           | 1            | 1           |
| Occupation without certificate       |          |              |           | 8            | 8           |
| <b>6: Identified for relocation</b>  |          |              |           | <b>27</b>    | <b>27</b>   |
| Freehold                             |          |              |           | 7            | 7           |
| Occupation Certificate               |          |              |           | 1            | 1           |
| Non alienable                        |          |              |           | 2            | 2           |
| Occupation without certificate       |          |              |           | 17           | 17          |
| <b>Grand Total</b>                   | <b>5</b> | <b>23</b>    | <b>57</b> | <b>38</b>    | <b>123</b>  |

### House ownership by gender

House ownership in the non-relocated (type 1, 2, 3, 5 and 6) households (52 responders) is primarily (32HHs) owned by the male, whereas the relocated houses are

now more in the name of women (33 out of 43) as part of the policies of most relocation programmes. This is an intervention that may have far-reaching outcomes that could be studied in the long term.

| House ownership by gender (current residences) | Rural AP | Rural Odisha | Urban AP  | Urban Odisha | Grand Total |
|------------------------------------------------|----------|--------------|-----------|--------------|-------------|
| <b>1: Non Beneficiary</b>                      | <b>1</b> | <b>7</b>     | <b>9</b>  |              | <b>17</b>   |
| Female                                         |          | 1            | 1         |              | 2           |
| Male                                           | 1        | 4            | 4         |              | 9           |
| Male and Female                                |          | 2            |           |              | 2           |
| Male (Relative)                                |          |              | 2         |              | 2           |
| Female (Relative)                              |          |              | 2         |              | 2           |
| <b>2: In Situ Housing</b>                      |          | <b>5</b>     |           |              | <b>5</b>    |
| Female                                         |          | 4            |           |              | 4           |
| Male                                           |          | 1            |           |              | 1           |
| <b>3: Relocation in process</b>                |          | <b>15</b>    |           |              | <b>15</b>   |
| Female                                         |          | 6            |           |              | 6           |
| Male                                           |          | 9            |           |              | 9           |
| <b>4: Relocated</b>                            |          | <b>11</b>    | <b>32</b> |              | <b>43</b>   |
| Female                                         |          | 7            | 20        |              | 27          |
| Male                                           |          | 2            | 8         |              | 10          |
| Male and Female                                |          | 2            | 2         |              | 4           |



| House ownership by gender (current residences) | Rural AP | Rural Odisha | Urban AP  | Urban Odisha | Grand Total |
|------------------------------------------------|----------|--------------|-----------|--------------|-------------|
| Female (Relative)                              |          |              | 2         |              | 2           |
| <b>5: Infrastructure Upgradation</b>           |          |              |           | <b>13</b>    | <b>13</b>   |
| Female                                         |          |              |           | 3            | 3           |
| Male                                           |          |              |           | 8            | 8           |
| Male and Female                                |          |              |           | 1            | 1           |
| Female (Relative)                              |          |              |           | 1            | 1           |
| <b>6: Identified for relocation</b>            |          |              |           | <b>17</b>    | <b>17</b>   |
| Allotted                                       |          |              |           | 1            | 1           |
| Female                                         |          |              |           | 4            | 4           |
| Male                                           |          |              |           | 12           | 12          |
| <b>Grand Total</b>                             | <b>1</b> | <b>38</b>    | <b>41</b> | <b>30</b>    | <b>110</b>  |

### House ownership before relocation

Of those who were beneficiaries of various housing allocations across Odisha and Andhra Pradesh, most people had some form of occupation rights (non-alienable patta, certificate of occupation, etc.) but there were also many instances (20 out of 34) in urban Andhra where

renters (14 out of 45 HH) also who by choice moved to the new locations.

### Form in which allocation received

In ODRP projects, people received money to construct houses (31 out of 66 responders), whereas in JNNURM

| House ownership before allocation of new house | Rural Odisha | Urban AP  | Grand Total |
|------------------------------------------------|--------------|-----------|-------------|
| <b>2: In Situ Housing</b>                      | <b>5</b>     |           | <b>5</b>    |
| Yes                                            | 5            |           | 5           |
| <b>3: Relocation in process</b>                | <b>15</b>    |           | <b>15</b>   |
| Yes                                            | 15           |           | 15          |
| <b>4: Relocated</b>                            | <b>11</b>    | <b>34</b> | <b>45</b>   |
| No                                             |              | 20        | 20          |
| Rent                                           |              | 14        | 14          |
| Yes                                            | 11           |           | 11          |
| <b>Grand Total</b>                             | <b>31</b>    | <b>34</b> | <b>65</b>   |

people did not have occupation certificates in their original locations (and were essentially evicted and made to move to the new sites). There were many instances of

and other programmatic allocations, people received constructed houses (35 out of 66 responders) after paying a beneficiary contribution in many cases.

| Form of allocation              | Rural Odisha | Urban AP  | Grand Total |
|---------------------------------|--------------|-----------|-------------|
| <b>2: In Situ Housing</b>       | <b>5</b>     | <b>3</b>  | <b>8</b>    |
| Constructed house               |              | 3         | 3           |
| Money                           | 5            |           | 5           |
| <b>3: Relocation in process</b> | <b>15</b>    |           | <b>15</b>   |
| Money                           | 15           |           | 15          |
| <b>4: Relocated</b>             | <b>11</b>    | <b>32</b> | <b>43</b>   |

| Form of allocation | Rural Odisha | Urban AP  | Grand Total |
|--------------------|--------------|-----------|-------------|
| Constructed house  |              | 32        | 32          |
| Money              | 11           |           | 11          |
| <b>Grand Total</b> | <b>31</b>    | <b>35</b> | <b>66</b>   |

### Self-built or contractor-built

Of those who received money for construction, most people (12 out of 31 responders) engaged contractors as a group to build their houses. Many of them also hired contractors individually. Some of them who could make the time to build their own houses did so either as labourers or as masons (9 out of 31). Few also participated in building their own houses after getting trained

### Purpose given to the old houses

When asked what the old sites of habitation are being used as, most people in rural Odisha (13 out of 15 respondents) said that they were using them either for themselves or for other family members. Most people (16 out of 18 HH) in urban AP mentioned that either the houses were demolished, or if they were renters, they did not know how the old houses were being used.

| Type of owner-build housing     | Rural Odisha | Grand Total |
|---------------------------------|--------------|-------------|
| <b>2: In Situ Housing</b>       | <b>5</b>     | <b>5</b>    |
| Contractor - Group              | 1            | 1           |
| Self                            | 4            | 4           |
| <b>3: Relocation in process</b> | <b>15</b>    | <b>15</b>   |
| Self                            | 5            | 5           |
| Contractor - Individual         | 10           | 10          |
| <b>4: Relocated</b>             | <b>11</b>    | <b>11</b>   |
| Contractor - Group              | 11           | 11          |
| <b>Grand Total</b>              | <b>31</b>    | <b>31</b>   |

in the mason training programme. In many cases where the contractor was engaged by a group of people, there were complaints about the quality of construction with cracks showing up already. On the other hand, in most cases where people were able to build the houses themselves, they seemed satisfied with the construction.

It is yet to be seen in terms of long-term risk reduction outcomes of these differential policy decisions, whether it is advisable to let people hold on to their older houses, versus moving them entirely.

| Use given to the original site of habitation | Rural Odisha | Urban AP  | Grand Total |
|----------------------------------------------|--------------|-----------|-------------|
| <b>1: Non Beneficiary</b>                    |              | <b>1</b>  | <b>1</b>    |
| Demolished/Evicted                           |              | 1         | 1           |
| <b>2: In Situ Housing</b>                    | <b>1</b>     | <b>1</b>  | <b>2</b>    |
| Demolished/Evicted                           |              | 1         | 1           |
| Other family                                 | 1            |           | 1           |
| <b>3: Relocation in process</b>              | <b>4</b>     |           | <b>4</b>    |
| Self                                         | 2            |           | 2           |
| Vacant                                       | 2            |           | 2           |
| <b>4: Relocated</b>                          | <b>10</b>    | <b>16</b> | <b>26</b>   |
| Demolished/Evicted                           |              | 14        | 14          |
| Other family                                 | 3            | 2         | 5           |
| Self                                         | 7            |           | 7           |
| <b>Grand Total</b>                           | <b>15</b>    | <b>18</b> | <b>33</b>   |

| Use given to the original site of habitation by site | Demolished/<br>Evicted | DKCS      | Other family | Self      | Grand Total |
|------------------------------------------------------|------------------------|-----------|--------------|-----------|-------------|
| <b>1: Non Beneficiary</b>                            | <b>4</b>               | <b>1</b>  |              |           | <b>5</b>    |
| Sevanagar                                            | 3                      |           |              |           | 3           |
| Sonia Gandhi Nagar                                   | 1                      |           |              |           | 1           |
| Vambay Colony                                        |                        | 1         |              |           | 1           |
| <b>2: In Situ Housing</b>                            | <b>3</b>               |           | <b>1</b>     | <b>4</b>  | <b>8</b>    |
| Devi Nagar / Ramayapalli / Lakshminagar              |                        |           | 1            | 4         | 5           |
| Sonia Gandhi Nagar                                   | 3                      |           |              |           | 3           |
| <b>3: Relocation in process</b>                      |                        |           |              | <b>14</b> | <b>14</b>   |
| Markundi                                             |                        |           |              | 14        | 15          |
| <b>4: Relocated</b>                                  | <b>13</b>              | <b>18</b> | <b>4</b>     | <b>8</b>  | <b>43</b>   |
| Devi Nagar / Ramayapalli / Lakshminagar              |                        |           | 3            | 8         | 11          |
| Paradesipallyam                                      |                        | 11        | 1            |           | 12          |
| Sevanagar                                            | 13                     |           |              |           | 13          |
| Vambay Colony                                        |                        | 7         |              |           | 7           |
| <b>Grand Total</b>                                   | <b>20</b>              | <b>19</b> | <b>5</b>     | <b>26</b> | <b>70</b>   |

#### Source of drinking water before and after relocation

There seems to be a marginal improvement in drinking water facilities after the housing intervention was made. Before relocation, almost 50 per cent of respondents (34 out of 66) were dependent on hand pumps for their water supply, but after the housing intervention (66

respondents in type 2, 3 and 4), only 13 said they are still using hand pumps. 21 out of 43 HHs said they use piped water connection for their drinking water needs after the relocation, whereas only 10 out of 43 respondents had access to piped water before relocation. But in-situ housing still continues to rely on hand pumps and public taps, despite the housing upgradation.

| Drinking water Source                    | Rural AP | Rural Odisha | Urban AP  | Urban Odisha | Grand Total |
|------------------------------------------|----------|--------------|-----------|--------------|-------------|
| <b>Business as usual (when surveyed)</b> |          |              |           |              |             |
| <b>1: Non Beneficiary</b>                | <b>5</b> | <b>9</b>     | <b>23</b> |              | <b>37</b>   |
| Hand pump                                | 1        | 5            | 3         |              | 9           |
| Piped Water Connection                   |          | 3            | 3         |              | 6           |
| Public Tap                               | 2        | 1            | 15        |              | 18          |
| Water cans                               | 2        |              |           |              | 2           |
| Water tank                               |          |              | 2         |              | 2           |
| <b>2: In Situ Housing</b>                |          | <b>5</b>     | <b>3</b>  |              | <b>8</b>    |
| Hand pump                                |          | 3            | 2         |              | 5           |
| Public Tap                               |          | 2            | 1         |              | 3           |
| <b>3: Relocation in process</b>          |          | <b>15</b>    |           |              | <b>15</b>   |
| Hand pump                                |          | 6            |           |              | 6           |
| Piped Water Connection                   |          | 3            |           |              | 3           |

| Drinking water Source                | Rural AP | Rural Odisha | Urban AP  | Urban Odisha | Grand Total |
|--------------------------------------|----------|--------------|-----------|--------------|-------------|
| Public Tap                           |          | 6            |           |              | 6           |
| <b>4: Relocated</b>                  |          | <b>11</b>    | <b>32</b> |              | <b>43</b>   |
| Hand pump                            |          | 2            | 1         |              | 3           |
| Piped Water Connection               |          | 7            | 14        |              | 21          |
| Public Tap                           |          | 1            | 13        |              | 14          |
| Tube well                            |          | 1            |           |              | 1           |
| Water cans                           |          |              | 1         |              | 1           |
| Water tank                           |          |              | 3         |              | 3           |
| <b>5: Infrastructure Upgradation</b> |          |              |           | <b>20</b>    | <b>20</b>   |
| Hand pump                            |          |              |           | 3            | 3           |
| Piped Water Connection               |          |              |           | 6            | 6           |
| Public Tap                           |          |              |           | 8            | 8           |
| Tube well                            |          |              |           | 3            | 3           |
| <b>6: Identified for relocation</b>  |          |              |           | <b>35</b>    | <b>35</b>   |
| Hand pump                            |          |              |           | 8            | 8           |
| Piped Water Connection               |          |              |           | 3            | 3           |
| Public Tap                           |          |              |           | 23           | 23          |
| Tube well                            |          |              |           | 1            | 1           |
| <b>Grand Total</b>                   | <b>5</b> | <b>40</b>    | <b>58</b> | <b>55</b>    | <b>158</b>  |
| <b>Before new housing allocation</b> |          |              |           |              |             |
| <b>2: In Situ Housing</b>            |          | <b>5</b>     | <b>3</b>  |              | <b>8</b>    |
| Hand pump                            |          | 4            | 3         |              | 7           |
| Public Tap                           |          | 1            |           |              | 1           |
| <b>3: Relocation in process</b>      |          | <b>15</b>    |           |              | <b>15</b>   |
| Hand pump                            |          | 15           |           |              | 15          |
| <b>4: Relocated</b>                  |          | <b>11</b>    | <b>32</b> |              | <b>43</b>   |
| Bore pipe connection                 |          |              | 1         |              | 1           |
| Hand pump                            |          | 5            | 9         |              | 14          |
| Piped Water Connection               |          | 6            | 4         |              | 10          |
| Public Tap                           |          |              | 8         |              | 8           |
| Water Cans                           |          |              | 2         |              | 2           |
| Water Tank                           |          |              | 8         |              | 8           |
| <b>Grand Total</b>                   |          | <b>31</b>    | <b>35</b> |              | <b>66</b>   |

### Prevalence and use of toilets before and after relocation

There is also a marginal improvement in the access to toilets after the housing interventions. While 34 respondents (of 51 responders of in-situ type 2 and relocated type 4) had mentioned that they practised open defecation before the housing intervention, 45 out of 46 HHs in these types of respondents said that they now had toilets. Only 1 house in the in-situ category is still practising open defecation (potentially because they

were still completing the construction of their toilet). The other categories of respondents (non-beneficiaries, on-site upgradation and identified for relocation) still do not have access to toilets (20 of 33, 7 of 16 and 15 of 28 respectively). But the level of utility of these toilets in the relocated sites varied. Reasons people gave for not using some of these toilets included: weak doors, lack of water supply, leaking soak pits and pipes, too close to the house, etc. But more or less once provided, most people seemed to be using them.

| Prevalence of toilets in current locations of residence | No        | Yes       | Grand Total |
|---------------------------------------------------------|-----------|-----------|-------------|
| <b>1: Non Beneficiary</b>                               | <b>20</b> | <b>13</b> | <b>33</b>   |
| ASR Nagar                                               | 5         | 3         | 8           |
| Devi Nagar / Ramayapalli / Lakshminagar                 | 2         | 3         | 5           |
| Jalari Peta                                             | 8         | 2         | 10          |
| Pudimadaka                                              | 5         |           | 5           |
| Sevanagar                                               |           | 3         | 3           |
| Sonia Gandhi Nagar                                      |           | 1         | 1           |
| Vambay Colony                                           |           | 1         | 1           |
| <b>2: In Situ Housing</b>                               | <b>1</b>  | <b>3</b>  | <b>4</b>    |
| Devi Nagar / Ramayapalli / Lakshminagar                 | 1         |           | 1           |
| Sonia Gandhi Nagar                                      |           | 3         | 3           |
| <b>3: Relocation in process</b>                         | <b>10</b> | <b>3</b>  | <b>13</b>   |
| Markundi                                                | 10        | 3         | 13          |
| <b>4: Relocated</b>                                     |           | <b>42</b> | <b>42</b>   |
| Devi Nagar / Ramayapalli / Lakshminagar                 |           | 10        | 10          |
| Paradesipallyam                                         |           | 12        | 12          |
| Sevanagar                                               |           | 13        | 13          |
| Vambay Colony                                           |           | 7         | 7           |
| <b>5: Infrastructure Upgradation</b>                    | <b>7</b>  | <b>9</b>  | <b>16</b>   |
| Canal Street                                            | 7         | 9         | 16          |
| <b>6: Identified for relocation</b>                     | <b>15</b> | <b>13</b> | <b>28</b>   |
| Bada Harijan Sahi                                       | 6         | 4         | 10          |
| Khaja Sahi                                              | 3         |           | 3           |
| Pichipicha Nagar                                        | 3         | 2         | 5           |
| Ramnagar Odiya Sahi                                     | 3         | 7         | 10          |
| <b>Grand Total</b>                                      | <b>53</b> | <b>83</b> | <b>136</b>  |

| Ways of defecation before housing allocations | Open defecation | Toilet    | Grand Total |
|-----------------------------------------------|-----------------|-----------|-------------|
| <b>2: In Situ Housing</b>                     | <b>8</b>        |           | <b>8</b>    |
| Devi Nagar / Ramayapalli / Lakshminagar       | 5               |           | 5           |
| Sonia Gandhi Nagar                            | 3               |           | 3           |
| <b>3: Relocation in process</b>               | <b>12</b>       | <b>3</b>  | <b>15</b>   |
| Markundi                                      | 12              | 3         | 15          |
| <b>4: Relocated</b>                           | <b>26</b>       | <b>17</b> | <b>43</b>   |
| Devi Nagar / Ramayapalli / Lakshminagar       | 10              | 1         | 11          |
| Paradesipallyam                               | 1               | 11        | 12          |
| Sevanagar                                     | 13              |           | 13          |
| Vambay Colony                                 | 2               | 5         | 7           |
| <b>Grand Total</b>                            | <b>46</b>       | <b>20</b> | <b>66</b>   |

### Changes in animal rearing practices

There have been instances, particularly in Canal Street and Ram Nagar Odiya Sahi in Odisha, where people lost their livelihood after the cyclone. In some cases, people mentioned their cattle had suffered severe shocks and stopped giving milk for a long time, and many died in the long term. This has affected some families' main source of income. The numbers are small because the sample included very few animal-rearers (8 HHs), and none of them belonged to the type 4 category of relocated people. But most of these people suffered shocks after the cyclone. This needs to be studied further, particularly to learn how people could be re-engaged with their

livelihood in cases of relocation such that shocks are not exacerbated.

### Problems faced in current location

Of the relocated people in the current locations, the problems faced by them included that of livelihood (31 out of 42), housing (20 out of 43), drinking water (24 out of 43), sanitation (18 out of 43), electricity (15 out of 43), health (25 out of 43), education (18 out of 39), and transportation (29 out of 42). Most of them did not find rent (only 4 of 43) and missing the feeling of a community (8 out of 41) as a problem after relocation. Other problems mentioned by many included safety, snakes, open drains, access to markets, etc.

| Problems at Current Location              | Earlier yes but not now | None      | Yes       | Grand Total |
|-------------------------------------------|-------------------------|-----------|-----------|-------------|
| <b>Livelihoods (in current locations)</b> |                         |           |           |             |
| <b>1: Non Beneficiary</b>                 |                         | <b>14</b> | <b>22</b> | <b>36</b>   |
| ASR Nagar                                 |                         | 2         | 6         | 8           |
| Devi Nagar / Ramayapalli / Lakshminagar   |                         | 2         | 4         | 6           |
| Jalari Peta                               |                         | 4         | 5         | 9           |
| Markundi                                  |                         | 1         | 2         | 3           |
| Pudimadaka                                |                         | 2         | 3         | 5           |
| Sevanagar                                 |                         | 1         | 2         | 3           |
| Sonia Gandhi Nagar                        |                         | 1         |           | 1           |
| Vambay Colony                             |                         | 1         |           | 1           |
| <b>2: In Situ Housing</b>                 |                         | <b>4</b>  | <b>4</b>  | <b>8</b>    |
| Devi Nagar / Ramayapalli / Lakshminagar   |                         | 2         | 3         | 5           |
| Sonia Gandhi Nagar                        |                         | 2         | 1         | 3           |

| Problems at Current Location             | Earlier yes but not now | None      | Yes       | Grand Total |
|------------------------------------------|-------------------------|-----------|-----------|-------------|
| <b>3: Relocation in process</b>          |                         | <b>4</b>  | <b>11</b> | <b>15</b>   |
| Markundi                                 |                         | 4         | 11        | 15          |
| <b>4: Relocated</b>                      | <b>1</b>                | <b>11</b> | <b>30</b> | <b>42</b>   |
| Devi Nagar / Ramayapalli / Laksh-minagar |                         | 3         | 8         | 11          |
| Paradesipallyam                          |                         | 4         | 7         | 11          |
| Sevanagar                                |                         |           | 13        | 13          |
| Vambay Colony                            | 1                       | 4         | 2         | 7           |
| <b>5: Infrastructure Upgradation</b>     |                         | <b>13</b> | <b>6</b>  | <b>19</b>   |
| Canal Street                             |                         | 13        | 6         | 19          |
| <b>6: Identified for relocation</b>      |                         | <b>25</b> | <b>9</b>  | <b>34</b>   |
| Bada Harijan Sahi                        |                         | 7         | 3         | 10          |
| Khaja Sahi                               |                         | 4         | 1         | 5           |
| Pichipicha Nagar                         |                         | 3         | 2         | 5           |
| Ramnagar Odiya Sahi                      |                         | 11        | 3         | 14          |
| <b>Grand Total</b>                       | <b>1</b>                | <b>71</b> | <b>82</b> | <b>154</b>  |
| <b>Rent (in current locations)</b>       |                         |           |           |             |
| <b>1: Non Beneficiary</b>                |                         | <b>31</b> | <b>5</b>  | <b>36</b>   |
| ASR Nagar                                |                         | 7         | 1         | 8           |
| Devi Nagar / Ramayapalli / Laksh-minagar |                         | 5         | 1         | 6           |
| Jalari Peta                              |                         | 9         |           | 9           |
| Markundi                                 |                         | 3         |           | 3           |
| Pudimadaka                               |                         | 4         | 1         | 5           |
| Sevanagar                                |                         | 2         | 1         | 3           |
| Sonia Gandhi Nagar                       |                         |           | 1         | 1           |
| Vambay Colony                            |                         | 1         |           | 1           |
| <b>2: In Situ Housing</b>                |                         | <b>7</b>  | <b>1</b>  | <b>8</b>    |
| Devi Nagar / Ramayapalli / Laksh-minagar |                         | 5         |           | 5           |
| Sonia Gandhi Nagar                       |                         | 2         | 1         | 3           |
| <b>3: Relocation in process</b>          |                         | <b>15</b> |           | <b>15</b>   |
| Markundi                                 |                         | 15        |           | 15          |
| <b>4: Relocated</b>                      |                         | <b>39</b> | <b>4</b>  | <b>43</b>   |
| Devi Nagar / Ramayapalli / Laksh-minagar |                         | 11        |           | 11          |
| Paradesipallyam                          |                         | 12        |           | 12          |
| Sevanagar                                |                         | 10        | 3         | 13          |
| Vambay Colony                            |                         | 6         | 1         | 7           |

| Problems at Current Location             | Earlier yes but not now | None       | Yes       | Grand Total |
|------------------------------------------|-------------------------|------------|-----------|-------------|
| <b>5: Infrastructure Upgradation</b>     |                         | <b>16</b>  | <b>4</b>  | <b>20</b>   |
| Canal Street                             |                         | 16         | 4         | 20          |
| <b>6: Identified for relocation</b>      |                         | <b>33</b>  |           | <b>33</b>   |
| Bada Harijan Sahi                        |                         | 10         |           | 10          |
| Khaja Sahi                               |                         | 5          |           | 5           |
| Pichipicha Nagar                         |                         | 3          |           | 3           |
| Ramnagar Odiya Sahi                      |                         | 15         |           | 15          |
| <b>Grand Total</b>                       |                         | <b>141</b> | <b>14</b> | <b>155</b>  |
| <b>Housing (in current locations)</b>    |                         |            |           |             |
| <b>1: Non Beneficiary</b>                |                         | <b>18</b>  | <b>18</b> | <b>36</b>   |
| ASR Nagar                                |                         | 2          | 6         | 8           |
| Devi Nagar / Ramayapalli / Laksh-minagar |                         | 6          |           | 6           |
| Jalari Peta                              |                         | 4          | 5         | 9           |
| Markundi                                 |                         | 3          |           | 3           |
| Pudimadaka                               |                         |            | 5         | 5           |
| Sevanagar                                |                         | 1          | 2         | 3           |
| Sonia Gandhi Nagar                       |                         | 1          |           | 1           |
| Vambay Colony                            |                         | 1          |           | 1           |
| <b>2: In Situ Housing</b>                |                         | <b>6</b>   | <b>2</b>  | <b>8</b>    |
| Devi Nagar / Ramayapalli / Laksh-minagar |                         | 5          |           | 5           |
| Sonia Gandhi Nagar                       |                         | 1          | 2         | 3           |
| <b>3: Relocation in process</b>          |                         | <b>12</b>  | <b>3</b>  | <b>15</b>   |
| Markundi                                 |                         | 12         | 3         | 15          |
| <b>4: Relocated</b>                      |                         | <b>23</b>  | <b>20</b> | <b>43</b>   |
| Devi Nagar / Ramayapalli / Laksh-minagar |                         | 8          | 3         | 11          |
| Paradesipallyam                          |                         | 10         | 2         | 12          |
| Sevanagar                                |                         | 2          | 11        | 13          |
| Vambay Colony                            |                         | 3          | 4         | 7           |
| <b>5: Infrastructure Upgradation</b>     |                         | <b>14</b>  | <b>6</b>  | <b>20</b>   |
| Canal Street                             |                         | 14         | 6         | 20          |
| <b>6: Identified for relocation</b>      |                         | <b>28</b>  | <b>6</b>  | <b>34</b>   |
| Bada Harijan Sahi                        |                         | 9          | 1         | 10          |
| Khaja Sahi                               |                         | 5          |           | 5           |
| Pichipicha Nagar                         |                         | 1          | 4         | 5           |
| Ramnagar Odiya Sahi                      |                         | 13         | 1         | 14          |
| <b>Grand Total</b>                       |                         | <b>101</b> | <b>55</b> | <b>156</b>  |



| Problems at Current Location                 | Earlier yes but not now | None      | Yes       | Grand Total |
|----------------------------------------------|-------------------------|-----------|-----------|-------------|
| <b>Drinking Water (in current locations)</b> |                         |           |           |             |
| <b>1: Non Beneficiary</b>                    |                         | <b>19</b> | <b>17</b> | <b>36</b>   |
| ASR Nagar                                    |                         | 3         | 5         | 8           |
| Devi Nagar / Ramayapalli / Laksh-minagar     |                         | 4         | 2         | 6           |
| Jalari Peta                                  |                         | 7         | 2         | 9           |
| Markundi                                     |                         | 3         |           | 3           |
| Pudimadaka                                   |                         | 1         | 4         | 5           |
| Sevanagar                                    |                         | 1         | 2         | 3           |
| Sonia Gandhi Nagar                           |                         |           | 1         | 1           |
| Vambay Colony                                |                         |           | 1         | 1           |
| <b>2: In Situ Housing</b>                    |                         | <b>5</b>  | <b>3</b>  | <b>8</b>    |
| Devi Nagar / Ramayapalli / Laksh-minagar     |                         | 5         |           | 5           |
| Sonia Gandhi Nagar                           |                         |           | 3         | 3           |
| <b>3: Relocation in process</b>              |                         | <b>12</b> | <b>3</b>  | <b>15</b>   |
| Markundi                                     |                         | 12        | 3         | 15          |
| <b>4: Relocated</b>                          | <b>1</b>                | <b>18</b> | <b>24</b> | <b>43</b>   |
| Devi Nagar / Ramayapalli / Laksh-minagar     |                         | 7         | 4         | 11          |
| Paradesipallyam                              |                         | 7         | 5         | 12          |
| Sevanagar                                    |                         |           | 13        | 13          |
| Vambay Colony                                | 1                       | 4         | 2         | 7           |
| <b>5: Infrastructure Upgradation</b>         |                         | <b>12</b> | <b>8</b>  | <b>20</b>   |
| Canal Street                                 |                         | 12        | 8         | 20          |
| <b>6: Identified for relocation</b>          |                         | <b>17</b> | <b>17</b> | <b>34</b>   |
| Bada Harijan Sahi                            |                         | 6         | 4         | 10          |
| Khaja Sahi                                   |                         | 3         | 2         | 5           |
| Pichipicha Nagar                             |                         | 2         | 3         | 5           |
| Ramnagar Odiya Sahi                          |                         | 6         | 8         | 14          |
| <b>Grand Total</b>                           | <b>1</b>                | <b>83</b> | <b>72</b> | <b>156</b>  |
| <b>Sanitation (in current locations)</b>     |                         |           |           |             |
| <b>1: Non Beneficiary</b>                    |                         | <b>21</b> | <b>15</b> | <b>36</b>   |
| ASR Nagar                                    |                         | 3         | 5         | 8           |
| Devi Nagar / Ramayapalli / Laksh-minagar     |                         | 5         | 1         | 6           |
| Jalari Peta                                  |                         | 5         | 4         | 9           |
| Markundi                                     |                         | 3         |           | 3           |
| Pudimadaka                                   |                         | 1         | 4         | 5           |

| Problems at Current Location              | Earlier yes but not now | None      | Yes       | Grand Total |
|-------------------------------------------|-------------------------|-----------|-----------|-------------|
| Sevanagar                                 |                         | 2         | 1         | 3           |
| Sonia Gandhi Nagar                        |                         | 1         |           | 1           |
| Vambay Colony                             |                         | 1         |           | 1           |
| <b>2: In Situ Housing</b>                 |                         | <b>8</b>  |           | <b>8</b>    |
| Devi Nagar / Ramayapalli / Laksh-minagar  |                         | 5         |           | 5           |
| Sonia Gandhi Nagar                        |                         | 3         |           | 3           |
| <b>3: Relocation in process</b>           |                         | <b>10</b> | <b>5</b>  | <b>15</b>   |
| Markundi                                  |                         | 10        | 5         | 15          |
| <b>4: Relocated</b>                       |                         | <b>25</b> | <b>18</b> | <b>43</b>   |
| Devi Nagar / Ramayapalli / Laksh-minagar  |                         | 8         | 3         | 11          |
| Paradesipallyam                           |                         | 11        | 1         | 12          |
| Sevanagar                                 |                         | 2         | 11        | 13          |
| Vambay Colony                             |                         | 4         | 3         | 7           |
| <b>5: Infrastructure Upgradation</b>      |                         | <b>14</b> | <b>6</b>  | <b>20</b>   |
| Canal Street                              |                         | 14        | 6         | 20          |
| <b>6: Identified for relocation</b>       |                         | <b>18</b> | <b>17</b> | <b>35</b>   |
| Bada Harijan Sahi                         |                         | 10        |           | 10          |
| Khaja Sahi                                |                         |           | 5         | 5           |
| Pichipicha Nagar                          |                         |           | 5         | 5           |
| Ramnagar Odiya Sahi                       |                         | 8         | 7         | 15          |
| <b>Grand Total</b>                        |                         | <b>96</b> | <b>61</b> | <b>157</b>  |
| <b>Electricity (in current locations)</b> |                         |           |           |             |
| <b>1: Non Beneficiary</b>                 |                         | <b>26</b> | <b>10</b> | <b>36</b>   |
| ASR Nagar                                 |                         | 3         | 5         | 8           |
| Devi Nagar / Ramayapalli / Laksh-minagar  |                         | 4         | 2         | 6           |
| Jalari Peta                               |                         | 8         | 1         | 9           |
| Markundi                                  |                         | 3         |           | 3           |
| Pudimadaka                                |                         | 3         | 2         | 5           |
| Sevanagar                                 |                         | 3         |           | 3           |
| Sonia Gandhi Nagar                        |                         | 1         |           | 1           |
| Vambay Colony                             |                         | 1         |           | 1           |
| <b>2: In Situ Housing</b>                 |                         | <b>8</b>  |           | <b>8</b>    |
| Devi Nagar / Ramayapalli / Laksh-minagar  |                         | 5         |           | 5           |
| Sonia Gandhi Nagar                        |                         | 3         |           | 3           |
| <b>3: Relocation in process</b>           |                         | <b>11</b> | <b>4</b>  | <b>15</b>   |

| Problems at Current Location             | Earlier yes but not now | None       | Yes       | Grand Total |
|------------------------------------------|-------------------------|------------|-----------|-------------|
| Markundi                                 |                         | 11         | 4         | 15          |
| <b>4: Relocated</b>                      | <b>1</b>                | <b>27</b>  | <b>15</b> | <b>43</b>   |
| Devi Nagar / Ramayapalli / Laksh-minagar |                         | 10         | 1         | 11          |
| Paradesipallyam                          |                         | 7          | 5         | 12          |
| Sevanagar                                |                         | 5          | 8         | 13          |
| Vambay Colony                            | 1                       | 5          | 1         | 7           |
| <b>5: Infrastructure Upgradation</b>     |                         | <b>15</b>  | <b>5</b>  | <b>20</b>   |
| Canal Street                             |                         | 15         | 5         | 20          |
| <b>6: Identified for relocation</b>      |                         | <b>26</b>  | <b>6</b>  | <b>32</b>   |
| Bada Harijan Sahi                        |                         | 8          | 2         | 10          |
| Khaja Sahi                               |                         | 3          | 2         | 5           |
| Pichipicha Nagar                         |                         | 2          | 1         | 3           |
| Ramnagar Odiya Sahi                      |                         | 13         | 1         | 14          |
| <b>Grand Total</b>                       | <b>1</b>                | <b>113</b> | <b>40</b> | <b>154</b>  |
| <b>Health (in current locations)</b>     |                         |            |           |             |
| <b>1: Non Beneficiary</b>                |                         | <b>18</b>  | <b>18</b> | <b>36</b>   |
| ASR Nagar                                |                         | 3          | 5         | 8           |
| Devi Nagar / Ramayapalli / Laksh-minagar |                         | 5          | 1         | 6           |
| Jalari Peta                              |                         | 6          | 3         | 9           |
| Markundi                                 |                         |            | 3         | 3           |
| Pudimadaka                               |                         | 2          | 3         | 5           |
| Sevanagar                                |                         | 1          | 2         | 3           |
| Sonia Gandhi Nagar                       |                         | 1          |           | 1           |
| Vambay Colony                            |                         |            | 1         | 1           |
| <b>2: In Situ Housing</b>                |                         | <b>8</b>   |           | <b>8</b>    |
| Devi Nagar / Ramayapalli / Laksh-minagar |                         | 5          |           | 5           |
| Sonia Gandhi Nagar                       |                         | 3          |           | 3           |
| <b>3: Relocation in process</b>          |                         | <b>11</b>  | <b>4</b>  | <b>15</b>   |
| Markundi                                 |                         | 11         | 4         | 15          |
| <b>4: Relocated</b>                      |                         | <b>18</b>  | <b>25</b> | <b>43</b>   |
| Devi Nagar / Ramayapalli / Laksh-minagar |                         | 8          | 3         | 11          |
| Paradesipallyam                          |                         | 5          | 7         | 12          |
| Sevanagar                                |                         | 1          | 12        | 13          |
| Vambay Colony                            |                         | 4          | 3         | 7           |
| <b>5: Infrastructure Upgradation</b>     |                         | <b>14</b>  | <b>6</b>  | <b>20</b>   |

| Problems at Current Location             | Earlier yes but not now | None       | Yes       | Grand Total |
|------------------------------------------|-------------------------|------------|-----------|-------------|
| Canal Street                             |                         | 14         | 6         | 20          |
| <b>6: Identified for relocation</b>      |                         | <b>22</b>  | <b>12</b> | <b>34</b>   |
| Bada Harijan Sahi                        |                         | 10         |           | 10          |
| Khaja Sahi                               |                         | 2          | 3         | 5           |
| Pichipicha Nagar                         |                         | 2          | 3         | 5           |
| Ramnagar Odiya Sahi                      |                         | 8          | 6         | 14          |
| <b>Grand Total</b>                       |                         | <b>91</b>  | <b>65</b> | <b>156</b>  |
| <b>Education (in current locations)</b>  |                         |            |           |             |
| <b>1: Non Beneficiary</b>                |                         | <b>27</b>  | <b>7</b>  | <b>34</b>   |
| ASR Nagar                                |                         | 3          | 3         | 6           |
| Devi Nagar / Ramayapalli / Laksh-minagar |                         | 5          | 1         | 6           |
| Jalari Peta                              |                         | 9          |           | 9           |
| Markundi                                 |                         | 2          | 1         | 3           |
| Pudimadaka                               |                         | 5          |           | 5           |
| Sevanagar                                |                         | 1          | 2         | 3           |
| Sonia Gandhi Nagar                       |                         | 1          |           | 1           |
| Vambay Colony                            |                         | 1          |           | 1           |
| <b>2: In Situ Housing</b>                |                         | <b>7</b>   | <b>1</b>  | <b>8</b>    |
| Devi Nagar / Ramayapalli / Laksh-minagar |                         | 5          |           | 5           |
| Sonia Gandhi Nagar                       |                         | 2          | 1         | 3           |
| <b>3: Relocation in process</b>          |                         | <b>12</b>  | <b>3</b>  | <b>15</b>   |
| Markundi                                 |                         | 12         | 3         | 15          |
| <b>4: Relocated</b>                      |                         | <b>21</b>  | <b>18</b> | <b>39</b>   |
| Devi Nagar / Ramayapalli / Laksh-minagar |                         | 9          | 2         | 11          |
| Paradesipallyam                          |                         | 5          | 4         | 9           |
| Sevanagar                                |                         | 1          | 11        | 12          |
| Vambay Colony                            |                         | 6          | 1         | 7           |
| <b>5: Infrastructure Upgradation</b>     |                         | <b>20</b>  |           | <b>20</b>   |
| Canal Street                             |                         | 20         |           | 20          |
| <b>6: Identified for relocation</b>      |                         | <b>32</b>  | <b>2</b>  | <b>34</b>   |
| Bada Harijan Sahi                        |                         | 10         |           | 10          |
| Khaja Sahi                               |                         | 5          |           | 5           |
| Pichipicha Nagar                         |                         | 3          | 2         | 5           |
| Ramnagar Odiya Sahi                      |                         | 14         |           | 14          |
| <b>Grand Total</b>                       |                         | <b>119</b> | <b>31</b> | <b>150</b>  |

| Problems at Current Location                 | Earlier yes but not now | None       | Yes       | Grand Total |
|----------------------------------------------|-------------------------|------------|-----------|-------------|
| <b>Transportation (in current locations)</b> |                         |            |           |             |
| <b>1: Non Beneficiary</b>                    |                         | <b>31</b>  | <b>5</b>  | <b>36</b>   |
| ASR Nagar                                    |                         | 8          |           | 8           |
| Devi Nagar / Ramayapalli / Laksh-minagar     |                         | 5          | 1         | 6           |
| Jalari Peta                                  |                         | 9          |           | 9           |
| Markundi                                     |                         | 3          |           | 3           |
| Pudimadaka                                   |                         | 5          |           | 5           |
| Sevanagar                                    |                         |            | 3         | 3           |
| Sonia Gandhi Nagar                           |                         | 1          |           | 1           |
| Vambay Colony                                |                         |            | 1         | 1           |
| <b>2: In Situ Housing</b>                    |                         | <b>7</b>   | <b>1</b>  | <b>8</b>    |
| Devi Nagar / Ramayapalli / Laksh-minagar     |                         | 5          |           | 5           |
| Sonia Gandhi Nagar                           |                         | 2          | 1         | 3           |
| <b>3: Relocation in process</b>              |                         | <b>9</b>   | <b>6</b>  | <b>15</b>   |
| Markundi                                     |                         | 9          | 6         | 15          |
| <b>4: Relocated</b>                          | <b>1</b>                | <b>12</b>  | <b>29</b> | <b>42</b>   |
| Devi Nagar / Ramayapalli / Laksh-minagar     |                         | 6          | 5         | 11          |
| Paradesipallyam                              |                         | 3          | 9         | 12          |
| Sevanagar                                    |                         |            | 12        | 12          |
| Vambay Colony                                | 1                       | 3          | 3         | 7           |
| <b>5: Infrastructure Upgradation</b>         |                         | <b>19</b>  | <b>1</b>  | <b>20</b>   |
| Canal Street                                 |                         | 19         | 1         | 20          |
| <b>6: Identified for relocation</b>          |                         | <b>31</b>  | <b>3</b>  | <b>34</b>   |
| Bada Harijan Sahi                            |                         | 10         |           | 10          |
| Khaja Sahi                                   |                         | 5          |           | 5           |
| Pichipicha Nagar                             |                         | 4          | 1         | 5           |
| Ramnagar Odiya Sahi                          |                         | 12         | 2         | 14          |
| <b>Grand Total</b>                           | <b>1</b>                | <b>109</b> | <b>45</b> | <b>155</b>  |
| <b>Community (in current locations)</b>      |                         |            |           |             |
| <b>1: Non Beneficiary</b>                    |                         | <b>36</b>  |           | <b>36</b>   |
| ASR Nagar                                    |                         | 8          |           | 8           |
| Devi Nagar / Ramayapalli / Laksh-minagar     |                         | 6          |           | 6           |
| Jalari Peta                                  |                         | 9          |           | 9           |
| Markundi                                     |                         | 3          |           | 3           |
| Pudimadaka                                   |                         | 5          |           | 5           |

| Problems at Current Location            | Earlier yes but not now | None       | Yes       | Grand Total |
|-----------------------------------------|-------------------------|------------|-----------|-------------|
| Sevanagar                               |                         | 3          |           | 3           |
| Sonia Gandhi Nagar                      |                         | 1          |           | 1           |
| Vambay Colony                           |                         | 1          |           | 1           |
| <b>2: In Situ Housing</b>               |                         | <b>7</b>   | <b>1</b>  | <b>8</b>    |
| Devi Nagar / Ramayapalli / Lakshminagar |                         | 5          |           | 5           |
| Sonia Gandhi Nagar                      |                         | 2          | 1         | 3           |
| <b>3: Relocation in process</b>         |                         | <b>12</b>  | <b>3</b>  | <b>15</b>   |
| Markundi                                |                         | 12         | 3         | 15          |
| <b>4: Relocated</b>                     |                         | <b>33</b>  | <b>8</b>  | <b>41</b>   |
| Devi Nagar / Ramayapalli / Lakshminagar |                         | 10         | 1         | 11          |
| Paradesipallyam                         |                         | 9          | 3         | 12          |
| Sevanagar                               |                         | 7          | 4         | 11          |
| Vambay Colony                           |                         | 7          |           | 7           |
| <b>5: Infrastructure Upgradation</b>    |                         | <b>20</b>  |           | <b>20</b>   |
| Canal Street                            |                         | 20         |           | 20          |
| <b>6: Identified for relocation</b>     |                         | <b>33</b>  | <b>1</b>  | <b>34</b>   |
| Bada Harijan Sahi                       |                         | 10         |           | 10          |
| Khaja Sahi                              |                         | 4          | 1         | 5           |
| Pichipicha Nagar                        |                         | 5          |           | 5           |
| Ramnagar Odiya Sahi                     |                         | 14         |           | 14          |
| <b>Grand Total</b>                      |                         | <b>141</b> | <b>13</b> | <b>154</b>  |

### Problems faced in original locations

Of those who underwent housing interventions, the problems they claimed they faced before these interventions included rent (16 of 37), housing (15 of 37), and sanitation (10 of 37). Comparing the information presented above (after intervention) with data from before

the intervention, it seems that while the problems of rent may have decreased for some, many other problems of livelihood, drinking water, electricity, health, education, and transportation have emerged. Problems involving housing and sanitation are also not completely rectified in this process.

| Problems faced in the original locations   | None      | Yes      | Grand Total |
|--------------------------------------------|-----------|----------|-------------|
| <b>Livelihoods (in previous locations)</b> |           |          |             |
| <b>2: In Situ Housing</b>                  | <b>8</b>  |          | <b>8</b>    |
| Devi Nagar / Ramayapalli / Lakshminagar    | 5         |          | 5           |
| Sonia Gandhi Nagar                         | 3         |          | 3           |
| <b>3: Relocation in process</b>            | <b>15</b> |          | <b>15</b>   |
| Markundi                                   | 15        |          | 15          |
| <b>4: Relocated</b>                        | <b>29</b> | <b>7</b> | <b>36</b>   |
| Devi Nagar / Ramayapalli / Lakshminagar    | 8         | 3        | 11          |

| Problems faced in the original locations      | None      | Yes       | Grand Total |
|-----------------------------------------------|-----------|-----------|-------------|
| Paradesipallyam                               | 9         | 3         | 12          |
| Sevanagar                                     | 7         |           | 7           |
| Vambay Colony                                 | 5         | 1         | 6           |
| <b>Grand Total</b>                            | <b>52</b> | <b>7</b>  | <b>59</b>   |
| <b>Rent (in previous locations)</b>           |           |           |             |
| <b>2: In Situ Housing</b>                     | <b>6</b>  | <b>2</b>  | <b>8</b>    |
| Devi Nagar / Ramayapalli / Lakshminagar       | 5         |           | 5           |
| Sonia Gandhi Nagar                            | 1         | 2         | 3           |
| <b>3: Relocation in process</b>               | <b>15</b> |           | <b>15</b>   |
| Markundi                                      | 15        |           | 15          |
| <b>4: Relocated</b>                           | <b>21</b> | <b>16</b> | <b>37</b>   |
| Devi Nagar / Ramayapalli / Lakshminagar       | 11        |           | 11          |
| Paradesipallyam                               | 2         | 10        | 12          |
| Sevanagar                                     | 7         |           | 7           |
| Vambay Colony                                 | 1         | 6         | 7           |
| <b>Grand Total</b>                            | <b>42</b> | <b>18</b> | <b>60</b>   |
| <b>Housing (in previous locations)</b>        |           |           |             |
| <b>2: In Situ Housing</b>                     | <b>5</b>  | <b>3</b>  | <b>8</b>    |
| Devi Nagar / Ramayapalli / Lakshminagar       | 5         |           | 5           |
| Sonia Gandhi Nagar                            |           | 3         | 3           |
| <b>3: Relocation in process</b>               | <b>15</b> |           | <b>15</b>   |
| Markundi                                      | 15        |           | 15          |
| <b>4: Relocated</b>                           | <b>22</b> | <b>15</b> | <b>37</b>   |
| Devi Nagar / Ramayapalli / Lakshminagar       | 9         | 2         | 11          |
| Paradesipallyam                               | 6         | 6         | 12          |
| Sevanagar                                     | 5         | 2         | 7           |
| Vambay Colony                                 | 2         | 5         | 7           |
| <b>Grand Total</b>                            | <b>42</b> | <b>18</b> | <b>60</b>   |
| <b>Drinking Water (in previous locations)</b> |           |           |             |
| <b>2: In Situ Housing</b>                     | <b>6</b>  | <b>2</b>  | <b>8</b>    |
| Devi Nagar / Ramayapalli / Lakshminagar       | 5         |           | 5           |
| Sonia Gandhi Nagar                            | 1         | 2         | 3           |
| <b>3: Relocation in process</b>               | <b>15</b> |           | <b>15</b>   |
| Markundi                                      | 15        |           | 15          |
| <b>4: Relocated</b>                           | <b>30</b> | <b>7</b>  | <b>37</b>   |
| Devi Nagar / Ramayapalli / Lakshminagar       | 11        |           | 11          |
| Paradesipallyam                               | 9         | 3         | 12          |
| Sevanagar                                     | 6         | 1         | 7           |

| Problems faced in the original locations   | None      | Yes       | Grand Total |
|--------------------------------------------|-----------|-----------|-------------|
| Vambay Colony                              | 4         | 3         | 7           |
| <b>Grand Total</b>                         | <b>51</b> | <b>9</b>  | <b>60</b>   |
| <b>Sanitation (in previous locations)</b>  |           |           |             |
| <b>2: In Situ Housing</b>                  | <b>6</b>  | <b>2</b>  | <b>8</b>    |
| Devi Nagar / Ramayapalli / Lakshminagar    | 5         |           | 5           |
| Sonia Gandhi Nagar                         | 1         | 2         | 3           |
| <b>3: Relocation in process</b>            | <b>15</b> |           | <b>15</b>   |
| Markundi                                   | 15        |           | 15          |
| <b>4: Relocated</b>                        | <b>27</b> | <b>10</b> | <b>37</b>   |
| Devi Nagar / Ramayapalli / Lakshminagar    | 9         | 2         | 11          |
| Paradesipallyam                            | 10        | 2         | 12          |
| Sevanagar                                  | 2         | 5         | 7           |
| Vambay Colony                              | 6         | 1         | 7           |
| <b>Grand Total</b>                         | <b>48</b> | <b>12</b> | <b>60</b>   |
| <b>Electricity (in previous locations)</b> |           |           |             |
| <b>2: In Situ Housing</b>                  | <b>6</b>  | <b>2</b>  | <b>8</b>    |
| Devi Nagar / Ramayapalli / Lakshminagar    | 5         |           | 5           |
| Sonia Gandhi Nagar                         | 1         | 2         | 3           |
| <b>3: Relocation in process</b>            | <b>15</b> |           | <b>15</b>   |
| Markundi                                   | 15        |           | 15          |
| <b>4: Relocated</b>                        | <b>31</b> | <b>6</b>  | <b>37</b>   |
| Devi Nagar / Ramayapalli / Lakshminagar    | 9         | 2         | 11          |
| Paradesipallyam                            | 11        | 1         | 12          |
| Sevanagar                                  | 6         | 1         | 7           |
| Vambay Colony                              | 5         | 2         | 7           |
| <b>Grand Total</b>                         | <b>52</b> | <b>8</b>  | <b>60</b>   |
| <b>Health (in previous locations)</b>      |           |           |             |
| <b>2: In Situ Housing</b>                  | <b>8</b>  |           | <b>8</b>    |
| Devi Nagar / Ramayapalli / Lakshminagar    | 5         |           | 5           |
| Sonia Gandhi Nagar                         | 3         |           | 3           |
| <b>3: Relocation in process</b>            | <b>15</b> |           | <b>15</b>   |
| Markundi                                   | 15        |           | 15          |
| <b>4: Relocated</b>                        | <b>32</b> | <b>5</b>  | <b>37</b>   |
| Devi Nagar / Ramayapalli / Lakshminagar    | 10        | 1         | 11          |
| Paradesipallyam                            | 11        | 1         | 12          |
| Sevanagar                                  | 6         | 1         | 7           |
| Vambay Colony                              | 5         | 2         | 7           |
| <b>Grand Total</b>                         | <b>55</b> | <b>5</b>  | <b>60</b>   |



| Problems faced in the original locations        | None      | Yes      | Grand Total |
|-------------------------------------------------|-----------|----------|-------------|
| <b>Education (in previous locations)</b>        |           |          |             |
| <b>2: In Situ Housing</b>                       | <b>8</b>  |          | <b>8</b>    |
| Devi Nagar / Ramayapalli / Lakshminagar         | 5         |          | 5           |
| Sonia Gandhi Nagar                              | 3         |          | 3           |
| <b>3: Relocation in process</b>                 | <b>15</b> |          | <b>15</b>   |
| Markundi                                        | 15        |          | 15          |
| <b>4: Relocated</b>                             | <b>32</b> | <b>2</b> | <b>34</b>   |
| Devi Nagar / Ramayapalli / Lakshminagar         | 10        | 1        | 11          |
| Paradesipallyam                                 | 12        |          | 12          |
| Sevanagar                                       | 4         | 1        | 5           |
| Vambay Colony                                   | 6         |          | 6           |
| <b>Grand Total</b>                              | <b>55</b> | <b>2</b> | <b>57</b>   |
| <b>Transportation (in previous locations)</b>   |           |          |             |
| <b>2: In Situ Housing</b>                       | <b>8</b>  |          | <b>8</b>    |
| Devi Nagar / Ramayapalli / Lakshminagar         | 5         |          | 5           |
| Sonia Gandhi Nagar                              | 3         |          | 3           |
| <b>3: Relocation in process</b>                 | <b>15</b> |          | <b>15</b>   |
| Markundi                                        | 15        |          | 15          |
| <b>4: Relocated</b>                             | <b>35</b> | <b>2</b> | <b>37</b>   |
| Devi Nagar / Ramayapalli / Lakshminagar         | 10        | 1        | 11          |
| Paradesipallyam                                 | 12        |          | 12          |
| Sevanagar                                       | 6         | 1        | 7           |
| Vambay Colony                                   | 7         |          | 7           |
| <b>Grand Total</b>                              | <b>58</b> | <b>2</b> | <b>60</b>   |
| <b>Community living (in previous locations)</b> |           |          |             |
| <b>2: In Situ Housing</b>                       | <b>8</b>  |          | <b>8</b>    |
| Devi Nagar / Ramayapalli / Lakshminagar         | 5         |          | 5           |
| Sonia Gandhi Nagar                              | 3         |          | 3           |
| <b>3: Relocation in process</b>                 | <b>15</b> |          | <b>15</b>   |
| Markundi                                        | 15        |          | 15          |
| <b>4: Relocated</b>                             | <b>36</b> | <b>1</b> | <b>37</b>   |
| Devi Nagar / Ramayapalli / Lakshminagar         | 11        |          | 11          |
| Paradesipallyam                                 | 12        |          | 12          |
| Sevanagar                                       | 6         | 1        | 7           |
| Vambay Colony                                   | 7         |          | 7           |
| <b>Grand Total</b>                              | <b>59</b> | <b>1</b> | <b>60</b>   |

### Changes in family income after relocation

Of the relocated, 16 of 31 respondents mentioned they were facing reduction in family income after relocation.

| Changes in family income after housing allocations | No change | Yes - decreased | Yes - Increased | Grand Total |
|----------------------------------------------------|-----------|-----------------|-----------------|-------------|
| <b>2: In Situ Housing</b>                          | <b>3</b>  |                 |                 | <b>3</b>    |
| Sonia Gandhi Nagar                                 | 3         |                 |                 | 3           |
| <b>4: Relocated</b>                                | <b>12</b> | <b>16</b>       | <b>3</b>        | <b>31</b>   |
| Devi Nagar / Ramayapalli / Lakshminagar            | 3         | 2               |                 | 5           |
| Paradesipallyam                                    | 2         | 7               | 2               | 11          |
| Sevanagar                                          | 5         | 7               |                 | 12          |
| Vambay Colony                                      | 2         |                 | 1               | 3           |
| <b>Grand Total</b>                                 | <b>15</b> | <b>16</b>       | <b>3</b>        | <b>34</b>   |

### Changes in older family members living together before and after intervention

Of the relocated, 14 out of 33 HHs mentioned that their older family members stopped staying with them after

the relocation. Many of them are staying in the older locations (ODRP rural sites, where families continue to have possession of the old sites) or households have split into multiple families due to the lack of space in one allotted house, among other reasons.

| Change in older family members staying with family before and after relocation | No Change | Together after not before | Together before not after | Grand Total |
|--------------------------------------------------------------------------------|-----------|---------------------------|---------------------------|-------------|
| <b>2: In Situ Housing</b>                                                      | <b>2</b>  |                           | <b>1</b>                  | <b>3</b>    |
| Sonia Gandhi Nagar                                                             | 2         |                           | 1                         | 3           |
| <b>3: Relocation in process</b>                                                | <b>3</b>  |                           | <b>2</b>                  | <b>5</b>    |
| Markundi                                                                       | 3         |                           | 2                         | 5           |
| <b>4: Relocated</b>                                                            | <b>15</b> | <b>4</b>                  | <b>14</b>                 | <b>33</b>   |
| Devi Nagar / Ramayapalli / Lakshminagar                                        | 3         |                           | 4                         | 7           |
| Paradesipallyam                                                                | 4         |                           | 6                         | 10          |
| Sevanagar                                                                      | 4         | 3                         | 3                         | 10          |
| Vambay Colony                                                                  | 4         | 1                         | 1                         | 6           |
| <b>Grand Total</b>                                                             | <b>20</b> | <b>4</b>                  | <b>17</b>                 | <b>41</b>   |





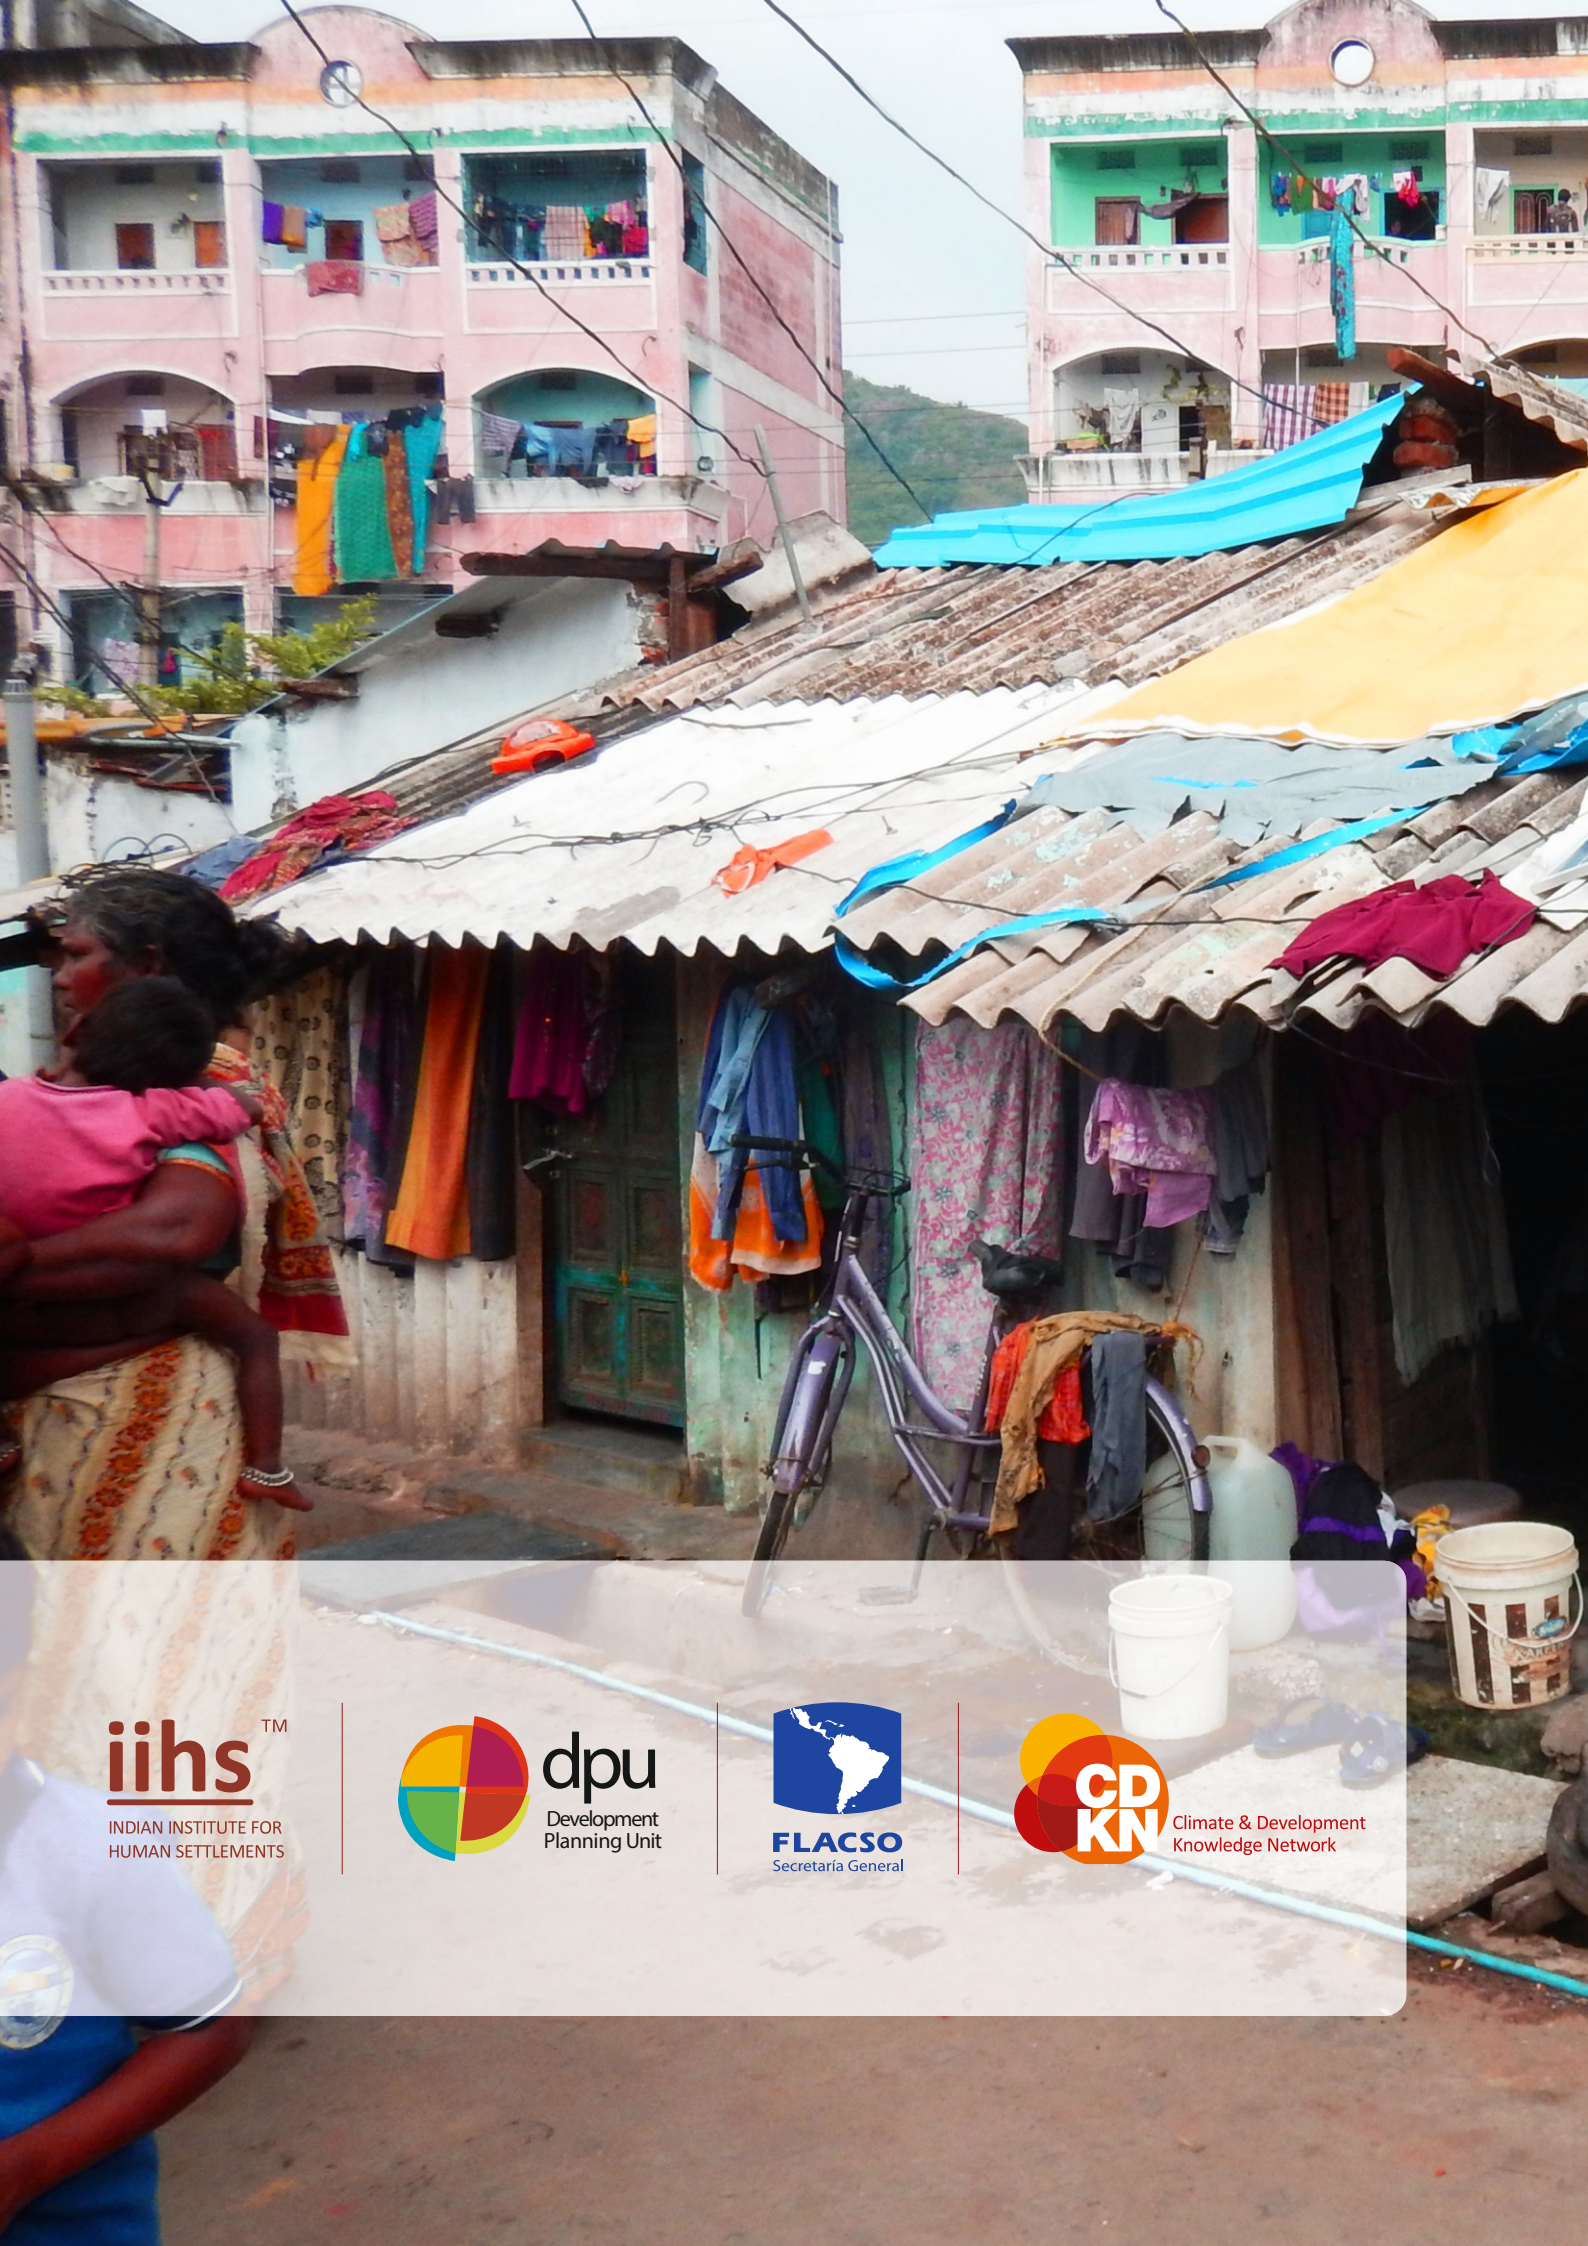

**iihs**<sup>TM</sup>  
INDIAN INSTITUTE FOR  
HUMAN SETTLEMENTS

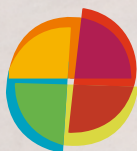

**dpu**  
Development  
Planning Unit

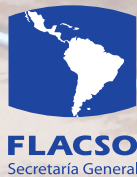

**FLACSO**  
Secretaría General

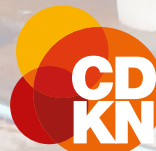

**CD  
KN**

Climate & Development  
Knowledge Network
